# Supplementary material for: Evaluation of DNA barcoding reference databases for marine species in the western and central Pacific Ocean
Source: PeerJ journal article supplement (doi:10.7717/peerj.19674), 2025-07-14
Supplement: Sup3_t-SNE_Cluster.pdf [file Sup3_t-SNE_Cluster.pdf]

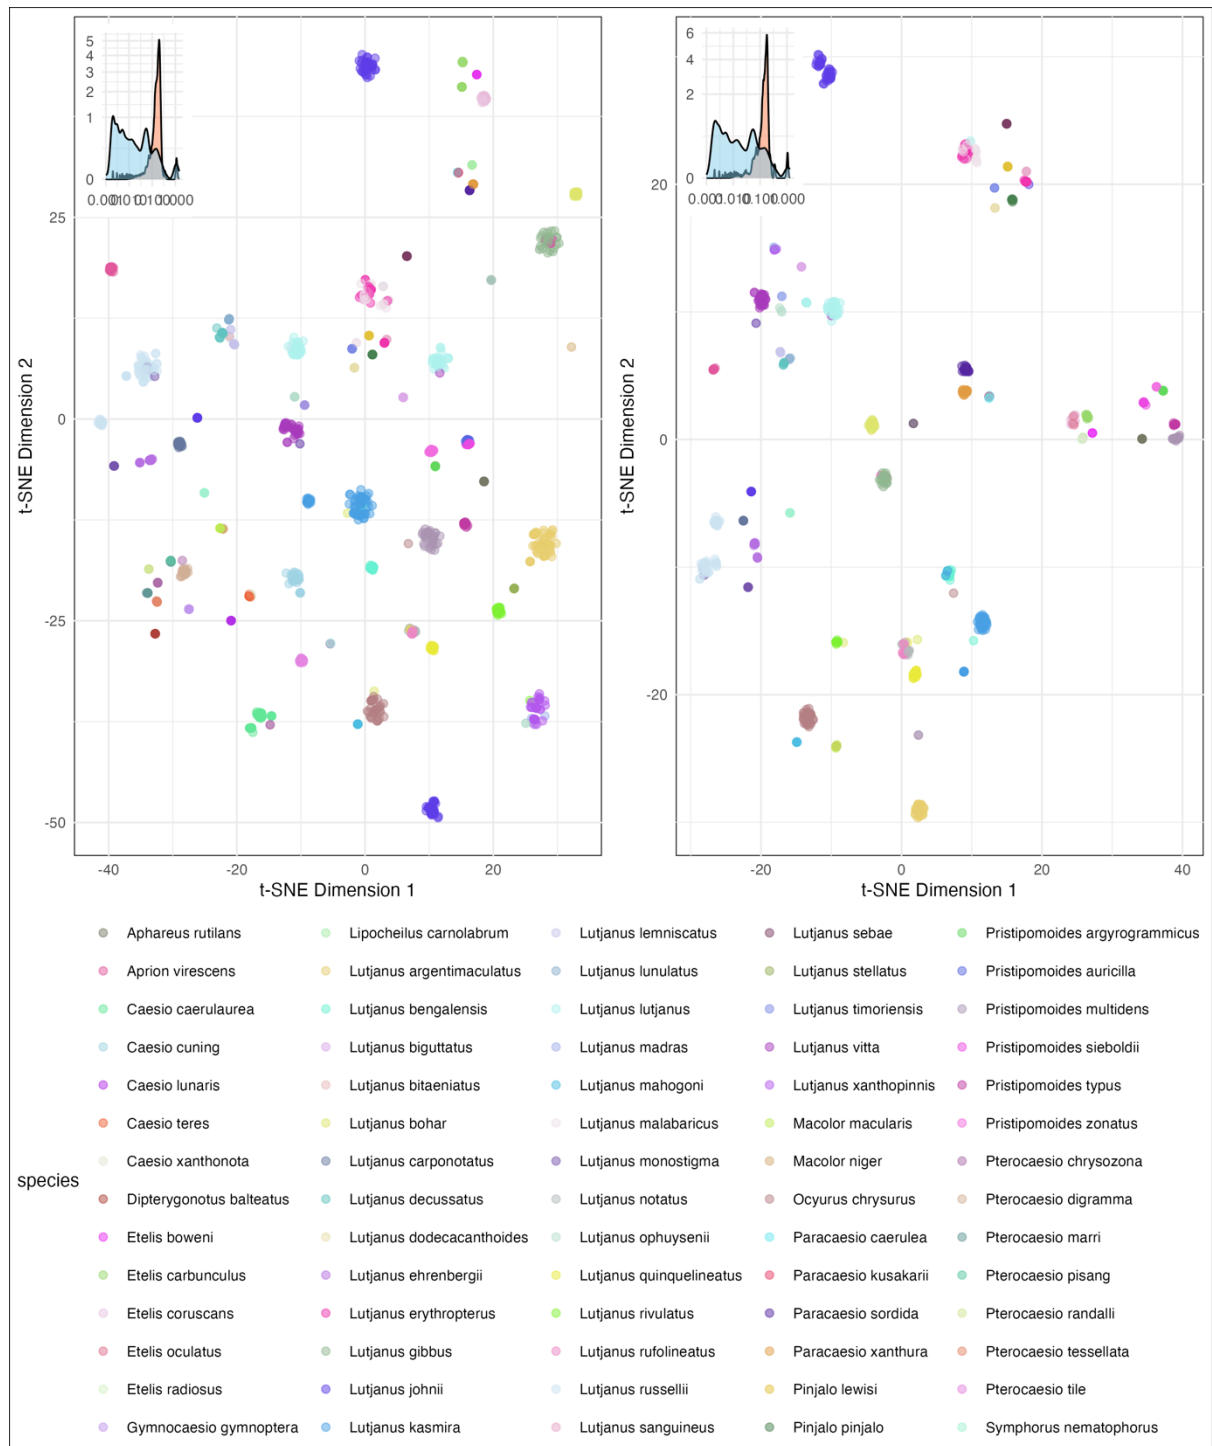

Supplementary figure 1. t-SNE clustering of sequences from NCBI (left) and BOLD (right) for Lutjanidae species.

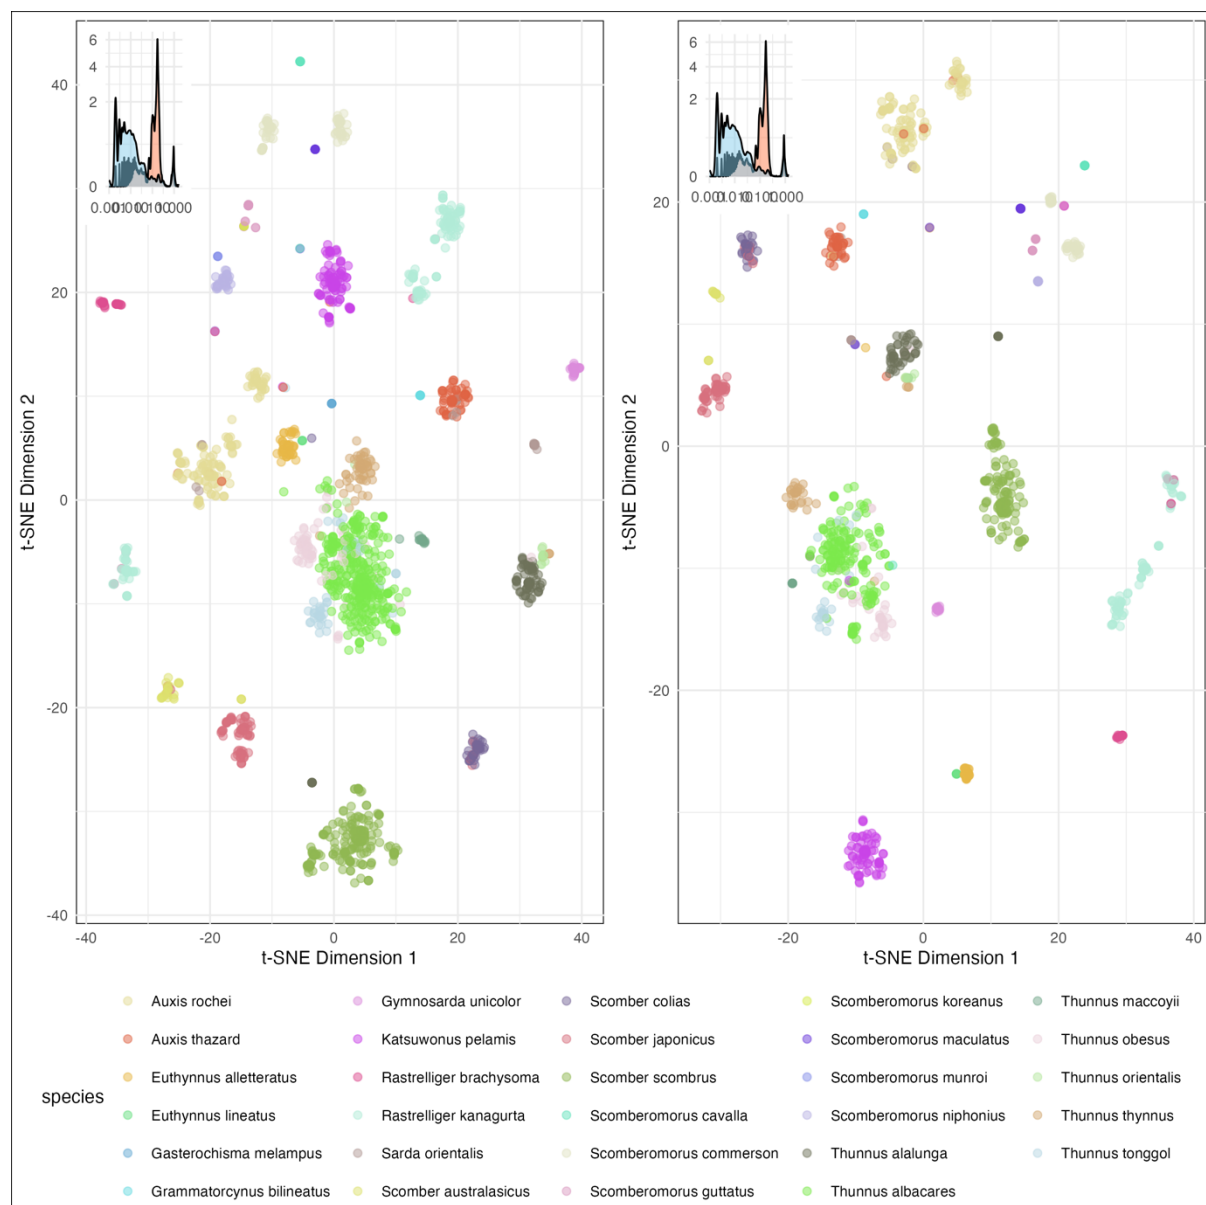

Supplementary figure 2. t-SNE clustering of sequences from NCBI (left) and BOLD (right) for Scombridae species.
