# Supplementary material for: Evaluation of DNA barcoding reference databases for marine species in the western and central Pacific Ocean
Source: PeerJ. 2025 Jul 14;13:e19674. doi: 10.7717/peerj.19674 (PMC12269782; doi:10.7717/peerj.19674)
Supplement: Supplemental Information 2 [file peerj-13-19674-s002.xlsx]

## Sheet: readme
Description of sheets
This Excel file contains supplenmentary data for the manuscript "Evaluation of DNA barcoding reference databases for marine species in the Western and Central Pacific Ocean"
Sheet name			Decription
NCBI_conflicts			containing problem sequences from NCBI, which are assigned to multiple taxonomic groups. Conflict1 and conflict2 are taxonomic groups with the same sequence, level is the highest taxonomic level where the conflicts occur, name1_valid and name1_valid are checking whether the taxonomic names are valid, name1_status and name2_status are checking whether taxonomic names are accepted scientific names.
BOLD_conflicts			containing problem sequences from BOLD, which are assigned to multiple taxonomic groups. Columns are same as NCBI_conflicts.
NCBI_barcodingGap_problem			containing problem NCBI sequences of the 100 species which were identified with high intraspecific distances and low inter specicfic distances. Seq1 and Seq2 are NCBI sequence IDs, Distance is the genetic distance between the two sequences, taxid1 and taxid2 are taxonomic ID of the two sequences in NCBI, phylum1, phylum2, species1, species2 are according phylum and species of the two sequences, T…
BOLD_barcodingGap_problem			containing problem BOLD sequences of the 100 species which were identified with high intraspecific distances and low inter specicfic distances. Columns are generally same as NCBI_barcodingGap_problem, except for the Seq1 and Seq2 are BOLD sequence IDs, bin1 and bin2 are BIN IDs.

## Sheet: NCBI_conflict
conflict2	conflict1	level	name1_valid	name1_status	name2_valid	name2_status
Abudefduf septemfasciatus	Abudefduf bengalensis	species	Valid	accepted	Valid	accepted
Abudefduf septemfasciatus	Abudefduf bengalensis	species	Valid	accepted	Valid	accepted
Abudefduf septemfasciatus	Abudefduf bengalensis	species	Valid	accepted	Valid	accepted
Abudefduf vaigiensis	Abudefduf sexfasciatus	species	Valid	accepted	Valid	accepted
Acanthastrea echinata	Acanthastrea rotundoflora	species	Valid	accepted	Valid	accepted
Acanthastrea echinata	Acanthastrea subechinata	species	Valid	accepted	Valid	accepted
Acanthastrea hemprichii	Acanthastrea echinata	species	Valid	accepted	Valid	accepted
Acanthastrea hemprichii	Acanthastrea rotundoflora	species	Valid	accepted	Valid	accepted
Acanthastrea rotundoflora	Acanthastrea pachysepta	species	Valid	accepted	Valid	accepted
Acanthastrea subechinata	Acanthastrea hemprichii	species	Valid	accepted	Valid	accepted
Acanthephyra pelagica	Acanthephyra acanthitelsonis	species	Valid	junior subjective synonym	Valid	accepted
Acanthephyra pelagica	Acanthephyra sica	species	Valid	junior subjective synonym	Valid	accepted
Acanthopagrus berda	Acanthopagrus pacificus	species	Valid	accepted	Valid	accepted
Acanthopagrus berda	Acanthopagrus pacificus	species	Valid	accepted	Valid	accepted
Acanthopagrus sivicolus	Acanthopagrus schlegelii	species	Valid	accepted	Valid	accepted
Acanthuriformes	Labriformes	order	Error	NA	Valid	accepted
Acanthurus leucosternon	Acanthurus nigricans	species	Valid	accepted	Valid	accepted
Acanthurus leucosternon	Acanthurus nigricans	species	Valid	accepted	Valid	accepted
Acheilognathus chankaensis	Acheilognathus macropterus	species	Valid	accepted	Valid	unaccepted
Achiropsetta	Neoachiropsetta	genus	Valid	accepted	Valid	accepted
Aclyvolva	Hiatavolva	genus	Valid	accepted	Valid	accepted
Aclyvolva	Hiatavolva	genus	Valid	accepted	Valid	accepted
Aclyvolva	Hiatavolva	genus	Valid	accepted	Valid	accepted
Aclyvolva	Hiatavolva	genus	Valid	accepted	Valid	accepted
Aclyvolva lanceolata	Aclyvolva lamyi	species	Valid	unaccepted	Valid	accepted
Acmaeidae	Pectinodontidae	family	Valid	accepted	Valid	accepted
Acropomatiformes	Pleuronectiformes	order	Valid	accepted	Valid	accepted
Acropora cervicornis	Acropora palmata	species	Valid	accepted	Valid	accepted
Acropora loripes	Acropora robusta	species	Valid	accepted	Valid	accepted
Acropora nana	Acropora lutkeni	species	Valid	accepted	Valid	accepted
Acropora pulchra	Acropora samoensis	species	Valid	accepted	Valid	accepted
Acropora valida	Acropora willisae	species	Valid	accepted	Valid	accepted
Aeneator valedictus	Aeneator recens	species	Valid	accepted	Valid	accepted
Agononida norfocerta	Agononida incerta	species	Valid	accepted	Valid	accepted
Albatrossia	Coryphaenoides	genus	Valid	accepted	Valid	accepted
Alepes djedaba	Alepes kleinii	species	Valid	accepted	Valid	accepted
Alepes djedaba	Alepes kleinii	species	Valid	accepted	Valid	accepted
Alepes djedaba	Alepes kleinii	species	Valid	accepted	Valid	accepted
Alepes djedaba	Alepes kleinii	species	Valid	accepted	Valid	accepted
Alepes kleinii	Alepes djedaba	species	Valid	accepted	Valid	accepted
Allocareproctus unangas	Allocareproctus jordani	species	Valid	accepted	Valid	accepted
Alopias superciliosus	Alopias vulpinus	species	Valid	accepted	Valid	accepted
Alopias superciliosus	Alopias vulpinus	species	Valid	accepted	Valid	accepted
Alvinocaris dissimilis	Alvinocaris chelys	species	Valid	junior subjective synonym	Valid	accepted
Ambassis	Parambassis	genus	Valid	accepted	Valid	accepted
Ambassis interrupta	Ambassis macracanthus	species	Valid	accepted	Valid	accepted
Ambassis macracanthus	Ambassis interrupta	species	Valid	accepted	Valid	accepted
Ambassis vachellii	Ambassis dussumieri	species	Valid	accepted	Valid	accepted
Ambassis vachellii	Ambassis dussumieri	species	Valid	accepted	Valid	accepted
Amblypneustes ovum	Amblypneustes elevatus	species	Valid	accepted	Valid	accepted
Amblyraja hyperborea	Amblyraja badia	species	Valid	junior subjective synonym	Valid	accepted
Amphibalanus	Balanus	genus	Valid	accepted	Valid	accepted
Amphiprion akindynos	Amphiprion clarkii	species	Valid	accepted	Valid	accepted
Amphiprion sebae	Amphiprion clarkii	species	Valid	accepted	Valid	accepted
Amphiprion sebae	Amphiprion clarkii	species	Valid	accepted	Valid	accepted
Anadara antiquata	Anadara sativa	species	Valid	unaccepted	Valid	accepted
Andamia tetradactylus	Andamia reyi	species	Valid	accepted	Valid	accepted
Annella mollis	Annella reticulata	species	Valid	accepted	Valid	accepted
Antarctotetilla	Cinachyra	genus	Valid	accepted	Valid	accepted
Antarctotetilla leptoderma	Antarctotetilla sagitta	species	Valid	accepted	Valid	accepted
Aphanopus	Benthodesmus	genus	Valid	accepted	Valid	accepted
Apogon indicus	Apogon susanae	species	Valid	accepted	Valid	accepted
Argonauta argo	Argonauta nodosus	species	Valid	accepted	Valid	accepted
Argyropelecus aculeatus	Argyropelecus hemigymnus	species	Valid	accepted	Valid	accepted
Argyropelecus olfersii	Argyropelecus sladeni	species	Valid	accepted	Valid	accepted
Arius dispar	Arius manillensis	species	Valid	accepted	Valid	accepted
Arius dispar	Arius manillensis	species	Valid	accepted	Valid	accepted
Arius dispar	Arius manillensis	species	Valid	accepted	Valid	accepted
Arius maculatus	Arius arius	species	Valid	accepted	Valid	accepted
Arius manillensis	Arius dispar	species	Valid	accepted	Valid	accepted
Arius manillensis	Arius dispar	species	Valid	accepted	Valid	accepted
Arothron meleagris	Arothron nigropunctatus	species	Valid	accepted	Valid	accepted
Assiminea hiradoensis	Assiminea estuarina	species	Valid	accepted	Valid	accepted
Asteronyx loveni	Asteronyx luzonicus	species	Valid	accepted	Valid	accepted
Asterospicularia randalli	Asterospicularia laurae	species	Valid	accepted	Valid	accepted
Astraeosmilia curvata	Astraeosmilia tumida	species	Valid	accepted	Valid	accepted
Astraeosmilia curvata	Astraeosmilia tumida	species	Valid	accepted	Valid	accepted
Astreopora myriophthalma	Astreopora explanata	species	Valid	accepted	Valid	accepted
Astreopora randalli	Astreopora myriophthalma	species	Valid	accepted	Valid	accepted
Atrina pectinata	Atrina lischkeana	species	Valid	accepted	Valid	accepted
Atrina pectinata	Atrina lischkeana	species	Valid	accepted	Valid	accepted
Atrina pectinata	Atrina lischkeana	species	Valid	accepted	Valid	accepted
Atrina pectinata	Atrina lischkeana	species	Valid	accepted	Valid	accepted
Atrina pectinata	Atrina lischkeana	species	Valid	accepted	Valid	accepted
Atrina pectinata	Atrina lischkeana	species	Valid	accepted	Valid	accepted
Atrina pectinata	Atrina lischkeana	species	Valid	accepted	Valid	accepted
Atrina pectinata	Atrina lischkeana	species	Valid	accepted	Valid	accepted
Atrina pectinata	Atrina lischkeana	species	Valid	accepted	Valid	accepted
Atrina pectinata	Atrina lischkeana	species	Valid	accepted	Valid	accepted
Atrina pectinata	Atrina lischkeana	species	Valid	accepted	Valid	accepted
Atrina pectinata	Atrina lischkeana	species	Valid	accepted	Valid	accepted
Atrina pectinata	Atrina lischkeana	species	Valid	accepted	Valid	accepted
Aulacomya	Mytilus	genus	Valid	accepted	Valid	accepted
Aurelia labiata	Aurelia aurita	species	Valid	accepted	Valid	accepted
Australopsammia	Tubastraea	genus	Valid	accepted	Valid	junior subjective synonym
Austrocochlea constricta	Austrocochlea porcata	species	Valid	accepted	Valid	accepted
Austrocochlea constricta	Austrocochlea porcata	species	Valid	accepted	Valid	accepted
Auxis thazard	Auxis rochei	species	Valid	accepted	Valid	accepted
Balanophyllia	Australopsammia	genus	Valid	junior subjective synonym	Valid	accepted
Bassanago bulbiceps	Bassanago hirsutus	species	Valid	accepted	Valid	accepted
Bathypterois atricolor	Bathypterois ventralis	species	Valid	accepted	Valid	accepted
Bathypterois atricolor	Bathypterois ventralis	species	Valid	accepted	Valid	accepted
Bathyraja eatonii	Bathyraja murrayi	species	Valid	accepted	Valid	accepted
Bathyraja eatonii	Bathyraja murrayi	species	Valid	accepted	Valid	accepted
Bathyraja mariposa	Bathyraja interrupta	species	Valid	accepted	Valid	accepted
Bathyuroconger	Bathycongrus	genus	Valid	accepted	Valid	accepted
Beloniformes	Labriformes	order	Error	NA	Valid	accepted
Bembrops platyrhynchus	Bembrops philippinus	species	Valid	unaccepted	Valid	accepted
Biflustra perfragilis	Biflustra savartii	species	Valid	accepted	Valid	accepted
Blastomussa wellsi	Blastomussa merleti	species	Valid	accepted	Valid	accepted
Bodianus tanyokidus	Bodianus rubrisos	species	Valid	accepted	Valid	accepted
Bohadschia marmorata	Bohadschia tenuissima	species	Valid	unaccepted	Valid	accepted
Brachypterois serrulata	Brachypterois serrulifer	species	Valid	accepted	Valid	accepted
Branchiostegus japonicus	Branchiostegus auratus	species	Valid	accepted	Valid	accepted
Bubarida	Axinellida	order	Valid	accepted	Valid	accepted
Buccinum undatum	Buccinum plectrum	species	Valid	accepted	Valid	accepted
Bugulina californica	Bugulina stolonifera	species	Valid	accepted	Valid	accepted
Calanidae	Metridinidae	family	Valid	accepted	Valid	accepted
Calanus glacialis	Calanus marshallae	species	Valid	accepted	Valid	accepted
Calyptogena pacifica	Calyptogena extenta	species	Valid	accepted	Valid	accepted
Calyptrophora angularis	Calyptrophora wyvillei	species	Valid	accepted	Valid	accepted
Calyptrophora inornata	Calyptrophora wyvillei	species	Valid	accepted	Valid	accepted
Candidella helminthophora	Candidella gigantea	species	Valid	accepted	Valid	accepted
Carangiformes	Perciformes	order	Valid	accepted	Valid	accepted
Caranx	Carangoides	genus	Valid	accepted	Valid	accepted
Caranx	Carangoides	genus	Valid	accepted	Valid	accepted
Caranx heberi	Caranx sexfasciatus	species	Valid	accepted	Valid	accepted
Caranx hippos	Caranx ignobilis	species	Valid	accepted	Valid	accepted
Caranx melampygus	Caranx sexfasciatus	species	Valid	accepted	Valid	accepted
Carassius auratus	Carassius gibelio	species	Valid	accepted	Valid	accepted
Carassius auratus	Carassius gibelio	species	Valid	accepted	Valid	accepted
Carassius auratus	Carassius gibelio	species	Valid	accepted	Valid	accepted
Carassius auratus	Carassius gibelio	species	Valid	accepted	Valid	accepted
Carassius auratus	Carassius gibelio	species	Valid	accepted	Valid	accepted
Carassius gibelio	Carassius auratus	species	Valid	accepted	Valid	accepted
Carcharhinidae	Triakidae	family	Valid	accepted	Valid	accepted
Carcharhinus altimus	Carcharhinus plumbeus	species	Valid	accepted	Valid	accepted
Carcharhinus amblyrhynchoides	Carcharhinus limbatus	species	Valid	accepted	Valid	accepted
Carcharhinus amblyrhynchoides	Carcharhinus limbatus	species	Valid	accepted	Valid	accepted
Carcharhinus brevipinna	Carcharhinus limbatus	species	Valid	accepted	Valid	accepted
Carcharhinus cautus	Carcharhinus melanopterus	species	Valid	accepted	Valid	accepted
Carcharhinus dussumieri	Carcharhinus coatesi	species	Valid	accepted	Valid	accepted
Carcharhinus galapagensis	Carcharhinus obscurus	species	Valid	accepted	Valid	accepted
Carcharhinus galapagensis	Carcharhinus obscurus	species	Valid	accepted	Valid	accepted
Carcharhinus galapagensis	Carcharhinus obscurus	species	Valid	accepted	Valid	accepted
Carcharhinus limbatus	Carcharhinus brevipinna	species	Valid	accepted	Valid	accepted
Carcharhinus limbatus	Carcharhinus tilstoni	species	Valid	accepted	Valid	accepted
Carcharhinus plumbeus	Carcharhinus altimus	species	Valid	accepted	Valid	accepted
Carcharhinus sorrah	Carcharhinus brevipinna	species	Valid	accepted	Valid	accepted
Carcharhinus sorrah	Carcharhinus brevipinna	species	Valid	accepted	Valid	accepted
Carcharhinus tilstoni	Carcharhinus limbatus	species	Valid	accepted	Valid	accepted
Caridina gracilipes	Caridina gracilirostris	species	Valid	accepted	Valid	accepted
Caryophylliidae	Euphyllidae	family	Valid	junior homonym	Valid	accepted
Caryophylliidae	Euphyllidae	family	Valid	junior homonym	Valid	accepted
Caryophylliidae	Euphyllidae	family	Valid	junior homonym	Valid	accepted
Catenicellidae	Thalamoporellidae	family	Valid	accepted	Valid	accepted
Cellana strigilis	Cellana oliveri	species	Valid	accepted	Valid	accepted
Centrarchiformes	Gobiiformes	order	Valid	accepted	Valid	accepted
Centropagidae	Pontellidae	family	Valid	accepted	Valid	accepted
Centrophorus uyato	Centrophorus zeehaani	species	Valid	accepted	Valid	accepted
Centropyge bispinosa	Centropyge vrolikii	species	Valid	accepted	Valid	accepted
Cephalopholis nigripinnis	Cephalopholis urodeta	species	Valid	accepted	Valid	accepted
Cephalopholis nigripinnis	Cephalopholis urodeta	species	Valid	accepted	Valid	accepted
Cephalopholis nigripinnis	Cephalopholis urodeta	species	Valid	accepted	Valid	accepted
Cephalopholis nigripinnis	Cephalopholis urodeta	species	Valid	accepted	Valid	accepted
Cephalopholis nigripinnis	Cephalopholis urodeta	species	Valid	accepted	Valid	accepted
Cephalopholis nigripinnis	Cephalopholis urodeta	species	Valid	accepted	Valid	accepted
Cephalopholis nigripinnis	Cephalopholis urodeta	species	Valid	accepted	Valid	accepted
Cephalopholis nigripinnis	Cephalopholis urodeta	species	Valid	accepted	Valid	accepted
Cephalopholis urodeta	Cephalopholis nigripinnis	species	Valid	accepted	Valid	accepted
Cephalopholis urodeta	Cephalopholis nigripinnis	species	Valid	accepted	Valid	accepted
Cephaloscyllium albipinnum	Cephaloscyllium variegatum	species	Valid	accepted	Valid	accepted
Ceratias holboelli	Ceratias tentaculatus	species	Valid	accepted	Valid	accepted
Cerithidea	Pirenella	genus	Valid	accepted	Valid	accepted
Chaceon imperialis	Chaceon granulatus	species	Valid	accepted	Valid	accepted
Chaceon imperialis	Chaceon granulatus	species	Valid	accepted	Valid	accepted
Chaceon imperialis	Chaceon granulatus	species	Valid	accepted	Valid	accepted
Chaetodon melapterus	Chaetodon trifasciatus	species	Valid	accepted	Valid	accepted
Cheilopogon arcticeps	Cheilopogon intermedius	species	Valid	accepted	Valid	accepted
Chelonibia patula	Chelonibia testudinaria	species	Valid	accepted	Valid	unaccepted
Chelonibia patula	Chelonibia testudinaria	species	Valid	accepted	Valid	unaccepted
Chelonibia patula	Chelonibia testudinaria	species	Valid	accepted	Valid	unaccepted
Chelonibia patula	Chelonibia testudinaria	species	Valid	accepted	Valid	unaccepted
Chelonibia patula	Chelonibia testudinaria	species	Valid	accepted	Valid	unaccepted
Chelonibia patula	Chelonibia testudinaria	species	Valid	accepted	Valid	unaccepted
Chelonibia patula	Chelonibia testudinaria	species	Valid	accepted	Valid	unaccepted
Chelonibia patula	Chelonibia testudinaria	species	Valid	accepted	Valid	unaccepted
Chelonibia patula	Chelonibia testudinaria	species	Valid	accepted	Valid	unaccepted
Chionoecetes japonicus	Chionoecetes angulatus	species	Valid	accepted	Valid	accepted
Chirolophis decoratus	Chirolophis nugator	species	Valid	accepted	Valid	accepted
Chlorurus japanensis	Chlorurus capistratoides	species	Valid	accepted	Valid	accepted
Chondrocladia gigantea	Chondrocladia grandis	species	Valid	alternative representation	Valid	alternative representation
Chromis circumaurea	Chromis abyssus	species	Valid	accepted	Valid	accepted
Chromis circumaurea	Chromis abyssus	species	Valid	accepted	Valid	accepted
Chromis opercularis	Chromis nigrura	species	Valid	unaccepted	Valid	accepted
Chromodoris striatella	Chromodoris lineolata	species	Valid	accepted	Valid	accepted
Chrysiptera brownriggii	Chrysiptera leucopoma	species	Valid	unaccepted	Valid	accepted
Chrysogorgia octagonos	Chrysogorgia chryseis	species	Valid	superseded combination	Valid	superseded combination
Cichliformes	Beloniformes	order	Valid	accepted	Valid	accepted
Cinachyra antarctica	Cinachyra barbata	species	Valid	accepted	Valid	accepted
Citharichthys sordidus	Citharichthys stigmaeus	species	Valid	accepted	Valid	accepted
Cladiella krempfi	Cladiella pachyclados	species	Valid	accepted	Valid	accepted
Cladiella krempfi	Cladiella latissima	species	Valid	accepted	Valid	accepted
Clarias batrachus	Clarias macrocephalus	species	Valid	accepted	Valid	accepted
Clavus rugizonatus	Clavus exasperatus	species	Valid	accepted	Valid	accepted
Clinocottus acuticeps	Clinocottus embryum	species	Valid	accepted	Valid	accepted
Cliona viridis	Cliona celata	species	Valid	accepted	Valid	accepted
Clupeidae	Pristigasteridae	family	Valid	accepted	Valid	accepted
Coelorinchus	Coryphaenoides	genus	Valid	accepted	Valid	accepted
Coilia macrognathos	Coilia nasus	species	Valid	accepted	Valid	accepted
Colossendeis megalonyx	Colossendeis tortipalpis	species	Valid	accepted	Valid	accepted
Conus mucronatus	Conus sutanorcum	species	Valid	accepted	Valid	accepted
Conus sanguinolentus	Conus lividus	species	Valid	accepted	Valid	unaccepted
Corallium	Pleurocorallium	genus	Valid	accepted	Valid	accepted
Corallium japonicum	Corallium tortuosum	species	Valid	accepted	Valid	accepted
Corallium tortuosum	Corallium nix	species	Valid	accepted	Valid	accepted
Coris cuvieri	Coris gaimard	species	Valid	accepted	Valid	accepted
Coryphaenoides rudis	Coryphaenoides murrayi	species	Valid	accepted	Valid	accepted
Crassicorophium crassicorne	Crassicorophium bonellii	species	Valid	accepted	Valid	accepted
Crassostrea	Magallana	genus	Valid	accepted	Valid	accepted
Crassostrea	Magallana	genus	Valid	accepted	Valid	accepted
Crenimugil buchanani	Crenimugil seheli	species	Valid	accepted	Valid	accepted
Cryptocentrus leptocephalus	Cryptocentrus melanopus	species	Valid	accepted	Valid	accepted
Ctenactis albitentaculata	Ctenactis echinata	species	Valid	accepted	Valid	accepted
Cyclopoida	Harpacticoida	order	Valid	accepted	Valid	accepted
Cyclopteropsis	Eumicrotremus	genus	Valid	accepted	Valid	accepted
Cyclopteropsis	Eumicrotremus	genus	Valid	accepted	Valid	accepted
Cycloseris	Lobactis	genus	Valid	accepted	Valid	accepted
Cycloseris costulata	Cycloseris vaughani	species	Valid	accepted	Valid	accepted
Cycloseris cyclolites	Cycloseris mokai	species	Valid	accepted	Valid	accepted
Cycloseris explanulata	Cycloseris wellsi	species	Valid	accepted	Valid	accepted
Cycloseris sinensis	Cycloseris costulata	species	Valid	accepted	Valid	accepted
Cycloseris wellsi	Cycloseris explanulata	species	Valid	accepted	Valid	accepted
Cycloteuthidae	Chiroteuthidae	family	Valid	accepted	Valid	accepted
Cyclothone parapallida	Cyclothone pseudopallida	species	Valid	accepted	Valid	accepted
Cyphastrea chalcidicum	Cyphastrea serailia	species	Valid	accepted	Valid	accepted
Cyphastrea serailia	Cyphastrea chalcidicum	species	Valid	accepted	Valid	accepted
Cyphastrea serailia	Cyphastrea chalcidicum	species	Valid	accepted	Valid	accepted
Cyphastrea serailia	Cyphastrea chalcidicum	species	Valid	accepted	Valid	accepted
Cypselurus oligolepis	Cypselurus naresii	species	Valid	accepted	Valid	accepted
Dactyloptena orientalis	Dactyloptena papilio	species	Valid	accepted	Valid	accepted
Dardanus sanguinocarpus	Dardanus lagopodes	species	Valid	accepted	Valid	accepted
Deania calcea	Deania hystricosa	species	Valid	accepted	Valid	unaccepted
Deania calcea	Deania hystricosa	species	Valid	accepted	Valid	unaccepted
Deania calcea	Deania hystricosa	species	Valid	accepted	Valid	unaccepted
Deania hystricosa	Deania calcea	species	Valid	unaccepted	Valid	accepted
Decapterus	Selar	genus	Valid	accepted	Valid	accepted
Decapterus akaadsi	Decapterus maruadsi	species	Valid	accepted	Valid	accepted
Decapterus kurroides	Decapterus maruadsi	species	Valid	accepted	Valid	accepted
Delphinidae	Phocoenidae	family	Valid	accepted	Valid	accepted
Delphinus delphis	Delphinus capensis	species	Valid	nomen dubium	Valid	accepted
Deveximentum	Leiognathus	genus	Valid	accepted	Valid	accepted
Deveximentum	Leiognathus	genus	Valid	accepted	Valid	accepted
Deveximentum indicium	Deveximentum insidiator	species	Valid	accepted	Valid	accepted
Deveximentum insidiator	Deveximentum indicium	species	Valid	accepted	Valid	accepted
Diagramma	Plectorhinchus	genus	Valid	accepted	Valid	accepted
Diagramma melanacrum	Diagramma picta	species	Valid	unaccepted	Valid	accepted
Diaphus meadi	Diaphus parri	species	Valid	accepted	Valid	accepted
Dichotella	Junceella	genus	Valid	accepted	Valid	accepted
Diodon eydouxii	Diodon hystrix	species	Valid	accepted	Valid	accepted
Diplogrammus goramensis	Diplogrammus xenicus	species	Valid	accepted	Valid	accepted
Dipsastraea	Coelastrea	genus	Valid	accepted	Valid	accepted
Dipsastraea matthaii	Dipsastraea rotumana	species	Valid	accepted	Valid	accepted
Dischistodus pseudochrysopoecilus	Dischistodus chrysopoecilus	species	Valid	accepted	Valid	accepted
Duncanopsammia axifuga	Duncanopsammia peltata	species	Valid	accepted	Valid	accepted
Echinophyllia aspera	Echinophyllia echinoporoides	species	Valid	accepted	Valid	accepted
Echinophyllia echinoporoides	Echinophyllia aspera	species	Valid	accepted	Valid	accepted
Echinophyllia orpheensis	Echinophyllia glabra	species	Valid	accepted	Valid	accepted
Echinopora	Leptoria	genus	Valid	accepted	Valid	unaccepted
Echinopora pacificus	Echinopora gemmacea	species	Valid	accepted	Valid	incorrect grammatical agreement of specific epithet
Echinostomatidae	Notocotylidae	family	Valid	accepted	Valid	accepted
Echinothrix diadema	Echinothrix calamaris	species	Valid	accepted	Valid	accepted
Electrona antarctica	Electrona subaspera	species	Valid	accepted	Valid	accepted
Eleutheronema rhadinum	Eleutheronema tetradactylum	species	Valid	accepted	Valid	accepted
Encrasicholina	Stolephorus	genus	Valid	accepted	Valid	accepted
Encrasicholina pseudoheteroloba	Encrasicholina heteroloba	species	Valid	accepted	Valid	unaccepted
Encrasicholina pseudoheteroloba	Encrasicholina heteroloba	species	Valid	accepted	Valid	unaccepted
Engyprosopon macrolepis	Engyprosopon xystrias	species	Valid	accepted	Valid	accepted
Enteroctopus megalocyathus	Enteroctopus zealandicus	species	Valid	accepted	Valid	accepted
Epigonidae	Howellidae	family	Valid	accepted	Valid	accepted
Epinephelus areolatus	Epinephelus chlorostigma	species	Valid	accepted	Valid	accepted
Epinephelus bruneus	Epinephelus moara	species	Valid	unaccepted	Valid	accepted
Epinephelus diacanthus	Epinephelus craigi	species	Valid	accepted	Valid	accepted
Epinephelus longispinis	Epinephelus maculatus	species	Valid	accepted	Valid	accepted
Epinephelus morrhua	Epinephelus coeruleopunctatus	species	Valid	accepted	Valid	accepted
Epinephelus tauvina	Epinephelus coioides	species	Valid	accepted	Valid	accepted
Epizoanthus xenomorphoideus	Epizoanthus gorgonus	species	Valid	accepted	Valid	accepted
Equulites leuciscus	Equulites lineolatus	species	Valid	accepted	Valid	accepted
Eriocheir sinensis	Eriocheir japonica	species	Valid	accepted	Valid	accepted
Etelis	Aphareus	genus	Valid	accepted	Valid	accepted
Etmopterus lucifer	Etmopterus pusillus	species	Valid	accepted	Valid	accepted
Etmopterus lucifer	Etmopterus pusillus	species	Valid	accepted	Valid	accepted
Etmopterus molleri	Etmopterus pusillus	species	Valid	accepted	Valid	accepted
Etmopterus pusillus	Etmopterus bigelowi	species	Valid	accepted	Valid	accepted
Eudyptes chrysolophus	Eudyptes schlegeli	species	Valid	accepted	Valid	accepted
Eudyptes chrysolophus	Eudyptes schlegeli	species	Valid	accepted	Valid	accepted
Eudyptes schlegeli	Eudyptes chrysolophus	species	Valid	accepted	Valid	accepted
Eumicrotremus	Lethotremus	genus	Valid	accepted	Valid	accepted
Eumunida karubar	Eumunida parva	species	Valid	junior subjective synonym	Valid	junior subjective synonym
Euphyllia glabrescens	Euphyllia cristata	species	Valid	accepted	Valid	accepted
Euphyllidae	Caryophylliidae	family	Valid	accepted	Valid	junior homonym
Favites	Platygyra	genus	Valid	accepted	Valid	accepted
Favites	Platygyra	genus	Valid	accepted	Valid	accepted
Favites	Paragoniastrea	genus	Valid	accepted	Valid	accepted
Favites chinensis	Favites magnistellata	species	Valid	accepted	Valid	accepted
Favites complanata	Favites pentagona	species	Valid	accepted	Valid	accepted
Favonigobius	Oxyurichthys	genus	Valid	accepted	Valid	accepted
Fimbriaphyllia ancora	Fimbriaphyllia divisa	species	Valid	accepted	Valid	accepted
Fusitriton oregonensis	Fusitriton magellanicus	species	Valid	accepted	Valid	accepted
Gadiformes	Acropomatiformes	order	Valid	accepted	Valid	accepted
Gadiformes	Perciformes	order	Valid	accepted	Valid	accepted
Gadus macrocephalus	Gadus morhua	species	Valid	accepted	Valid	accepted
Galathea aegyptiaca	Galathea consobrina	species	Valid	accepted	Valid	accepted
Galaxea paucisepta	Galaxea astreata	species	Valid	accepted	Valid	accepted
Gasterosteus aculeatus	Gasterosteus gymnurus	species	Valid	unaccepted	Valid	accepted
Gasterosteus aculeatus	Gasterosteus gymnurus	species	Valid	unaccepted	Valid	accepted
Gasterosteus gymnurus	Gasterosteus aculeatus	species	Valid	accepted	Valid	unaccepted
Gerres oyena	Gerres oblongus	species	Valid	accepted	Valid	accepted
Glossogobius circumspectus	Glossogobius olivaceus	species	Valid	accepted	Valid	accepted
Glossogobius olivaceus	Glossogobius circumspectus	species	Valid	accepted	Valid	accepted
Glyphus	Eupasiphae	genus	Valid	accepted	Valid	accepted
Gnatholepis thompsoni	Gnatholepis cauerensis	species	Valid	accepted	Valid	accepted
Gnatholepis thompsoni	Gnatholepis cauerensis	species	Valid	accepted	Valid	accepted
Gnatholepis thompsoni	Gnatholepis cauerensis	species	Valid	accepted	Valid	accepted
Gnatholepis thompsoni	Gnatholepis cauerensis	species	Valid	accepted	Valid	accepted
Gobiodon histrio	Gobiodon axillaris	species	Valid	accepted	Valid	accepted
Goniastrea edwardsi	Goniastrea pectinata	species	Valid	accepted	Valid	accepted
Goniopora burgosi	Goniopora tenuidens	species	Valid	accepted	Valid	accepted
Goniopora djiboutiensis	Goniopora lobata	species	Valid	accepted	Valid	accepted
Goniopora djiboutiensis	Goniopora lobata	species	Valid	accepted	Valid	accepted
Goniopora norfolkensis	Goniopora somaliensis	species	Valid	accepted	Valid	accepted
Gymnocranius elongatus	Gymnocranius audleyi	species	Valid	accepted	Valid	accepted
Gymnocranius microdon	Gymnocranius griseus	species	Valid	accepted	Valid	accepted
Gymnothorax porphyreus	Gymnothorax obesus	species	Valid	accepted	Valid	accepted
Gymnothorax pseudothyrsoideus	Gymnothorax reevesii	species	Valid	accepted	Valid	accepted
Gymnothorax pseudothyrsoideus	Gymnothorax reevesii	species	Valid	accepted	Valid	accepted
Halgerda malesso	Halgerda okinawa	species	Valid	accepted	Valid	accepted
Haliotis discus	Haliotis madaka	species	Valid	accepted	Valid	accepted
Haliotis discus	Haliotis madaka	species	Valid	accepted	Valid	accepted
Haliotis discus	Haliotis madaka	species	Valid	accepted	Valid	accepted
Haliotis discus	Haliotis madaka	species	Valid	accepted	Valid	accepted
Haliotis discus	Haliotis madaka	species	Valid	accepted	Valid	accepted
Haliotis discus	Haliotis madaka	species	Valid	accepted	Valid	accepted
Haliotis discus	Haliotis madaka	species	Valid	accepted	Valid	accepted
Haliotis discus	Haliotis madaka	species	Valid	accepted	Valid	accepted
Haliotis discus	Haliotis madaka	species	Valid	accepted	Valid	accepted
Haliotis gigantea	Haliotis discus	species	Valid	accepted	Valid	accepted
Haliotis madaka	Haliotis gigantea	species	Valid	accepted	Valid	accepted
Halipteris willemoesi	Halipteris californica	species	Valid	unaccepted	Valid	unaccepted
Haplosclerida	Tethyida	order	Valid	accepted	Valid	accepted
Helice latimera	Helice tientsinensis	species	Valid	accepted	Valid	accepted
Helice latimera	Helice tientsinensis	species	Valid	accepted	Valid	accepted
Helice tientsinensis	Helice tridens	species	Valid	accepted	Valid	accepted
Helice tientsinensis	Helice tridens	species	Valid	accepted	Valid	accepted
Helice tientsinensis	Helice latimera	species	Valid	accepted	Valid	accepted
Helice tientsinensis	Helice latimera	species	Valid	accepted	Valid	accepted
Hemicorallium imperiale	Hemicorallium laauense	species	Valid	accepted	Valid	accepted
Hemicorallium imperiale	Hemicorallium laauense	species	Valid	accepted	Valid	accepted
Hemicorallium imperiale	Hemicorallium laauense	species	Valid	accepted	Valid	accepted
Hemicorallium laauense	Hemicorallium imperiale	species	Valid	accepted	Valid	accepted
Hemicorallium laauense	Hemicorallium regale	species	Valid	accepted	Valid	accepted
Hemicorallium regale	Hemicorallium laauense	species	Valid	accepted	Valid	accepted
Herklotsichthys	Sardinella	genus	Valid	accepted	Valid	accepted
Heteropriacanthus carolinus	Heteropriacanthus cruentatus	species	Valid	accepted	Valid	unaccepted
Heteropriacanthus cruentatus	Heteropriacanthus carolinus	species	Valid	unaccepted	Valid	accepted
Heteropriacanthus cruentatus	Heteropriacanthus carolinus	species	Valid	unaccepted	Valid	accepted
Heteropriacanthus cruentatus	Heteropriacanthus carolinus	species	Valid	unaccepted	Valid	accepted
Heteropsammia eupsammides	Heteropsammia cochlea	species	Valid	accepted	Valid	accepted
Himantolophus stewarti	Himantolophus appelii	species	Valid	accepted	Valid	accepted
Hippocampus angustus	Hippocampus subelongatus	species	Valid	accepted	Valid	accepted
Hippocampus kuda	Hippocampus barbouri	species	Valid	accepted	Valid	accepted
Hippoglossoides dubius	Hippoglossoides robustus	species	Valid	accepted	Valid	accepted
Hippoglossoides robustus	Hippoglossoides elassodon	species	Valid	accepted	Valid	accepted
Hippoglossoides robustus	Hippoglossoides elassodon	species	Valid	accepted	Valid	accepted
Hologymnosus annulatus	Hologymnosus doliatus	species	Valid	accepted	Valid	accepted
Hologymnosus annulatus	Hologymnosus doliatus	species	Valid	accepted	Valid	accepted
Hydnophora exesa	Hydnophora grandis	species	Valid	accepted	Valid	accepted
Hydroides adamaformis	Hydroides tuberculata	species	Valid	accepted	Valid	accepted
Hydroides amri	Hydroides exaltata	species	Valid	accepted	Valid	accepted
Hydroides basispinosa	Hydroides gradata	species	Valid	unaccepted	Valid	accepted
Hydroides dianthus	Hydroides sanctaecrucis	species	Valid	accepted	Valid	accepted
Hydroides trivesiculosa	Hydroides tuberculata	species	Valid	accepted	Valid	accepted
Hymeniacidon perlevis	Hymeniacidon sinapium	species	Valid	unaccepted	Valid	accepted
Hyperiella antarctica	Hyperiella dilatata	species	Valid	accepted	Valid	accepted
Hyperoglyphe	Schedophilus	genus	Valid	accepted	Valid	accepted
Hypophthalmichthys molitrix	Hypophthalmichthys nobilis	species	Valid	accepted	Valid	accepted
Hypophthalmichthys molitrix	Hypophthalmichthys nobilis	species	Valid	accepted	Valid	accepted
Hypophthalmichthys molitrix	Hypophthalmichthys nobilis	species	Valid	accepted	Valid	accepted
Hypophthalmichthys molitrix	Hypophthalmichthys nobilis	species	Valid	accepted	Valid	accepted
Hyporhamphus australis	Hyporhamphus melanochir	species	Valid	accepted	Valid	accepted
Hyporhamphus melanochir	Hyporhamphus australis	species	Valid	accepted	Valid	accepted
Hyporhamphus melanochir	Hyporhamphus australis	species	Valid	accepted	Valid	accepted
Hyporthodus ergastularius	Hyporthodus octofasciatus	species	Valid	accepted	Valid	accepted
Hypseleotris guentheri	Hypseleotris cyprinoides	species	Valid	accepted	Valid	accepted
Iotyrris	Lophiotoma	genus	Valid	accepted	Valid	junior subjective synonym
Iphione henshawi	Iphione ovata	species	Valid	accepted	Valid	accepted
Ircinia dendroides	Ircinia variabilis	species	Valid	accepted	Valid	accepted
Ircinia ramodigitata	Ircinia ramosa	species	Valid	accepted	Valid	accepted
Ischnochiton comptus	Ischnochiton boninensis	species	Valid	accepted	Valid	accepted
Ischnochitonidae	Mopaliidae	family	Valid	accepted	Valid	accepted
Istiophoriformes	Scombriformes	order	Valid	accepted	Error	NA
Jassa slatteryi	Jassa marmorata	species	Valid	accepted	Valid	accepted
Johnius dussumieri	Johnius grypotus	species	Valid	accepted	Valid	unaccepted
Kajikia	Istiophorus	genus	Valid	accepted	Valid	accepted
Kali	Chiasmodon	genus	Valid	accepted	Valid	accepted
Klyxum	Cladiella	genus	Valid	accepted	Valid	accepted
Konosirus	Nematalosa	genus	Valid	accepted	Valid	accepted
Kumococius	Grammoplites	genus	Valid	accepted	Valid	accepted
Kumococius	Inegocia	genus	Valid	accepted	Valid	accepted
Kyphosus sectatrix	Kyphosus bigibbus	species	Valid	accepted	Valid	accepted
Labracinus lineatus	Labracinus cyclophthalmus	species	Valid	accepted	Valid	accepted
Labriformes	Lutjaniformes	order	Error	NA	Error	NA
Lagocephalus cheesemanii	Lagocephalus gloveri	species	Valid	accepted	Valid	accepted
Lampanyctus	Nannobrachium	genus	Valid	accepted	Valid	accepted
Lampris guttatus	Lampris megalopsis	species	Valid	accepted	Valid	accepted
Lampris guttatus	Lampris australensis	species	Valid	accepted	Valid	accepted
Larimichthys	Chrysochir	genus	Valid	accepted	Valid	accepted
Lateolabracidae	Monodactylidae	family	Valid	accepted	Valid	accepted
Lateolabrax japonicus	Lateolabrax maculatus	species	Valid	unaccepted	Valid	accepted
Lauriea simulata	Lauriea punctata	species	Valid	accepted	Valid	accepted
Leiognathus	Deveximentum	genus	Valid	accepted	Valid	accepted
Leiognathus	Nuchequula	genus	Valid	accepted	Valid	accepted
Leiognathus	Nuchequula	genus	Valid	accepted	Valid	accepted
Lendenfeldia	Strepsichordaia	genus	Valid	accepted	Valid	accepted
Lepidonotothen squamifrons	Lepidonotothen kempi	species	Valid	unaccepted	Valid	accepted
Leptastrea pruinosa	Leptastrea transversa	species	Valid	accepted	Valid	junior subjective synonym
Leptodius	Chlorodiella	genus	Valid	accepted	Valid	accepted
Leptoscarus	Scarus	genus	Valid	accepted	Valid	accepted
Leptoseris scabra	Leptoseris incrustans	species	Valid	accepted	Valid	accepted
Leptoseris scabra	Leptoseris explanata	species	Valid	accepted	Valid	accepted
Leptostomias	Flagellostomias	genus	Valid	accepted	Valid	accepted
Lestidiops	Stemonosudis	genus	Valid	accepted	Valid	accepted
Lethrinus mahsena	Lethrinus amboinensis	species	Valid	accepted	Valid	accepted
Limacina helicina	Limacina retroversa	species	Valid	accepted	Valid	accepted
Liparidae	Zoarcidae	family	Valid	accepted	Valid	accepted
Lissoclinum bistratum	Lissoclinum timorense	species	Valid	accepted	Valid	accepted
Lithophyllon	Danafungia	genus	Valid	accepted	Valid	accepted
Lithophyllon repanda	Lithophyllon concinna	species	Valid	accepted	Valid	accepted
Lithophyllon undulatum	Lithophyllon scabra	species	Valid	accepted	Valid	accepted
Liza	Chelon	genus	Valid	accepted	Valid	uncertain
Lobophyllia	Acanthastrea	genus	Valid	accepted	Valid	accepted
Lobophyllia radians	Lobophyllia recta	species	Valid	accepted	Valid	accepted
Lobophyllia radians	Lobophyllia recta	species	Valid	accepted	Valid	accepted
Lobophyllia recta	Lobophyllia radians	species	Valid	accepted	Valid	accepted
Lobophyllia rowleyensis	Lobophyllia vitiensis	species	Valid	accepted	Valid	accepted
Lobophyllia rowleyensis	Lobophyllia vitiensis	species	Valid	accepted	Valid	accepted
Lobophytum catalai	Lobophytum verum	species	Valid	accepted	Valid	accepted
Lobophytum crassum	Lobophytum legitimum	species	Valid	accepted	Valid	accepted
Loboprimnoa	Primnoa	genus	Valid	accepted	Valid	accepted
Loliolus japonica	Loliolus beka	species	Valid	accepted	Valid	accepted
Lophiotoma picturata	Lophiotoma acuta	species	Valid	accepted	Valid	accepted
Lottia tenuisculpta	Lottia kogamogai	species	Valid	accepted	Valid	accepted
Luidia longispina	Luidia hardwicki	species	Valid	accepted	Valid	accepted
Luidia quinaria	Luidia changi	species	Valid	accepted	Valid	accepted
Lunella coronata	Lunella granulata	species	Valid	accepted	Valid	accepted
Lunella coronata	Lunella correensis	species	Valid	accepted	Valid	accepted
Lunella granulata	Lunella correensis	species	Valid	accepted	Valid	accepted
Lutjanus bengalensis	Lutjanus notatus	species	Valid	accepted	Valid	accepted
Lutjanus erythropterus	Lutjanus malabaricus	species	Valid	accepted	Valid	accepted
Lutjanus lutjanus	Lutjanus monostigma	species	Valid	accepted	Valid	accepted
Lutjanus malabaricus	Lutjanus erythropterus	species	Valid	accepted	Valid	accepted
Lutjanus malabaricus	Lutjanus erythropterus	species	Valid	accepted	Valid	accepted
Lutjanus malabaricus	Lutjanus gibbus	species	Valid	accepted	Valid	accepted
Lutjanus monostigma	Lutjanus russellii	species	Valid	accepted	Valid	accepted
Lutjanus vitta	Lutjanus ophuysenii	species	Valid	accepted	Valid	accepted
Macronectes giganteus	Macronectes halli	species	Valid	accepted	Valid	accepted
Macropodia parva	Macropodia rostrata	species	Valid	accepted	Valid	junior subjective synonym
Maculabatis	Himantura	genus	Valid	accepted	Valid	accepted
Maculabatis astra	Maculabatis toshi	species	Valid	accepted	Valid	accepted
Magallana	Crassostrea	genus	Valid	accepted	Valid	accepted
Makaira	Istiophorus	genus	Valid	accepted	Valid	accepted
Marcia	Paphia	genus	Valid	accepted	Valid	accepted
Maurolicus japonicus	Maurolicus australis	species	Valid	accepted	Valid	accepted
Melanolagus	Bathylagus	genus	Valid	accepted	Valid	accepted
Meretrix petechialis	Meretrix meretrix	species	Valid	accepted	Valid	accepted
Meretrix petechialis	Meretrix meretrix	species	Valid	accepted	Valid	accepted
Merulina	Goniastrea	genus	Valid	accepted	Valid	accepted
Merulinidae	Lobophylliidae	family	Valid	junior objective synonym	Valid	junior objective synonym
Metapenaeus monoceros	Metapenaeus ensis	species	Valid	accepted	Valid	accepted
Metapenaeus monoceros	Metapenaeus ensis	species	Valid	accepted	Valid	accepted
Metridia pacifica	Metridia lucens	species	Valid	alternative representation	Valid	accepted
Metridia pacifica	Metridia lucens	species	Valid	alternative representation	Valid	accepted
Metridia pacifica	Metridia lucens	species	Valid	alternative representation	Valid	accepted
Metridia pacifica	Metridia lucens	species	Valid	alternative representation	Valid	accepted
Metridia pacifica	Metridia lucens	species	Valid	alternative representation	Valid	accepted
Micrelenchus	Cantharidus	genus	Valid	accepted	Valid	accepted
Micromussa amakusensis	Micromussa lordhowensis	species	Valid	accepted	Valid	accepted
Mierspenaeopsis	Penaeus	genus	Valid	accepted	Valid	accepted
Millepora platyphylla	Millepora dichotoma	species	Valid	accepted	Valid	accepted
Minous quincarinatus	Minous pictus	species	Valid	accepted	Valid	accepted
Mobula mobular	Mobula japanica	species	Valid	junior subjective synonym	Valid	accepted
Monodactylidae	Terapontidae	family	Valid	accepted	Valid	accepted
Monodactylidae	Terapontidae	family	Valid	accepted	Valid	accepted
Monodontidae	Phocoenidae	family	Valid	accepted	Valid	accepted
Montipora digitata	Montipora efflorescens	species	Valid	accepted	Valid	accepted
Montipora patula	Montipora verrilli	species	Valid	accepted	Valid	accepted
Moolgarda cunnesius	Moolgarda perusii	species	Valid	unaccepted	Valid	unaccepted
Mugil liza	Mugil platanus	species	Valid	unaccepted	Valid	accepted
Mugil platanus	Mugil liza	species	Valid	accepted	Valid	unaccepted
Mugiliformes	Carangiformes	order	Valid	accepted	Valid	accepted
Muraenichthys	Ophichthus	genus	Valid	accepted	Valid	accepted
Musculus discors	Musculus niger	species	Valid	accepted	Valid	accepted
Mycedium	Pectinia	genus	Valid	unavailable name	Valid	unavailable name
Mycteroperca	Epinephelus	genus	Valid	accepted	Valid	accepted
Myliobatiformes	Carcharhiniformes	order	Valid	accepted	Valid	accepted
Myripristis	Neoniphon	genus	Valid	accepted	Valid	accepted
Myripristis berndti	Myripristis earlei	species	Valid	accepted	Valid	accepted
Myripristis berndti	Myripristis murdjan	species	Valid	accepted	Valid	accepted
Mytilus edulis	Mytilus galloprovincialis	species	Valid	accepted	Valid	accepted
Mytilus edulis	Mytilus galloprovincialis	species	Valid	accepted	Valid	accepted
Mytilus edulis	Mytilus trossulus	species	Valid	accepted	Valid	accepted
Mytilus trossulus	Mytilus galloprovincialis	species	Valid	accepted	Valid	accepted
Myurella	Hastulopsis	genus	Valid	accepted	Valid	accepted
Myurella	Hastulopsis	genus	Valid	accepted	Valid	accepted
Myurellopsis undulata	Myurellopsis parkinsoni	species	Valid	accepted	Valid	accepted
Nacella deaurata	Nacella delicatissima	species	Valid	unaccepted	Valid	accepted
Nacella deaurata	Nacella fuegiensis	species	Valid	unaccepted	Valid	accepted
Nacella deaurata	Nacella fuegiensis	species	Valid	unaccepted	Valid	accepted
Nacella deaurata	Nacella delicatissima	species	Valid	unaccepted	Valid	accepted
Nacella deaurata	Nacella fuegiensis	species	Valid	unaccepted	Valid	accepted
Nacella fuegiensis	Nacella magellanica	species	Valid	accepted	Valid	unaccepted
Nacella magellanica	Nacella delicatissima	species	Valid	unaccepted	Valid	accepted
Nacella magellanica	Nacella deaurata	species	Valid	accepted	Valid	accepted
Nacella venosa	Nacella chiloensis	species	Valid	unaccepted	Valid	unaccepted
Nacella venosa	Nacella chiloensis	species	Valid	unaccepted	Valid	unaccepted
Nacella venosa	Nacella chiloensis	species	Valid	unaccepted	Valid	unaccepted
Nacella venosa	Nacella chiloensis	species	Valid	unaccepted	Valid	unaccepted
Nacella venosa	Nacella chiloensis	species	Valid	unaccepted	Valid	unaccepted
Nacella venosa	Nacella chiloensis	species	Valid	unaccepted	Valid	unaccepted
Nacella venosa	Nacella chiloensis	species	Valid	unaccepted	Valid	unaccepted
Nacella venosa	Nacella chiloensis	species	Valid	unaccepted	Valid	unaccepted
Nannobrachium achirus	Nannobrachium atrum	species	Valid	unaccepted	Valid	unaccepted
Nannosalarias	Entomacrodus	genus	Valid	accepted	Valid	accepted
Nannosalarias	Entomacrodus	genus	Valid	accepted	Valid	accepted
Naso caesius	Naso hexacanthus	species	Valid	accepted	Valid	accepted
Naso caesius	Naso hexacanthus	species	Valid	accepted	Valid	accepted
Naso caesius	Naso hexacanthus	species	Valid	accepted	Valid	accepted
Naso caesius	Naso hexacanthus	species	Valid	accepted	Valid	accepted
Naso caesius	Naso hexacanthus	species	Valid	accepted	Valid	accepted
Naso caesius	Naso hexacanthus	species	Valid	accepted	Valid	accepted
Naso caesius	Naso hexacanthus	species	Valid	accepted	Valid	accepted
Naso caesius	Naso hexacanthus	species	Valid	accepted	Valid	accepted
Naso caesius	Naso hexacanthus	species	Valid	accepted	Valid	accepted
Naso caesius	Naso hexacanthus	species	Valid	accepted	Valid	accepted
Nembrotha nigerrima	Nembrotha kubaryana	species	Valid	accepted	Valid	unaccepted
Nemertesia ramosa	Nemertesia antennina	species	Valid	accepted	Valid	accepted
Neocancilla clathrus	Neocancilla maculosa	species	Valid	accepted	Valid	accepted
Neoglyphidodon	Hemiglyphidodon	genus	Valid	accepted	Valid	accepted
Neoniphon	Sargocentron	genus	Valid	accepted	Valid	accepted
Neoscopelus microchir	Neoscopelus macrolepidotus	species	Valid	accepted	Valid	accepted
Neotrygon kuhlii	Neotrygon australiae	species	Valid	accepted	Valid	accepted
Neotrygon kuhlii	Neotrygon caeruleopunctata	species	Valid	accepted	Valid	accepted
Neotrygon kuhlii	Neotrygon trigonoides	species	Valid	accepted	Valid	accepted
Neotrygon kuhlii	Neotrygon australiae	species	Valid	accepted	Valid	accepted
Odontamblyopus rubicundus	Odontamblyopus lacepedii	species	Valid	accepted	Valid	accepted
Ommatophoca	Hydrurga	genus	Valid	accepted	Valid	accepted
Onychoteuthis banksii	Onychoteuthis lacrima	species	Valid	accepted	Valid	accepted
Ophiocamax applicatus	Ophiocamax brevicetra	species	Valid	accepted	Valid	accepted
Ophiopholis aculeata	Ophiopholis kennerlyi	species	Valid	accepted	Valid	accepted
Oreochromis	Sarotherodon	genus	Valid	accepted	Valid	accepted
Oreochromis	Sarotherodon	genus	Valid	accepted	Valid	accepted
Oreochromis aureus	Oreochromis niloticus	species	Valid	accepted	Valid	accepted
Oreochromis mossambicus	Oreochromis niloticus	species	Valid	accepted	Valid	accepted
Oreochromis mossambicus	Oreochromis niloticus	species	Valid	accepted	Valid	accepted
Oreochromis niloticus	Oreochromis mossambicus	species	Valid	accepted	Valid	accepted
Oreochromis niloticus	Oreochromis aureus	species	Valid	accepted	Valid	accepted
Oreochromis niloticus	Oreochromis aureus	species	Valid	accepted	Valid	accepted
Ostrea stentina	Ostrea equestris	species	Valid	accepted	Valid	accepted
Oulophyllia crispa	Oulophyllia bennettae	species	Valid	accepted	Valid	accepted
Oulophyllia crispa	Oulophyllia bennettae	species	Valid	accepted	Valid	accepted
Oulophyllia levis	Oulophyllia crispa	species	Valid	accepted	Valid	accepted
Oxymeris crenulata	Oxymeris dimidiata	species	Valid	accepted	Valid	accepted
Oxymeris dimidiata	Oxymeris crenulata	species	Valid	accepted	Valid	accepted
Oxypora	Echinophyllia	genus	Valid	accepted	Valid	accepted
Oxypora lacera	Oxypora echinata	species	Valid	accepted	Valid	accepted
Oxypora lacera	Oxypora echinata	species	Valid	accepted	Valid	accepted
Oxypora lacera	Oxypora crassispinosa	species	Valid	accepted	Valid	accepted
Oxyurichthys	Chaeturichthys	genus	Valid	accepted	Valid	accepted
Palythoa mutuki	Palythoa tuberculosa	species	Valid	accepted	Valid	accepted
Pampus argenteus	Pampus echinogaster	species	Valid	unaccepted	Valid	accepted
Pampus argenteus	Pampus echinogaster	species	Valid	unaccepted	Valid	accepted
Pampus argenteus	Pampus echinogaster	species	Valid	unaccepted	Valid	accepted
Pampus argenteus	Pampus echinogaster	species	Valid	unaccepted	Valid	accepted
Pampus argenteus	Pampus echinogaster	species	Valid	unaccepted	Valid	accepted
Pampus argenteus	Pampus echinogaster	species	Valid	unaccepted	Valid	accepted
Pampus argenteus	Pampus echinogaster	species	Valid	unaccepted	Valid	accepted
Pampus argenteus	Pampus echinogaster	species	Valid	unaccepted	Valid	accepted
Pampus cinereus	Pampus punctatissimus	species	Valid	accepted	Valid	accepted
Pampus cinereus	Pampus punctatissimus	species	Valid	accepted	Valid	accepted
Pampus cinereus	Pampus punctatissimus	species	Valid	accepted	Valid	accepted
Paracalanus indicus	Paracalanus quasimodo	species	Valid	accepted	Valid	accepted
Paracalanus indicus	Paracalanus quasimodo	species	Valid	accepted	Valid	accepted
Paragoniastrea russelli	Paragoniastrea deformis	species	Valid	accepted	Valid	accepted
Paraliparis dactylosus	Paraliparis grandis	species	Valid	accepted	Valid	accepted
Paramugil	Planiliza	genus	Valid	accepted	Valid	accepted
Parapercis decemfasciata	Parapercis multifasciata	species	Valid	accepted	Valid	accepted
Parapercis maculata	Parapercis pulchella	species	Valid	accepted	Valid	accepted
Paraplagusia japonica	Paraplagusia guttata	species	Valid	accepted	Valid	accepted
Parastenella pacifica	Parastenella ramosa	species	Valid	accepted	Valid	accepted
Parastenella ramosa	Parastenella gymnogaster	species	Valid	accepted	Valid	accepted
Parexocoetus brachypterus	Parexocoetus mento	species	Valid	accepted	Valid	accepted
Parupeneus macronemus	Parupeneus barberinus	species	Valid	accepted	Valid	accepted
Pavona	Leptoseris	genus	Valid	accepted	Valid	accepted
Pavona	Leptoseris	genus	Valid	accepted	Valid	accepted
Pavona cactus	Pavona gigantea	species	Valid	accepted	Valid	accepted
Pavona danai	Pavona cactus	species	Valid	accepted	Valid	accepted
Pectinia	Mycedium	genus	Valid	unavailable name	Valid	unavailable name
Pectinia alcicornis	Pectinia paeonia	species	Valid	accepted	Valid	accepted
Pectinodontidae	Acmaeidae	family	Valid	accepted	Valid	accepted
Pempheris oualensis	Pempheris adusta	species	Valid	accepted	Valid	accepted
Pempheris schwenkii	Pempheris oualensis	species	Valid	accepted	Valid	accepted
Penaeus indicus	Penaeus merguiensis	species	Valid	accepted	Valid	accepted
Perciformes	Pleuronectiformes	order	Valid	accepted	Valid	accepted
Perinereis	Pseudonereis	genus	Valid	accepted	Valid	accepted
Periophthalmus	Boleophthalmus	genus	Valid	accepted	Valid	accepted
Perisesarma	Parasesarma	genus	Valid	accepted	Valid	accepted
Pervagor melanocephalus	Pervagor janthinosoma	species	Valid	accepted	Valid	accepted
Phestilla sibogae	Phestilla lugubris	species	Valid	superseded combination	Valid	superseded combination
Philippidorippe	Ethusa	genus	Valid	accepted	Valid	accepted
Photopectoralis	Nuchequula	genus	Valid	accepted	Valid	accepted
Phoxinus csikii	Phoxinus phoxinus	species	Valid	accepted	Valid	unaccepted
Phoxinus lumaireul	Phoxinus phoxinus	species	Valid	accepted	Valid	unaccepted
Phoxinus phoxinus	Phoxinus csikii	species	Valid	unaccepted	Valid	accepted
Phrosinidae	Phronimidae	family	Valid	accepted	Valid	accepted
Phyllidiella pustulosa	Phyllidiella zeylanica	species	Valid	accepted	Valid	accepted
Phyllidiidae	Chromodorididae	family	Valid	accepted	Valid	accepted
Phyllidiopsis krempfi	Phyllidiopsis burni	species	Valid	accepted	Valid	accepted
Pinguipedidae	Pomacentridae	family	Valid	accepted	Valid	accepted
Pione lampa	Pione vastifica	species	Valid	accepted	Valid	accepted
Pirenella	Cerithidea	genus	Valid	accepted	Valid	accepted
Pirenella alata	Pirenella cingulata	species	Valid	accepted	Valid	accepted
Planiliza	Paramugil	genus	Valid	accepted	Valid	accepted
Planiliza	Paramugil	genus	Valid	accepted	Valid	accepted
Planiliza	Chelon	genus	Valid	accepted	Valid	accepted
Planiliza subviridis	Planiliza macrolepis	species	Valid	accepted	Valid	accepted
Platax batavianus	Platax teira	species	Valid	accepted	Valid	accepted
Platybelone	Tylosurus	genus	Valid	accepted	Valid	accepted
Platycephalus indicus	Platycephalus cultellatus	species	Valid	accepted	Valid	accepted
Platygyra daedalea	Platygyra lamellina	species	Valid	accepted	Valid	accepted
Platygyra pini	Platygyra crosslandi	species	Valid	accepted	Valid	accepted
Platygyra pini	Platygyra crosslandi	species	Valid	accepted	Valid	accepted
Platygyra pini	Platygyra verweyi	species	Valid	accepted	Valid	accepted
Platygyra pini	Platygyra sinensis	species	Valid	accepted	Valid	accepted
Platygyra ryukyuensis	Platygyra acuta	species	Valid	accepted	Valid	accepted
Platygyra sinensis	Platygyra daedalea	species	Valid	accepted	Valid	accepted
Platynereis dumerilii	Platynereis abnormis	species	Valid	accepted	Valid	accepted
Plectorhinchus	Diagramma	genus	Valid	accepted	Valid	accepted
Plectorhinchus	Diagramma	genus	Valid	accepted	Valid	accepted
Plectropomus areolatus	Plectropomus leopardus	species	Valid	accepted	Valid	accepted
Plectropomus leopardus	Plectropomus maculatus	species	Valid	accepted	Valid	accepted
Pleurocorallium	Hemicorallium	genus	Valid	accepted	Valid	accepted
Pleurocorallium elatius	Pleurocorallium konojoi	species	Valid	accepted	Valid	accepted
Pleurocorallium konojoi	Pleurocorallium elatius	species	Valid	accepted	Valid	accepted
Pleuroloba	Ophicardelus	genus	Valid	accepted	Valid	accepted
Pleuronectiformes	Spariformes	order	Error	NA	Valid	accepted
Plicofollis polystaphylodon	Plicofollis nella	species	Valid	accepted	Valid	accepted
Pliocardia	Calyptogena	genus	Valid	accepted	Valid	accepted
Pocillopora damicornis	Pocillopora ligulata	species	Valid	accepted	Valid	accepted
Pocillopora damicornis	Pocillopora verrucosa	species	Valid	accepted	Valid	accepted
Pocillopora grandis	Pocillopora verrucosa	species	Valid	accepted	Valid	accepted
Pocillopora meandrina	Pocillopora grandis	species	Valid	accepted	Valid	accepted
Pocillopora verrucosa	Pocillopora meandrina	species	Valid	accepted	Valid	accepted
Podabacia	Sandalolitha	genus	Valid	accepted	Valid	accepted
Poecilia mexicana	Poecilia latipinna	species	Valid	accepted	Valid	accepted
Polydactylus	Eleutheronema	genus	Valid	accepted	Valid	accepted
Polyipnus elongatus	Polyipnus tridentifer	species	Valid	accepted	Valid	accepted
Pomacentrus albicaudatus	Pomacentrus chrysurus	species	Valid	accepted	Valid	accepted
Pomacentrus nagasakiensis	Pomacentrus chrysurus	species	Valid	accepted	Valid	accepted
Pomacentrus xanthosternus	Pomacentrus grammorhynchus	species	Valid	accepted	Valid	accepted
Pomadasys hasta	Pomadasys kaakan	species	Valid	accepted	Valid	unaccepted
Pomadasys kaakan	Pomadasys argenteus	species	Valid	accepted	Valid	accepted
Pomadasys kaakan	Pomadasys argenteus	species	Valid	accepted	Valid	accepted
Pontinus rhodochrous	Pontinus tentacularis	species	Valid	accepted	Valid	accepted
Porites annae	Porites evermanni	species	Valid	accepted	Valid	accepted
Porites compressa	Porites cylindrica	species	Valid	accepted	Valid	accepted
Porites compressa	Porites lobata	species	Valid	accepted	Valid	accepted
Porites compressa	Porites lobata	species	Valid	accepted	Valid	accepted
Porites evermanni	Porites lutea	species	Valid	accepted	Valid	accepted
Porites lutea	Porites compressa	species	Valid	accepted	Valid	accepted
Porites lutea	Porites rus	species	Valid	accepted	Valid	accepted
Porites monticulosa	Porites rus	species	Valid	accepted	Valid	accepted
Porites rus	Porites lichen	species	Valid	accepted	Valid	accepted
Priacanthus hamrur	Priacanthus macracanthus	species	Valid	accepted	Valid	accepted
Priolepis	Gobiodon	genus	Valid	accepted	Valid	accepted
Prionace	Carcharhinus	genus	Valid	accepted	Valid	accepted
Pristiophorus nudipinnis	Pristiophorus cirratus	species	Valid	accepted	Valid	accepted
Profundiconus smirna	Profundiconus teramachii	species	Valid	accepted	Valid	accepted
Psammocora contigua	Psammocora nierstraszi	species	Valid	accepted	Valid	accepted
Psammocora contigua	Psammocora nierstraszi	species	Valid	accepted	Valid	accepted
Psammocora haimiana	Psammocora digitata	species	Valid	accepted	Valid	accepted
Psettichthys	Parophrys	genus	Valid	accepted	Valid	accepted
Pseudobathylagus	Bathylagus	genus	Valid	accepted	Valid	accepted
Pseudocoris yamashiroi	Pseudocoris bleekeri	species	Valid	accepted	Valid	accepted
Pseudohemiculter	Pseudolaubuca	genus	Valid	unaccepted	Valid	accepted
Pseudorhombus argus	Pseudorhombus dupliciocellatus	species	Valid	accepted	Valid	accepted
Pseudorhombus arsius	Pseudorhombus elevatus	species	Valid	accepted	Valid	accepted
Pseudorhombus arsius	Pseudorhombus elevatus	species	Valid	accepted	Valid	accepted
Psilaster	Proserpinaster	genus	Valid	accepted	Valid	accepted
Pteraeolidia ianthina	Pteraeolidia semperi	species	Valid	accepted	Valid	accepted
Pterioida	Ostreida	order	Valid	accepted	Error	NA
Pterioida	Unionida	order	Valid	accepted	Error	NA
Pterocaesio marri	Pterocaesio chrysozona	species	Valid	accepted	Valid	accepted
Pterocaesio trilineata	Pterocaesio chrysozona	species	Valid	accepted	Valid	accepted
Pterois lunulata	Pterois russelii	species	Valid	accepted	Valid	accepted
Rapana venosa	Rapana bezoar	species	Valid	accepted	Valid	accepted
Reishia luteostoma	Reishia bronni	species	Valid	junior subjective synonym	Valid	accepted
Remora osteochir	Remora brachyptera	species	Valid	accepted	Valid	accepted
Rhizopsammia	Cladopsammia	genus	Valid	accepted	Valid	accepted
Rhizopsammia	Cladopsammia	genus	Valid	accepted	Valid	accepted
Rhynchorhamphus	Hyporhamphus	genus	Valid	accepted	Valid	accepted
Ringiculoides kurilensis	Ringiculoides vityazi	species	Valid	accepted	Valid	accepted
Sagartiidae	Actinostolidae	family	Valid	accepted	Valid	accepted
Salvelinus	Salmo	genus	Valid	accepted	Valid	accepted
Salvelinus alpinus	Salvelinus malma	species	Valid	accepted	Valid	accepted
Sandalia bridgesi	Sandalia triticea	species	Valid	accepted	Valid	junior subjective synonym
Sarcophyton cinereum	Sarcophyton glaucum	species	Valid	accepted	Valid	accepted
Sarcophyton cinereum	Sarcophyton glaucum	species	Valid	accepted	Valid	accepted
Sarcophyton crassum	Sarcophyton glaucum	species	Valid	accepted	Valid	accepted
Sarda	Auxis	genus	Valid	accepted	Valid	accepted
Sardinella albella	Sardinella melanura	species	Valid	accepted	Valid	accepted
Sardinella gibbosa	Sardinella jussieu	species	Valid	unaccepted	Valid	accepted
Sardinella jussieu	Sardinella gibbosa	species	Valid	accepted	Valid	unaccepted
Sardinella sindensis	Sardinella gibbosa	species	Valid	accepted	Valid	accepted
Sarotherodon	Oreochromis	genus	Valid	accepted	Valid	accepted
Saurida	Harpadon	genus	Valid	accepted	Valid	accepted
Saurida grandisquamis	Saurida undosquamis	species	Valid	accepted	Valid	unaccepted
Saurida grandisquamis	Saurida undosquamis	species	Valid	accepted	Valid	unaccepted
Saurida grandisquamis	Saurida undosquamis	species	Valid	accepted	Valid	unaccepted
Scabrotrophon inspiratus	Scabrotrophon manai	species	Valid	accepted	Valid	accepted
Scabrotrophon inspiratus	Scabrotrophon manai	species	Valid	accepted	Valid	accepted
Scarus ghobban	Scarus rivulatus	species	Valid	accepted	Valid	accepted
Scarus vetula	Scarus quoyi	species	Valid	accepted	Valid	accepted
Schedophilus	Hyperoglyphe	genus	Valid	accepted	Valid	accepted
Schizoporella pungens	Schizoporella errata	species	Valid	accepted	Valid	accepted
Scolopsis aurata	Scolopsis margaritifera	species	Valid	accepted	Valid	accepted
Scomber colias	Scomber japonicus	species	Valid	accepted	Valid	accepted
Scomber japonicus	Scomber colias	species	Valid	accepted	Valid	accepted
Scomberoides lysan	Scomberoides tol	species	Valid	accepted	Valid	accepted
Scombriformes	Gobiiformes	order	Valid	accepted	Valid	accepted
Scopelogadus beanii	Scopelogadus mizolepis	species	Valid	accepted	Valid	accepted
Scorpaenidae	Sciaenidae	family	Valid	accepted	Valid	accepted
Scorpaenopsis vittapinna	Scorpaenopsis papuensis	species	Valid	accepted	Valid	accepted
Scylla tranquebarica	Scylla serrata	species	Valid	accepted	Valid	accepted
Sebastes reedi	Sebastes ciliatus	species	Valid	accepted	Valid	accepted
Sebastiscus vibrantus	Sebastiscus tertius	species	Valid	accepted	Valid	accepted
Selaroides	Alepes	genus	Valid	accepted	Valid	accepted
Siganus argenteus	Siganus canaliculatus	species	Valid	accepted	Valid	accepted
Siganus lineatus	Siganus guttatus	species	Valid	accepted	Valid	accepted
Siganus lineatus	Siganus guttatus	species	Valid	accepted	Valid	accepted
Siganus luridus	Siganus sutor	species	Valid	accepted	Valid	accepted
Siganus unimaculatus	Siganus vulpinus	species	Valid	accepted	Valid	accepted
Sillago asiatica	Sillago sihama	species	Valid	accepted	Valid	accepted
Sillago indica	Sillago sihama	species	Valid	accepted	Valid	accepted
Sillago maculata	Sillago aeolus	species	Valid	accepted	Valid	accepted
Sinularia capillosa	Sinularia lochmodes	species	Valid	superseded combination	Valid	superseded combination
Sinularia ceramensis	Sinularia lochmodes	species	Valid	superseded combination	Valid	superseded combination
Sinularia ceramensis	Sinularia tumulosa	species	Valid	superseded combination	Valid	superseded combination
Sinularia corpulentissima	Sinularia maxima	species	Valid	superseded combination	Valid	superseded combination
Sinularia gravis	Sinularia tumulosa	species	Valid	superseded combination	Valid	superseded combination
Sinularia leptoclados	Sinularia abrupta	species	Valid	superseded combination	Valid	superseded combination
Sinularia peculiaris	Sinularia gaweli	species	Valid	superseded combination	Valid	superseded combination
Sinularia woodyensis	Sinularia ovispiculata	species	Valid	superseded combination	Valid	superseded combination
Siphonaria diemenensis	Siphonaria tasmanica	species	Valid	accepted	Valid	accepted
Siratus	Vokesimurex	genus	Valid	accepted	Valid	accepted
Sphenopidae	Zoanthidae	family	Valid	accepted	Valid	accepted
Sphenopus	Palythoa	genus	Valid	accepted	Valid	accepted
Sphyraena jello	Sphyraena putnamae	species	Valid	accepted	Valid	accepted
Sphyraena putnamae	Sphyraena jello	species	Valid	accepted	Valid	accepted
Sphyraena waitii	Sphyraena acutipinnis	species	Valid	accepted	Valid	accepted
Squaliformes	Carcharhiniformes	order	Valid	accepted	Valid	accepted
Squalus blainville	Squalus megalops	species	Valid	accepted	Valid	accepted
Squalus chloroculus	Squalus albifrons	species	Valid	accepted	Valid	accepted
Squalus megalops	Squalus blainville	species	Valid	accepted	Valid	accepted
Squalus montalbani	Squalus griffini	species	Valid	accepted	Valid	accepted
Sternaspis liui	Sternaspis chinensis	species	Valid	accepted	Valid	accepted
Stichopus monotuberculatus	Stichopus horrens	species	Valid	accepted	Valid	accepted
Stichopus monotuberculatus	Stichopus horrens	species	Valid	accepted	Valid	accepted
Stolephorus baweanensis	Stolephorus waitei	species	Valid	accepted	Valid	unaccepted
Stolephorus chinensis	Stolephorus insularis	species	Valid	accepted	Valid	accepted
Stolephorus waitei	Stolephorus baweanensis	species	Valid	unaccepted	Valid	accepted
Stomatolepas praegustator	Stomatolepas elegans	species	Valid	accepted	Valid	unaccepted
Stylissa carteri	Stylissa massa	species	Valid	accepted	Valid	accepted
Suberitida	Axinellida	order	Valid	accepted	Valid	accepted
Subeucalanus subtenuis	Subeucalanus subcrassus	species	Valid	accepted	Valid	accepted
Syngnathus californiensis	Syngnathus leptorhynchus	species	Valid	junior subjective synonym	Valid	accepted
Syngnathus californiensis	Syngnathus leptorhynchus	species	Valid	junior subjective synonym	Valid	accepted
Systellaspis debilis	Systellaspis pellucida	species	Valid	accepted	Valid	superseded combination
Taeniura lymma	Taeniura meyeni	species	Valid	unaccepted	Valid	accepted
Tatea huonensis	Tatea rufilabris	species	Valid	accepted	Valid	accepted
Tatea huonensis	Tatea rufilabris	species	Valid	accepted	Valid	accepted
Tegula xanthostigma	Tegula argyrostoma	species	Valid	accepted	Valid	accepted
Tegula xanthostigma	Tegula argyrostoma	species	Valid	accepted	Valid	accepted
Tegula xanthostigma	Tegula argyrostoma	species	Valid	accepted	Valid	accepted
Teixeirichthys	Pristotis	genus	Valid	accepted	Valid	accepted
Terapon jarbua	Terapon theraps	species	Valid	accepted	Valid	accepted
Terapon jarbua	Terapon theraps	species	Valid	accepted	Valid	accepted
Terapon jarbua	Terapon theraps	species	Valid	accepted	Valid	accepted
Tetraodontiformes	Blenniiformes	order	Valid	accepted	Valid	accepted
Tetraodontiformes	Lutjaniformes	order	Error	NA	Valid	accepted
Thalamita	Thranita	genus	Valid	junior subjective synonym	Valid	accepted
Thalassoma lutescens	Thalassoma duperrey	species	Valid	accepted	Valid	accepted
Thalassoma quinquevittatum	Thalassoma jansenii	species	Valid	accepted	Valid	accepted
Thamnaconus hypargyreus	Thamnaconus septentrionalis	species	Valid	accepted	Valid	accepted
Thamnaconus modestoides	Thamnaconus modestus	species	Valid	accepted	Valid	accepted
Thaumastocheles japonicus	Thaumastocheles dochmiodon	species	Valid	junior subjective synonym	Valid	accepted
Thenus indicus	Thenus orientalis	species	Valid	accepted	Valid	accepted
Thryssa hamiltonii	Thryssa chefuensis	species	Valid	superseded combination	Valid	accepted
Thryssa hamiltonii	Thryssa kammalensis	species	Valid	accepted	Valid	accepted
Thryssa kammalensis	Thryssa hamiltonii	species	Valid	accepted	Valid	accepted
Thunnus alalunga	Thunnus thynnus	species	Valid	accepted	Valid	accepted
Thysanopoda aequalis	Thysanopoda obtusifrons	species	Valid	accepted	Valid	accepted
Tonicia atrata	Tonicia chilensis	species	Valid	accepted	Valid	junior subjective synonym
Trachinotus mookalee	Trachinotus blochii	species	Valid	accepted	Valid	accepted
Trachurus declivis	Trachurus japonicus	species	Valid	accepted	Valid	accepted
Trachurus delagoa	Trachurus trachurus	species	Valid	accepted	Valid	accepted
Trachyrhamphus	Coelonotus	genus	Valid	unaccepted	Valid	accepted
Trapezia rufopunctata	Trapezia septata	species	Valid	accepted	Valid	accepted
Tribolodon	Pseudaspius	genus	Valid	accepted	Valid	accepted
Tribolodon	Pseudaspius	genus	Valid	accepted	Valid	accepted
Tribolodon	Pseudaspius	genus	Valid	accepted	Valid	accepted
Trichiuridae	Sciaenidae	family	Valid	accepted	Valid	accepted
Trichiurus japonicus	Trichiurus lepturus	species	Valid	accepted	Valid	accepted
Trichiurus lepturus	Trichiurus japonicus	species	Valid	accepted	Valid	accepted
Tridentiger brevispinis	Tridentiger obscurus	species	Valid	accepted	Valid	accepted
Tridentiger obscurus	Tridentiger bifasciatus	species	Valid	accepted	Valid	accepted
Trididemnum paracyclops	Trididemnum cyclops	species	Valid	accepted	Valid	accepted
Trimma milta	Trimma anthrenum	species	Valid	accepted	Valid	accepted
Trimma tevegae	Trimma corerefum	species	Valid	accepted	Valid	accepted
Trimma tevegae	Trimma hollemani	species	Valid	accepted	Valid	accepted
Tripneustes gratilla	Tripneustes depressus	species	Valid	accepted	Valid	accepted
Tripneustes gratilla	Tripneustes depressus	species	Valid	accepted	Valid	accepted
Truncatoflabellum australiensis	Truncatoflabellum candeanum	species	Valid	accepted	Valid	accepted
Tubastraea diaphana	Tubastraea stimpsonii	species	Valid	accepted	Valid	accepted
Tubastraea micranthus	Tubastraea stimpsonii	species	Valid	accepted	Valid	accepted
Turbinaria conspicua	Turbinaria stellulata	species	Valid	accepted	Valid	accepted
Turbinaria conspicua	Turbinaria stellulata	species	Valid	accepted	Valid	accepted
Turbinaria heronensis	Turbinaria reniformis	species	Valid	accepted	Valid	accepted
Turbinaria irregularis	Turbinaria mesenterina	species	Valid	accepted	Valid	accepted
Turbinaria mesenterina	Turbinaria conspicua	species	Valid	accepted	Valid	accepted
Turbinaria mesenterina	Turbinaria conspicua	species	Valid	accepted	Valid	accepted
Turbinaria mesenterina	Turbinaria patula	species	Valid	accepted	Valid	accepted
Turbinaria mesenterina	Turbinaria reniformis	species	Valid	accepted	Valid	accepted
Turbinaria mesenterina	Turbinaria reniformis	species	Valid	accepted	Valid	accepted
Turbinaria mesenterina	Turbinaria reniformis	species	Valid	accepted	Valid	accepted
Turbinaria mesenterina	Turbinaria reniformis	species	Valid	accepted	Valid	accepted
Turbinaria mesenterina	Turbinaria reniformis	species	Valid	accepted	Valid	accepted
Turbinaria mesenterina	Turbinaria reniformis	species	Valid	accepted	Valid	accepted
Turbinaria patula	Turbinaria reniformis	species	Valid	accepted	Valid	accepted
Turbinaria patula	Turbinaria reniformis	species	Valid	accepted	Valid	accepted
Turbinaria reniformis	Turbinaria mesenterina	species	Valid	accepted	Valid	accepted
Turbo chinensis	Turbo cornutus	species	Valid	accepted	Valid	unaccepted
Turris garnonsii	Turris condei	species	Valid	accepted	Valid	accepted
Turris normandavidsoni	Turris crispa	species	Valid	accepted	Valid	accepted
Unionida	Pterioida	order	Error	NA	Valid	accepted
Upeneus asymmetricus	Upeneus tragula	species	Valid	accepted	Valid	accepted
Upeneus japonicus	Upeneus tragula	species	Valid	accepted	Valid	accepted
Upeneus luzonius	Upeneus subvittatus	species	Valid	accepted	Valid	accepted
Upeneus luzonius	Upeneus tragula	species	Valid	accepted	Valid	accepted
Uranoscopiformes	Acanthuriformes	order	Valid	accepted	Error	NA
Uraspis helvola	Uraspis secunda	species	Valid	accepted	Valid	accepted
Urolophus cruciatus	Urolophus sufflavus	species	Valid	accepted	Valid	accepted
Uroteuthis	Sepioteuthis	genus	Valid	accepted	Valid	accepted
Valenciennea	Favonigobius	genus	Valid	accepted	Valid	accepted
Vittina turrita	Vittina waigiensis	species	Valid	accepted	Valid	accepted
Watersipora subatra	Watersipora subtorquata	species	Valid	accepted	Valid	accepted
Watersipora subtorquata	Watersipora subatra	species	Valid	accepted	Valid	accepted
Xestospongia muta	Xestospongia testudinaria	species	Valid	accepted	Valid	accepted
Xestospongia muta	Xestospongia testudinaria	species	Valid	accepted	Valid	accepted
Xiphasia matsubarai	Xiphasia setifer	species	Valid	accepted	Valid	accepted
Zoanthus sansibaricus	Zoanthus gigantus	species	Valid	accepted	Valid	accepted

## Sheet: BOLD_conflict
conflict2	conflict1	level	name1_valid	name1_status	name2_valid	name2_status
Abudefduf septemfasciatus	Abudefduf bengalensis	species	Valid	accepted	Valid	accepted
Abudefduf sexfasciatus	Abudefduf vaigiensis	species	Valid	accepted	Valid	accepted
Acanthastrea bowerbanki	Acanthastrea hillae	species	Valid	junior subjective synonym	Valid	superseded combination
Acanthastrea echinata	Acanthastrea hemprichii	species	Valid	accepted	Valid	accepted
Acanthastrea hemprichii	Acanthastrea echinata	species	Valid	accepted	Valid	accepted
Acanthopagrus pacificus	Acanthopagrus berda	species	Valid	accepted	Valid	accepted
Acanthopagrus sivicolus	Acanthopagrus schlegelii	species	Valid	accepted	Valid	accepted
Acanthurus blochii	Acanthurus xanthopterus	species	Valid	accepted	Valid	accepted
Acanthurus dussumieri	Acanthurus xanthopterus	species	Valid	accepted	Valid	accepted
Acanthurus leucosternon	Acanthurus nigricans	species	Valid	accepted	Valid	accepted
Acanthurus nigros	Acanthurus nigroris	species	Valid	accepted	Valid	accepted
Acartia californiensis	Acartia tonsa	species	Valid	alternative representation	Valid	alternative representation
Aclyvolva lamyi	Aclyvolva lanceolata	species	Valid	accepted	Valid	unaccepted
Acropora cerealis	Acropora tenuis	species	Valid	accepted	Valid	accepted
Acropora cervicornis	Acropora palmata	species	Valid	accepted	Valid	accepted
Acropora gemmifera	Acropora millepora	species	Valid	accepted	Valid	accepted
Acropora lutkeni	Acropora valida	species	Valid	accepted	Valid	accepted
Acropora nana	Acropora robusta	species	Valid	accepted	Valid	accepted
Acropora nasuta	Acropora divaricata	species	Valid	accepted	Valid	accepted
Aetobatus narinari	Aetobatus ocellatus	species	Valid	accepted	Valid	accepted
Agariciidae	Coscinaraeidae	family	Valid	accepted	Valid	accepted
Alatina alata	Alatina moseri	species	Valid	unaccepted	Valid	accepted
Albatrossia	Coryphaenoides	genus	Valid	accepted	Valid	accepted
Alepes djedaba	Alepes kleinii	species	Valid	accepted	Valid	accepted
Alpheus	Metalpheus	genus	Valid	accepted	Valid	accepted
Alpheus paralcyone	Alpheus brevipes	species	Valid	accepted	Valid	accepted
Alvinocaris chelys	Alvinocaris dissimilis	species	Valid	accepted	Valid	junior subjective synonym
Ambassis vachellii	Ambassis dussumieri	species	Valid	accepted	Valid	accepted
Amblypomacentrus	Amphiprion	genus	Valid	accepted	Valid	accepted
Ammodytes hexapterus	Ammodytes personatus	species	Valid	accepted	Valid	accepted
Amphibalanus amphitrite	Amphibalanus improvisus	species	Valid	accepted	Valid	accepted
Annella reticulata	Annella mollis	species	Valid	accepted	Valid	accepted
Anonyx lilljeborgi	Anonyx nugax	species	Valid	unaccepted	Valid	accepted
Antarctotetilla sagitta	Antarctotetilla leptoderma	species	Valid	accepted	Valid	accepted
Anthopleura elegantissima	Anthopleura xanthogrammica	species	Valid	accepted	Valid	accepted
Apataxia	Rissoina	genus	Valid	accepted	Valid	accepted
Aphareus	Etelis	genus	Valid	accepted	Valid	accepted
Aplysia argus	Aplysia dactylomela	species	Valid	accepted	Valid	accepted
Aplysia argus	Aplysia dactylomela	species	Valid	accepted	Valid	accepted
Apogon	Jaydia	genus	Valid	accepted	Valid	accepted
Aracana aurita	Aracana ornata	species	Valid	accepted	Valid	accepted
Argyropelecus olfersii	Argyropelecus hemigymnus	species	Valid	accepted	Valid	accepted
Arius dispar	Arius manillensis	species	Valid	accepted	Valid	accepted
Arius dispar	Arius manillensis	species	Valid	accepted	Valid	accepted
Arius manillensis	Arius dispar	species	Valid	accepted	Valid	accepted
Arothron meleagris	Arothron nigropunctatus	species	Valid	accepted	Valid	accepted
Arothron nigropunctatus	Arothron meleagris	species	Valid	accepted	Valid	accepted
Arripis truttaceus	Arripis trutta	species	Valid	accepted	Valid	unaccepted
Assiminea hiradoensis	Assiminea estuarina	species	Valid	accepted	Valid	accepted
Asterospicularia laurae	Asterospicularia randalli	species	Valid	accepted	Valid	accepted
Astraeosmilia curvata	Astraeosmilia tumida	species	Valid	accepted	Valid	accepted
Astraeosmilia tumida	Astraeosmilia connata	species	Valid	accepted	Valid	accepted
Astreopora myriophthalma	Astreopora explanata	species	Valid	accepted	Valid	accepted
Aulacomya	Mytilus	genus	Valid	accepted	Valid	accepted
Australomussa	Parascolymia	genus	Valid	junior subjective synonym	Valid	junior subjective synonym
Auxis thazard	Auxis rochei	species	Valid	accepted	Valid	accepted
Auxis thazard	Auxis rochei	species	Valid	accepted	Valid	accepted
Balanus glandula	Balanus amphitrite	species	Valid	unaccepted	Valid	accepted
Balanus improvisus	Balanus crenatus	species	Valid	accepted	Valid	unaccepted
Balanus trigonus	Balanus amphitrite	species	Valid	unaccepted	Valid	accepted
Bassanago hirsutus	Bassanago bulbiceps	species	Valid	accepted	Valid	accepted
Bathybiaster	Psilaster	genus	Valid	accepted	Valid	accepted
Bathypterois ventralis	Bathypterois atricolor	species	Valid	accepted	Valid	accepted
Bathyraja eatonii	Bathyraja murrayi	species	Valid	accepted	Valid	accepted
Bathyraja lindbergi	Bathyraja maculata	species	Valid	accepted	Valid	accepted
Bathyuroconger	Gnathophis	genus	Valid	accepted	Valid	accepted
Berryteuthis	Okutania	genus	Valid	accepted	Valid	accepted
Bohadschia tenuissima	Bohadschia marmorata	species	Valid	accepted	Valid	unaccepted
Boreogadus	Gadus	genus	Valid	accepted	Valid	accepted
Buccinum plectrum	Buccinum undatum	species	Valid	accepted	Valid	accepted
Bufonaria	Bursa	genus	Valid	accepted	Valid	accepted
Bursa	Bufonaria	genus	Valid	accepted	Valid	accepted
Calanidae	Metridinidae	family	Valid	accepted	Valid	accepted
Calanus glacialis	Calanus marshallae	species	Valid	accepted	Valid	accepted
Calcinus haigae	Calcinus hazletti	species	Valid	accepted	Valid	accepted
Calyptogena	Vesicomya	genus	Valid	accepted	Valid	accepted
Calyptogena pacifica	Calyptogena extenta	species	Valid	accepted	Valid	accepted
Calyptrophora wyvillei	Calyptrophora angularis	species	Valid	accepted	Valid	accepted
Calyptrophora wyvillei	Calyptrophora inornata	species	Valid	accepted	Valid	accepted
Candidella helminthophora	Candidella gigantea	species	Valid	accepted	Valid	accepted
Caranx bartholomaei	Caranx latus	species	Valid	accepted	Valid	accepted
Caranx bartholomaei	Caranx latus	species	Valid	accepted	Valid	accepted
Carassius auratus	Carassius gibelio	species	Valid	accepted	Valid	accepted
Carassius auratus	Carassius gibelio	species	Valid	accepted	Valid	accepted
Carassius carassius	Carassius auratus	species	Valid	accepted	Valid	accepted
Carassius gibelio	Carassius auratus	species	Valid	accepted	Valid	accepted
Carassius gibelio	Carassius auratus	species	Valid	accepted	Valid	accepted
Carcharhinus	Rhizoprionodon	genus	Valid	accepted	Valid	accepted
Carcharhinus altimus	Carcharhinus plumbeus	species	Valid	accepted	Valid	accepted
Carcharhinus brevipinna	Carcharhinus limbatus	species	Valid	accepted	Valid	accepted
Carcharhinus brevipinna	Carcharhinus limbatus	species	Valid	accepted	Valid	accepted
Carcharhinus dussumieri	Carcharhinus coatesi	species	Valid	accepted	Valid	accepted
Carcharhinus galapagensis	Carcharhinus obscurus	species	Valid	accepted	Valid	accepted
Carcharhinus limbatus	Carcharhinus brevipinna	species	Valid	accepted	Valid	accepted
Carcharhinus limbatus	Carcharhinus amblyrhynchos	species	Valid	accepted	Valid	accepted
Carcharhinus sealei	Carcharhinus dussumieri	species	Valid	accepted	Valid	accepted
Carcharhinus sealei	Carcharhinus sorrah	species	Valid	accepted	Valid	accepted
Carcharhinus sorrah	Carcharhinus brevipinna	species	Valid	accepted	Valid	accepted
Carinomitra	Mitra	genus	Valid	accepted	Valid	accepted
Centrophorus zeehaani	Centrophorus granulosus	species	Valid	accepted	Valid	accepted
Centroscymnus	Centroselachus	genus	Valid	accepted	Valid	accepted
Cephalopholis nigripinnis	Cephalopholis urodeta	species	Valid	accepted	Valid	accepted
Cephalopholis nigripinnis	Cephalopholis urodeta	species	Valid	accepted	Valid	accepted
Cephalopholis nigripinnis	Cephalopholis urodeta	species	Valid	accepted	Valid	accepted
Cephalopholis nigripinnis	Cephalopholis urodeta	species	Valid	accepted	Valid	accepted
Cephalopholis nigripinnis	Cephalopholis urodeta	species	Valid	accepted	Valid	accepted
Cephalopholis urodeta	Cephalopholis nigripinnis	species	Valid	accepted	Valid	accepted
Cephalopholis urodeta	Cephalopholis nigripinnis	species	Valid	accepted	Valid	accepted
Ceratias holboelli	Ceratias tentaculatus	species	Valid	accepted	Valid	accepted
Cerithidea alata	Cerithidea cingulata	species	Valid	unaccepted	Valid	superseded combination
Cerithidea djadjariensis	Cerithidea cingulata	species	Valid	unaccepted	Error	NA
Chaceon granulatus	Chaceon imperialis	species	Valid	accepted	Valid	accepted
Chaceon imperialis	Chaceon granulatus	species	Valid	accepted	Valid	accepted
Chaceon imperialis	Chaceon granulatus	species	Valid	accepted	Valid	accepted
Chaetodon mertensii	Chaetodon xanthurus	species	Valid	accepted	Valid	accepted
Chaetodon pelewensis	Chaetodon punctatofasciatus	species	Valid	accepted	Valid	accepted
Chaetodon xanthurus	Chaetodon mertensii	species	Valid	accepted	Valid	accepted
Chaetodontidae	Pempheridae	family	Valid	accepted	Valid	accepted
Chaetopterus pacificus	Chaetopterus cautus	species	Valid	accepted	Valid	accepted
Charybdis sagamiensis	Charybdis rufodactylus	species	Valid	superseded combination	Valid	superseded combination
Chelonibia patula	Chelonibia testudinaria	species	Valid	accepted	Valid	unaccepted
Chelonibia testudinaria	Chelonibia patula	species	Valid	unaccepted	Valid	accepted
Chelonibia testudinaria	Chelonibia patula	species	Valid	unaccepted	Valid	accepted
Chelonibia testudinaria	Chelonibia patula	species	Valid	unaccepted	Valid	accepted
Chelonibia testudinaria	Chelonibia patula	species	Valid	unaccepted	Valid	accepted
Chelonibia testudinaria	Chelonibia patula	species	Valid	unaccepted	Valid	accepted
Chelonibia testudinaria	Chelonibia patula	species	Valid	unaccepted	Valid	accepted
Chelonibia testudinaria	Chelonibia patula	species	Valid	unaccepted	Valid	accepted
Chelonibia testudinaria	Chelonibia patula	species	Valid	unaccepted	Valid	accepted
Chirolophis nugator	Chirolophis decoratus	species	Valid	accepted	Valid	accepted
Chiroteuthis calyx	Chiroteuthis veranii	species	Valid	accepted	Valid	accepted
Chlorodiella	Leptodius	genus	Valid	accepted	Valid	accepted
Chlorodiella	Medaeops	genus	Valid	accepted	Valid	accepted
Chromis circumaurea	Chromis abyssus	species	Valid	accepted	Valid	accepted
Chromis circumaurea	Chromis abyssus	species	Valid	accepted	Valid	accepted
Cinachyra barbata	Cinachyra antarctica	species	Valid	accepted	Valid	accepted
Citharichthys sordidus	Citharichthys stigmaeus	species	Valid	accepted	Valid	accepted
Citharichthys stigmaeus	Citharichthys sordidus	species	Valid	accepted	Valid	accepted
Cladiella krempfi	Cladiella pachyclados	species	Valid	accepted	Valid	accepted
Cladiella pachyclados	Cladiella krempfi	species	Valid	accepted	Valid	accepted
Clavus exasperatus	Clavus rugizonatus	species	Valid	accepted	Valid	accepted
Cliona viridis	Cliona celata	species	Valid	accepted	Valid	accepted
Coelorinchus acanthiger	Coelorinchus trachycarus	species	Valid	accepted	Valid	accepted
Coelorinchus kermadecus	Coelorinchus mycterismus	species	Valid	accepted	Valid	accepted
Conasprella	Conus	genus	Valid	accepted	Valid	accepted
Conasprella	Conus	genus	Valid	accepted	Valid	accepted
Congiopodus coriaceus	Congiopodus leucopaecilus	species	Valid	accepted	Valid	accepted
Conus	Conasprella	genus	Valid	accepted	Valid	accepted
Conus	Conasprella	genus	Valid	accepted	Valid	accepted
Conus	Conasprella	genus	Valid	accepted	Valid	accepted
Conus	Conasprella	genus	Valid	accepted	Valid	accepted
Conus	Conasprella	genus	Valid	accepted	Valid	accepted
Conus	Profundiconus	genus	Valid	accepted	Valid	accepted
Conus lividus	Conus rattus	species	Valid	accepted	Valid	accepted
Conus marmoreus	Conus bandanus	species	Valid	accepted	Valid	unaccepted
Coradion chrysozonus	Coradion altivelis	species	Valid	accepted	Valid	accepted
Corallium imperiale	Corallium laauense	species	Valid	unaccepted	Valid	unaccepted
Corallium imperiale	Corallium laauense	species	Valid	unaccepted	Valid	unaccepted
Corallium laauense	Corallium imperiale	species	Valid	unaccepted	Valid	unaccepted
Coryphaena equiselis	Coryphaena hippurus	species	Valid	accepted	Valid	accepted
Coryphaenoides rudis	Coryphaenoides murrayi	species	Valid	accepted	Valid	accepted
Coscinaraeidae	Psammocoridae	family	Valid	accepted	Valid	accepted
Cribrarula cribraria	Cribrarula rottnestensis	species	Valid	accepted	Valid	accepted
Cristiceps aurantiacus	Cristiceps argyropleura	species	Valid	accepted	Valid	accepted
Ctenochaetus marginatus	Ctenochaetus truncatus	species	Valid	accepted	Valid	accepted
Cubiceps caeruleus	Cubiceps whiteleggii	species	Valid	accepted	Valid	accepted
Cyclodius nitidus	Cyclodius obscurus	species	Valid	accepted	Valid	accepted
Cycloseris sinensis	Cycloseris costulata	species	Valid	accepted	Valid	accepted
Cycloseris vaughani	Cycloseris costulata	species	Valid	accepted	Valid	accepted
Cymatium	Gutturnium	genus	Valid	accepted	Valid	accepted
Cymatium	Monoplex	genus	Valid	accepted	Valid	accepted
Cyphastrea chalcidicum	Cyphastrea serailia	species	Valid	accepted	Valid	accepted
Cypraea	Monetaria	genus	Valid	accepted	Valid	accepted
Cypraea	Luria	genus	Valid	accepted	Valid	accepted
Cypraea	Monetaria	genus	Valid	accepted	Valid	accepted
Cypraea	Talostolida	genus	Valid	accepted	Valid	accepted
Cypraea	Luria	genus	Valid	accepted	Valid	accepted
Cypraea	Luria	genus	Valid	accepted	Valid	accepted
Cypraea	Lyncina	genus	Valid	accepted	Valid	accepted
Cypraea	Mauritia	genus	Valid	unaccepted	Valid	accepted
Cypraea	Monetaria	genus	Valid	accepted	Valid	accepted
Cypraea	Monetaria	genus	Valid	accepted	Valid	accepted
Cypraea	Talostolida	genus	Valid	accepted	Valid	accepted
Cypraea	Monetaria	genus	Valid	accepted	Valid	accepted
Cypselurus naresii	Cypselurus oligolepis	species	Valid	accepted	Valid	accepted
Dactyloptena macracantha	Dactyloptena orientalis	species	Valid	accepted	Valid	accepted
Dactyloptena orientalis	Dactyloptena papilio	species	Valid	accepted	Valid	accepted
Dardanus	Calcinus	genus	Valid	accepted	Valid	accepted
Dardanus sanguinocarpus	Dardanus lagopodes	species	Valid	accepted	Valid	accepted
Decapterus russelli	Decapterus maruadsi	species	Valid	accepted	Valid	accepted
Delphinus delphis	Delphinus capensis	species	Valid	nomen dubium	Valid	accepted
Dendronephthya castanea	Dendronephthya gigantea	species	Valid	accepted	Valid	accepted
Dendronephthya suensoni	Dendronephthya gigantea	species	Valid	accepted	Valid	accepted
Dentiraja confusa	Dentiraja cerva	species	Valid	accepted	Valid	accepted
Diagramma pictum	Diagramma melanacrum	species	Valid	accepted	Valid	accepted
Diaphus brachycephalus	Diaphus meadi	species	Valid	accepted	Valid	accepted
Diaphus hudsoni	Diaphus mollis	species	Valid	accepted	Valid	accepted
Dichotella	Junceella	genus	Valid	accepted	Valid	accepted
Diminovula whitworthi	Diminovula aurantiomacula	species	Valid	accepted	Valid	accepted
Diplasterias	Notasterias	genus	Valid	accepted	Valid	accepted
Drupa albolabris	Drupa ricinus	species	Valid	superseded combination	Valid	superseded combination
Drupa ricinus	Drupa albolabris	species	Valid	superseded combination	Valid	superseded combination
Echinophyllia	Oxypora	genus	Valid	accepted	Valid	accepted
Echinophyllia	Oxypora	genus	Valid	accepted	Valid	accepted
Echinophyllia	Oxypora	genus	Valid	accepted	Valid	accepted
Echinophyllia echinoporoides	Echinophyllia aspera	species	Valid	accepted	Valid	accepted
Echinopora	Leptoria	genus	Valid	accepted	Valid	accepted
Echinopora gemmacea	Echinopora pacificus	species	Valid	incorrect grammatical agreement of specific epithet	Valid	accepted
Echinothrix calamaris	Echinothrix diadema	species	Valid	accepted	Valid	accepted
Echinothrix diadema	Echinothrix calamaris	species	Valid	accepted	Valid	accepted
Eleutheronema rhadinum	Eleutheronema tetradactylum	species	Valid	accepted	Valid	accepted
Eleutheronema tetradactylum	Eleutheronema rhadinum	species	Valid	accepted	Valid	accepted
Elysia atroviridis	Elysia ornata	species	Valid	accepted	Valid	accepted
Encrasicholina	Stolephorus	genus	Valid	accepted	Valid	accepted
Engyprosopon xystrias	Engyprosopon macrolepis	species	Valid	accepted	Valid	accepted
Enteroctopus megalocyathus	Enteroctopus zealandicus	species	Valid	accepted	Valid	accepted
Entomacrodus	Nannosalarias	genus	Valid	accepted	Valid	accepted
Epiactaea	Novactaea	genus	Valid	accepted	Valid	accepted
Epigonidae	Howellidae	family	Valid	accepted	Valid	accepted
Epinephelus coioides	Epinephelus tauvina	species	Valid	accepted	Valid	accepted
Equulites lineolatus	Equulites leuciscus	species	Valid	accepted	Valid	accepted
Eriocheir japonica	Eriocheir sinensis	species	Valid	accepted	Valid	accepted
Etmopterus lucifer	Etmopterus pusillus	species	Valid	accepted	Valid	accepted
Etmopterus pusillus	Etmopterus brachyurus	species	Valid	accepted	Valid	accepted
Etrumeus sadina	Etrumeus micropus	species	Valid	accepted	Valid	accepted
Eudyptes schlegeli	Eudyptes chrysolophus	species	Valid	accepted	Valid	accepted
Eumicrotremus	Cyclopteropsis	genus	Valid	accepted	Valid	accepted
Eumicrotremus	Cyclopteropsis	genus	Valid	accepted	Valid	accepted
Eumunida annulosa	Eumunida sternomaculata	species	Valid	accepted	Valid	accepted
Euphyllia ancora	Euphyllia divisa	species	Valid	superseded combination	Valid	superseded combination
Exaiptasia	Aiptasia	genus	Valid	accepted	Valid	accepted
Favia helianthoides	Favia pallida	species	Valid	superseded combination	Valid	superseded combination
Favia matthaii	Favia rotumana	species	Valid	superseded combination	Valid	superseded combination
Faviidae	Merulinidae	family	Valid	junior objective synonym	Valid	junior objective synonym
Faviidae	Lobophylliidae	family	Valid	junior objective synonym	Valid	junior objective synonym
Faviidae	Merulinidae	family	Valid	junior objective synonym	Valid	junior objective synonym
Faviidae	Merulinidae	family	Valid	junior objective synonym	Valid	junior objective synonym
Favites	Platygyra	genus	Valid	accepted	Valid	accepted
Favites complanata	Favites pentagona	species	Valid	accepted	Valid	accepted
Fenneropenaeus	Penaeus	genus	Valid	accepted	Valid	junior subjective synonym
Fenneropenaeus	Penaeus	genus	Valid	accepted	Valid	junior subjective synonym
Flabellinidae	Samlidae	family	Valid	accepted	Valid	accepted
Flabellinidae	Samlidae	family	Valid	accepted	Valid	accepted
Flagellostomias	Leptostomias	genus	Valid	accepted	Valid	accepted
Fusitriton magellanicus	Fusitriton oregonensis	species	Valid	accepted	Valid	accepted
Gadus macrocephalus	Gadus morhua	species	Valid	accepted	Valid	accepted
Galathea consobrina	Galathea aegyptiaca	species	Valid	accepted	Valid	accepted
Gasterosteus aculeatus	Gasterosteus gymnurus	species	Valid	unaccepted	Valid	accepted
Gasterosteus aculeatus	Gasterosteus gymnurus	species	Valid	unaccepted	Valid	accepted
Genypterus blacodes	Genypterus tigerinus	species	Valid	accepted	Valid	accepted
Glabraster	Porania	genus	Valid	accepted	Valid	accepted
Gnatholepis thompsoni	Gnatholepis cauerensis	species	Valid	accepted	Valid	accepted
Gomphina	Macridiscus	genus	Valid	accepted	Valid	accepted
Gomphina	Macridiscus	genus	Valid	accepted	Valid	accepted
Goniastrea	Merulina	genus	Valid	accepted	Valid	accepted
Goniopora norfolkensis	Goniopora somaliensis	species	Valid	accepted	Valid	accepted
Goniopora pendulus	Goniopora stokesi	species	Valid	accepted	Valid	accepted
Goniopora stokesi	Goniopora pendulus	species	Valid	accepted	Valid	accepted
Goniopora tenuidens	Goniopora burgosi	species	Valid	accepted	Valid	accepted
Gonostoma	Sigmops	genus	Valid	accepted	Valid	accepted
Gutturnium	Cymatium	genus	Valid	accepted	Valid	accepted
Gutturnium	Cymatium	genus	Valid	accepted	Valid	accepted
Gymnocranius elongatus	Gymnocranius audleyi	species	Valid	accepted	Valid	accepted
Gymnodoris impudica	Gymnodoris rubropapulosa	species	Valid	unaccepted	Valid	accepted
Gymnothorax rueppelliae	Gymnothorax rueppellii	species	Valid	unaccepted	Valid	accepted
Halecium halecinum	Halecium beanii	species	Valid	accepted	Valid	accepted
Halgerda okinawa	Halgerda malesso	species	Valid	accepted	Valid	accepted
Halipteris californica	Halipteris willemoesi	species	Valid	unaccepted	Valid	unaccepted
Haminoea	Haloa	genus	Valid	accepted	Valid	accepted
Hastulopsis conspersa	Hastulopsis amoena	species	Valid	unaccepted	Valid	unaccepted
Helice latimera	Helice tientsinensis	species	Valid	accepted	Valid	accepted
Helice latimera	Helice tientsinensis	species	Valid	accepted	Valid	accepted
Helice tientsinensis	Helice latimera	species	Valid	accepted	Valid	accepted
Helice tientsinensis	Helice latimera	species	Valid	accepted	Valid	accepted
Helicolenus barathri	Helicolenus percoides	species	Valid	accepted	Valid	accepted
Hemiarius	Sciades	genus	Valid	accepted	Valid	accepted
Hemicorallium imperiale	Hemicorallium laauense	species	Valid	accepted	Valid	accepted
Hemicorallium imperiale	Hemicorallium laauense	species	Valid	accepted	Valid	accepted
Hemicorallium regale	Hemicorallium laauense	species	Valid	accepted	Valid	accepted
Heterocentrotus mammillatus	Heterocentrotus mamillatus	species	Valid	accepted	Valid	unaccepted
Hexagrammidae	Cottidae	family	Valid	accepted	Valid	accepted
Hiatavolva coarctata	Hiatavolva rugosa	species	Valid	unaccepted	Valid	unaccepted
Hiatavolva coarctata	Hiatavolva rugosa	species	Valid	unaccepted	Valid	unaccepted
Hiatavolva coarctata	Hiatavolva rugosa	species	Valid	unaccepted	Valid	unaccepted
Hiatavolva coarctata	Hiatavolva rugosa	species	Valid	unaccepted	Valid	unaccepted
Himantolophus appelii	Himantolophus stewarti	species	Valid	accepted	Valid	accepted
Himantolophus groenlandicus	Himantolophus appelii	species	Valid	accepted	Valid	accepted
Himantura	Brevitrygon	genus	Valid	accepted	Valid	accepted
Himantura	Maculabatis	genus	Valid	accepted	Valid	accepted
Himantura	Maculabatis	genus	Valid	accepted	Valid	accepted
Himantura	Maculabatis	genus	Valid	accepted	Valid	accepted
Himantura	Maculabatis	genus	Valid	accepted	Valid	accepted
Himantura undulata	Himantura astra	species	Valid	unaccepted	Valid	accepted
Hippocampus angustus	Hippocampus subelongatus	species	Valid	accepted	Valid	accepted
Hipponix	Sabia	genus	Valid	accepted	Valid	accepted
Hirundichthys rondeletii	Hirundichthys rufipinnis	species	Valid	accepted	Valid	accepted
Holothuria arenicola	Holothuria pardalis	species	Valid	alternative representation	Valid	alternative representation
Holothuria inhabilis	Holothuria pardalis	species	Valid	alternative representation	Valid	alternative representation
Homalocantha pele	Homalocantha anatomica	species	Valid	accepted	Valid	accepted
Homophyllia	Acanthastrea	genus	Valid	accepted	Valid	accepted
Hydnophora grandis	Hydnophora exesa	species	Valid	accepted	Valid	accepted
Hydrolagus	Chimaera	genus	Valid	accepted	Valid	accepted
Hymeniacidon perlevis	Hymeniacidon sinapium	species	Valid	unaccepted	Valid	accepted
Hyperiella antarctica	Hyperiella dilatata	species	Valid	accepted	Valid	accepted
Hypophthalmichthys nobilis	Hypophthalmichthys molitrix	species	Valid	accepted	Valid	accepted
Hyporhamphus australis	Hyporhamphus melanochir	species	Valid	accepted	Valid	accepted
Hyporhamphus melanochir	Hyporhamphus australis	species	Valid	accepted	Valid	accepted
Hyporhamphus regularis	Hyporhamphus melanochir	species	Valid	accepted	Valid	accepted
Iotyrris	Lophiotoma	genus	Valid	accepted	Valid	junior subjective synonym
Ircinia dendroides	Ircinia variabilis	species	Valid	accepted	Valid	accepted
Ischnochitonidae	Chitonidae	family	Valid	accepted	Valid	accepted
Isognomon perna	Isognomon legumen	species	Valid	accepted	Valid	accepted
Isotealia	Glyphoperidium	genus	Valid	accepted	Valid	accepted
Jassa marmorata	Jassa falcata	species	Valid	accepted	Valid	accepted
Jaydia truncata	Jaydia smithi	species	Valid	accepted	Valid	accepted
Kestratherina esox	Kestratherina brevirostris	species	Valid	accepted	Valid	accepted
Klyxum	Cladiella	genus	Valid	accepted	Valid	accepted
Kondakovia	Moroteuthopsis	genus	Valid	accepted	Valid	unaccepted
Kyphosidae	Serranidae	family	Valid	accepted	Valid	accepted
Lagocephalus cheesemanii	Lagocephalus gloveri	species	Valid	accepted	Valid	accepted
Lampanyctus	Nannobrachium	genus	Valid	accepted	Valid	accepted
Lampanyctus intricarius	Lampanyctus macdonaldi	species	Valid	accepted	Valid	accepted
Larus hyperboreus	Larus glaucescens	species	Valid	accepted	Valid	accepted
Leiognathus	Nuchequula	genus	Valid	accepted	Valid	accepted
Leiognathus	Nuchequula	genus	Valid	accepted	Valid	accepted
Lendenfeldia	Strepsichordaia	genus	Valid	accepted	Valid	accepted
Lepidion schmidti	Lepidion inosimae	species	Valid	accepted	Valid	accepted
Lepidonotothen squamifrons	Lepidonotothen kempi	species	Valid	unaccepted	Valid	accepted
Leptastrea transversa	Leptastrea bottae	species	Valid	accepted	Valid	accepted
Lethrinus nebulosus	Lethrinus laticaudis	species	Valid	accepted	Valid	accepted
Lethrinus olivaceus	Lethrinus microdon	species	Valid	accepted	Valid	accepted
Limacina retroversa	Limacina helicina	species	Valid	accepted	Valid	accepted
Limnoperna	Xenostrobus	genus	Valid	accepted	Valid	accepted
Limnoperna	Xenostrobus	genus	Valid	accepted	Valid	accepted
Limnoperna	Xenostrobus	genus	Valid	accepted	Valid	accepted
Limnoperna	Xenostrobus	genus	Valid	accepted	Valid	accepted
Limnoperna	Xenostrobus	genus	Valid	accepted	Valid	accepted
Linophryne	Haplophryne	genus	Valid	accepted	Valid	accepted
Lithophyllon	Danafungia	genus	Valid	accepted	Valid	accepted
Littoraria scabra	Littoraria intermedia	species	Valid	accepted	Valid	accepted
Lobophytum	Sarcophyton	genus	Valid	accepted	Valid	accepted
Lobophytum legitimum	Lobophytum crassum	species	Valid	accepted	Valid	accepted
Lobophytum verum	Lobophytum catalai	species	Valid	accepted	Valid	accepted
Loboprimnoa	Primnoa	genus	Valid	accepted	Valid	accepted
Lophelia	Desmophyllum	genus	Valid	accepted	Valid	junior subjective synonym
Lottia persona	Lottia pelta	species	Valid	accepted	Valid	accepted
Luidia orientalis	Luidia hardwicki	species	Valid	accepted	Valid	accepted
Luidia quinaria	Luidia changi	species	Valid	accepted	Valid	accepted
Lunatia	Notocochlis	genus	Valid	accepted	Valid	junior subjective synonym
Luria	Cypraea	genus	Valid	accepted	Valid	accepted
Lutjanus erythropterus	Lutjanus malabaricus	species	Valid	accepted	Valid	accepted
Lutjanus madras	Lutjanus xanthopinnis	species	Valid	accepted	Valid	accepted
Macoma	Limecola	genus	Valid	unaccepted	Valid	accepted
Macridiscus	Gomphina	genus	Valid	accepted	Valid	accepted
Macridiscus	Gomphina	genus	Valid	accepted	Valid	accepted
Macridiscus	Gomphina	genus	Valid	accepted	Valid	accepted
Macropodus opercularis	Macropodus chinensis	species	Valid	unaccepted	Valid	accepted
Macrouridae	Moridae	family	Valid	accepted	Valid	accepted
Maculabatis	Himantura	genus	Valid	accepted	Valid	accepted
Malacocottus zonurus	Malacocottus kincaidi	species	Valid	accepted	Valid	accepted
Malacocottus zonurus	Malacocottus kincaidi	species	Valid	accepted	Valid	accepted
Mallotus villosus	Mallotus catervarius	species	Valid	unaccepted	Valid	accepted
Maurolicus australis	Maurolicus japonicus	species	Valid	accepted	Valid	accepted
Mayaheros	Vieja	genus	Valid	accepted	Valid	accepted
Melamphaes polylepis	Melamphaes simus	species	Valid	accepted	Valid	accepted
Melamphaes simus	Melamphaes longivelis	species	Valid	accepted	Valid	accepted
Melicertus latisulcatus	Melicertus plebejus	species	Valid	superseded combination	Valid	superseded combination
Melichthys	Odonus	genus	Valid	accepted	Valid	accepted
Menaethius	Simocarcinus	genus	Valid	accepted	Valid	accepted
Menaethius	Simocarcinus	genus	Valid	accepted	Valid	accepted
Menaethius	Simocarcinus	genus	Valid	accepted	Valid	accepted
Menaethius orientalis	Menaethius monoceros	species	Valid	accepted	Valid	accepted
Meretrix meretrix	Meretrix petechialis	species	Valid	accepted	Valid	accepted
Meretrix petechialis	Meretrix meretrix	species	Valid	accepted	Valid	accepted
Merulinidae	Poritidae	family	Valid	accepted	Valid	junior objective synonym
Merulinidae	Lobophylliidae	family	Valid	junior objective synonym	Valid	junior objective synonym
Merulinidae	Montastraeidae	family	Valid	accepted	Valid	junior objective synonym
Metapenaeus monoceros	Metapenaeus ensis	species	Valid	accepted	Valid	accepted
Metapenaeus monoceros	Metapenaeus ensis	species	Valid	accepted	Valid	accepted
Metridia lucens	Metridia pacifica	species	Valid	accepted	Valid	alternative representation
Metridia lucens	Metridia pacifica	species	Valid	accepted	Valid	alternative representation
Metridia lucens	Metridia pacifica	species	Valid	accepted	Valid	alternative representation
Metridia pacifica	Metridia lucens	species	Valid	alternative representation	Valid	accepted
Metridia pacifica	Metridia lucens	species	Valid	alternative representation	Valid	accepted
Microporellidae	Smittinidae	family	Valid	accepted	Valid	accepted
Mitra	Strigatella	genus	Valid	accepted	Valid	accepted
Mobula	Manta	genus	Valid	unaccepted	Valid	accepted
Mobula japanica	Mobula mobular	species	Valid	accepted	Valid	junior subjective synonym
Monomia	Portunus	genus	Valid	accepted	Valid	accepted
Monotaxis heterodon	Monotaxis grandoculis	species	Valid	accepted	Valid	accepted
Montastraeidae	Faviidae	family	Valid	junior objective synonym	Valid	accepted
Montastraeidae	Faviidae	family	Valid	junior objective synonym	Valid	accepted
Montipora	Anacropora	genus	Valid	accepted	Valid	accepted
Montipora digitata	Montipora efflorescens	species	Valid	accepted	Valid	accepted
Montipora informis	Montipora grisea	species	Valid	accepted	Valid	accepted
Montipora patula	Montipora verrilli	species	Valid	accepted	Valid	accepted
Muggiaea	Chelophyes	genus	Valid	accepted	Valid	accepted
Mugil curema	Mugil cephalus	species	Valid	accepted	Valid	accepted
Munida idyia	Munida striola	species	Valid	superseded combination	Valid	superseded combination
Munida leagora	Munida caesura	species	Valid	superseded combination	Valid	superseded combination
Munida melite	Munida nesaea	species	Valid	superseded combination	Valid	superseded combination
Munida simulatrix	Munida runcinata	species	Valid	superseded combination	Valid	superseded combination
Muraenichthys	Ophichthus	genus	Valid	accepted	Valid	accepted
Muricidae	Columbellidae	family	Valid	accepted	Valid	accepted
Musculus discors	Musculus niger	species	Valid	accepted	Valid	accepted
Mustelus stevensi	Mustelus lenticulatus	species	Valid	accepted	Valid	accepted
Myripristis murdjan	Myripristis seychellensis	species	Valid	accepted	Valid	accepted
Myripristis murdjan	Myripristis hexagona	species	Valid	accepted	Valid	accepted
Mytilus	Aulacomya	genus	Valid	accepted	Valid	accepted
Mytilus galloprovincialis	Mytilus edulis	species	Valid	accepted	Valid	accepted
Mytilus galloprovincialis	Mytilus edulis	species	Valid	accepted	Valid	accepted
Mytilus galloprovincialis	Mytilus edulis	species	Valid	accepted	Valid	accepted
Mytilus galloprovincialis	Mytilus edulis	species	Valid	accepted	Valid	accepted
Mytilus galloprovincialis	Mytilus edulis	species	Valid	accepted	Valid	accepted
Nacella chiloensis	Nacella venosa	species	Valid	unaccepted	Valid	unaccepted
Nacella chiloensis	Nacella venosa	species	Valid	unaccepted	Valid	unaccepted
Nacella chiloensis	Nacella venosa	species	Valid	unaccepted	Valid	unaccepted
Nacella chiloensis	Nacella venosa	species	Valid	unaccepted	Valid	unaccepted
Nacella deaurata	Nacella magellanica	species	Valid	accepted	Valid	accepted
Nacella deaurata	Nacella fuegiensis	species	Valid	unaccepted	Valid	accepted
Nacella deaurata	Nacella fuegiensis	species	Valid	unaccepted	Valid	accepted
Nacella deaurata	Nacella magellanica	species	Valid	accepted	Valid	accepted
Nacella deaurata	Nacella fuegiensis	species	Valid	unaccepted	Valid	accepted
Nacella deaurata	Nacella fuegiensis	species	Valid	unaccepted	Valid	accepted
Nacella delicatissima	Nacella deaurata	species	Valid	accepted	Valid	unaccepted
Nacella magellanica	Nacella delicatissima	species	Valid	unaccepted	Valid	accepted
Nacella magellanica	Nacella venosa	species	Valid	unaccepted	Valid	accepted
Nacella magellanica	Nacella venosa	species	Valid	unaccepted	Valid	accepted
Nacella magellanica	Nacella deaurata	species	Valid	accepted	Valid	accepted
Nacella venosa	Nacella chiloensis	species	Valid	unaccepted	Valid	unaccepted
Nacella venosa	Nacella chiloensis	species	Valid	unaccepted	Valid	unaccepted
Nannobrachium	Lampanyctus	genus	Valid	accepted	Valid	accepted
Nannobrachium	Lampanyctus	genus	Valid	accepted	Valid	accepted
Nannosalarias	Entomacrodus	genus	Valid	accepted	Valid	accepted
Naso caesius	Naso hexacanthus	species	Valid	accepted	Valid	accepted
Naso caesius	Naso hexacanthus	species	Valid	accepted	Valid	accepted
Naso caesius	Naso hexacanthus	species	Valid	accepted	Valid	accepted
Naso hexacanthus	Naso caesius	species	Valid	accepted	Valid	accepted
Naso hexacanthus	Naso caesius	species	Valid	accepted	Valid	accepted
Naso mcdadei	Naso reticulatus	species	Valid	accepted	Valid	accepted
Nassarius	Tritia	genus	Valid	accepted	Valid	accepted
Nemertesia ramosa	Nemertesia antennina	species	Valid	accepted	Valid	accepted
Neoachiropsetta	Achiropsetta	genus	Valid	accepted	Valid	accepted
Neoniphon	Myripristis	genus	Valid	accepted	Valid	accepted
Neophocaena phocaenoides	Neophocaena asiaeorientalis	species	Valid	accepted	Valid	accepted
Notasterias	Diplasterias	genus	Valid	accepted	Valid	accepted
Notasterias armata	Notasterias bongraini	species	Valid	accepted	Valid	accepted
Notoacmea helmsi	Notoacmea virescens	species	Valid	unaccepted	Valid	unaccepted
Notocochlis	Natica	genus	Valid	accepted	Valid	accepted
Nucella lima	Nucella emarginata	species	Valid	accepted	Valid	accepted
Nucella lima	Nucella emarginata	species	Valid	accepted	Valid	accepted
Nucella lima	Nucella emarginata	species	Valid	accepted	Valid	accepted
Obelia dichotoma	Obelia longissima	species	Valid	accepted	Valid	accepted
Obelia dichotoma	Obelia longissima	species	Valid	accepted	Valid	accepted
Oithona similis	Oithona atlantica	species	Valid	accepted	Valid	accepted
Ommastrephes	Todarodes	genus	Valid	accepted	Valid	accepted
Ommastrephes	Todarodes	genus	Valid	accepted	Valid	accepted
Ophiocamax brevicetra	Ophiocamax applicatus	species	Valid	accepted	Valid	accepted
Ophiopholis aculeata	Ophiopholis kennerlyi	species	Valid	accepted	Valid	accepted
Ophiopyrgidae	Ophiuridae	family	Valid	accepted	Valid	accepted
Ophiothela mirabilis	Ophiothela danae	species	Valid	unaccepted	Valid	accepted
Oreochromis mossambicus	Oreochromis niloticus	species	Valid	accepted	Valid	accepted
Oreochromis mossambicus	Oreochromis niloticus	species	Valid	accepted	Valid	accepted
Oreochromis mossambicus	Oreochromis niloticus	species	Valid	accepted	Valid	accepted
Oreochromis mossambicus	Oreochromis niloticus	species	Valid	accepted	Valid	accepted
Oreochromis mossambicus	Oreochromis niloticus	species	Valid	accepted	Valid	accepted
Oreochromis niloticus	Oreochromis mossambicus	species	Valid	accepted	Valid	accepted
Oreochromis niloticus	Oreochromis aureus	species	Valid	accepted	Valid	accepted
Oreochromis niloticus	Oreochromis mossambicus	species	Valid	accepted	Valid	accepted
Ostichthys sheni	Ostichthys japonicus	species	Valid	accepted	Valid	accepted
Oulophyllia bennettae	Oulophyllia crispa	species	Valid	accepted	Valid	accepted
Oxymeris	Terebra	genus	Valid	accepted	Valid	accepted
Oxypora	Echinophyllia	genus	Valid	accepted	Valid	accepted
Oxypora	Echinophyllia	genus	Valid	accepted	Valid	accepted
Oxypora	Echinophyllia	genus	Valid	accepted	Valid	accepted
Oxypora echinata	Oxypora lacera	species	Valid	accepted	Valid	accepted
Oxyporhamphus micropterus	Oxyporhamphus similis	species	Valid	accepted	Valid	accepted
Palythoa caesia	Palythoa tuberculosa	species	Valid	accepted	Valid	accepted
Palythoa heliodiscus	Palythoa tuberculosa	species	Valid	accepted	Valid	accepted
Pampus argenteus	Pampus echinogaster	species	Valid	unaccepted	Valid	accepted
Pampus argenteus	Pampus echinogaster	species	Valid	unaccepted	Valid	accepted
Paphia	Marcia	genus	Valid	accepted	Valid	accepted
Paracalanus indicus	Paracalanus parvus	species	Valid	alternative representation	Valid	accepted
Paracalanus indicus	Paracalanus parvus	species	Valid	alternative representation	Valid	accepted
Paracalanus indicus	Paracalanus parvus	species	Valid	alternative representation	Valid	accepted
Paracalanus indicus	Paracalanus parvus	species	Valid	alternative representation	Valid	accepted
Paracalanus indicus	Paracalanus parvus	species	Valid	alternative representation	Valid	accepted
Paracalanus indicus	Paracalanus parvus	species	Valid	alternative representation	Valid	accepted
Paracalanus indicus	Paracalanus parvus	species	Valid	alternative representation	Valid	accepted
Paracalanus parvus	Paracalanus indicus	species	Valid	accepted	Valid	alternative representation
Paracalanus parvus	Paracalanus indicus	species	Valid	accepted	Valid	alternative representation
Paracalanus parvus	Paracalanus indicus	species	Valid	accepted	Valid	alternative representation
Paracalanus parvus	Paracalanus indicus	species	Valid	accepted	Valid	alternative representation
Paracalanus parvus	Paracalanus indicus	species	Valid	accepted	Valid	alternative representation
Paracorallium japonicum	Paracorallium tortuosum	species	Valid	unaccepted	Valid	superseded combination
Paraeuchaeta elongata	Paraeuchaeta norvegica	species	Valid	accepted	Valid	accepted
Paragorgia arborea	Paragorgia pacifica	species	Valid	superseded combination	Valid	accepted
Paragrapsus gaimardii	Paragrapsus laevis	species	Valid	accepted	Valid	accepted
Paraplagusia guttata	Paraplagusia japonica	species	Valid	accepted	Valid	accepted
Parascolymia	Australomussa	genus	Valid	junior subjective synonym	Valid	junior subjective synonym
Parastenella pacifica	Parastenella ramosa	species	Valid	accepted	Valid	accepted
Parexocoetus mento	Parexocoetus brachypterus	species	Valid	accepted	Valid	accepted
Parupeneus macronemus	Parupeneus multifasciatus	species	Valid	accepted	Valid	accepted
Pastinachus ater	Pastinachus sephen	species	Valid	accepted	Valid	accepted
Pavona gigantea	Pavona cactus	species	Valid	accepted	Valid	accepted
Pectinia	Mycedium	genus	Valid	unavailable name	Valid	unavailable name
Pectinia	Mycedium	genus	Valid	unavailable name	Valid	unavailable name
Pectinia	Mycedium	genus	Valid	unavailable name	Valid	unavailable name
Pempheris vanicolensis	Pempheris flavicycla	species	Valid	unaccepted	Valid	accepted
Penaeus	Farfantepenaeus	genus	Valid	junior subjective synonym	Valid	accepted
Penaeus	Fenneropenaeus	genus	Valid	junior subjective synonym	Valid	accepted
Penaeus	Fenneropenaeus	genus	Valid	junior subjective synonym	Valid	accepted
Penaeus	Farfantepenaeus	genus	Valid	junior subjective synonym	Valid	accepted
Penaeus	Marsupenaeus	genus	Valid	junior subjective synonym	Valid	accepted
Penaeus merguiensis	Penaeus indicus	species	Valid	accepted	Valid	accepted
Penaeus semisulcatus	Penaeus monodon	species	Valid	accepted	Valid	accepted
Phascolosoma esculenta	Phascolosoma arcuatum	species	Valid	alternative representation	Valid	unaccepted
Phestilla sibogae	Phestilla lugubris	species	Valid	superseded combination	Valid	superseded combination
Phormosoma bursarium	Phormosoma rigidum	species	Valid	accepted	Valid	accepted
Phoxinus lumaireul	Phoxinus phoxinus	species	Valid	accepted	Valid	unaccepted
Phyllidiella pustulosa	Phyllidiella zeylanica	species	Valid	accepted	Valid	accepted
Phyllidiidae	Chromodorididae	family	Valid	accepted	Valid	accepted
Phymastrea valenciennesi	Phymastrea magnistellata	species	Valid	junior subjective synonym	Valid	superseded combination
Physogyra	Plerogyra	genus	Valid	accepted	Valid	accepted
Physogyra	Plerogyra	genus	Valid	accepted	Valid	accepted
Pinctada radiata	Pinctada maculata	species	Valid	accepted	Valid	accepted
Pione vastifica	Pione lampa	species	Valid	accepted	Valid	accepted
Planiliza	Paramugil	genus	Valid	accepted	Valid	accepted
Platygyra acuta	Platygyra ryukyuensis	species	Valid	accepted	Valid	accepted
Platygyra crosslandi	Platygyra sinensis	species	Valid	accepted	Valid	accepted
Platygyra lamellina	Platygyra daedalea	species	Valid	accepted	Valid	accepted
Platygyra pini	Platygyra sinensis	species	Valid	accepted	Valid	accepted
Platygyra pini	Platygyra verweyi	species	Valid	accepted	Valid	accepted
Plectropomus leopardus	Plectropomus areolatus	species	Valid	accepted	Valid	accepted
Plectropomus maculatus	Plectropomus leopardus	species	Valid	accepted	Valid	accepted
Plectropomus maculatus	Plectropomus leopardus	species	Valid	accepted	Valid	accepted
Plerogyra	Physogyra	genus	Valid	accepted	Valid	accepted
Plerogyra	Physogyra	genus	Valid	accepted	Valid	accepted
Plumarella aleutiana	Plumarella superba	species	Valid	accepted	Valid	accepted
Plumarella superba	Plumarella aleutiana	species	Valid	accepted	Valid	accepted
Pocillopora damicornis	Pocillopora elegans	species	Valid	accepted	Valid	accepted
Pocillopora damicornis	Pocillopora elegans	species	Valid	accepted	Valid	accepted
Pocillopora damicornis	Pocillopora elegans	species	Valid	accepted	Valid	accepted
Pocillopora elegans	Pocillopora damicornis	species	Valid	accepted	Valid	accepted
Pocillopora elegans	Pocillopora damicornis	species	Valid	accepted	Valid	accepted
Pocillopora verrucosa	Pocillopora damicornis	species	Valid	accepted	Valid	accepted
Poecilia	Xiphophorus	genus	Valid	accepted	Valid	accepted
Polymetme corythaeola	Polymetme thaeocoryla	species	Valid	accepted	Valid	accepted
Polymixia busakhini	Polymixia nobilis	species	Valid	accepted	Valid	accepted
Porites annae	Porites lichen	species	Valid	accepted	Valid	accepted
Porites cylindrica	Porites compressa	species	Valid	accepted	Valid	accepted
Porites lichen	Porites rus	species	Valid	accepted	Valid	accepted
Porites lobata	Porites compressa	species	Valid	accepted	Valid	accepted
Porites lobata	Porites compressa	species	Valid	accepted	Valid	accepted
Porites lutea	Porites compressa	species	Valid	accepted	Valid	accepted
Porites lutea	Porites evermanni	species	Valid	accepted	Valid	accepted
Porites lutea	Porites rus	species	Valid	accepted	Valid	accepted
Porites lutea	Porites rus	species	Valid	accepted	Valid	accepted
Portunus	Monomia	genus	Valid	accepted	Valid	accepted
Pristigenys niphonia	Pristigenys refulgens	species	Valid	accepted	Valid	accepted
Pristotis	Teixeirichthys	genus	Valid	accepted	Valid	accepted
Profundiconus teramachii	Profundiconus smirna	species	Valid	accepted	Valid	accepted
Pronucula	Ennucula	genus	Valid	accepted	Valid	accepted
Psammocora albopicta	Psammocora digitata	species	Valid	accepted	Valid	accepted
Psammocora contigua	Psammocora nierstraszi	species	Valid	accepted	Valid	accepted
Psammocora nierstraszi	Psammocora contigua	species	Valid	accepted	Valid	accepted
Psammocoridae	Coscinaraeidae	family	Valid	accepted	Valid	accepted
Pseudanthias bicolor	Pseudanthias bartlettorum	species	Valid	accepted	Valid	superseded combination
Pseudocalanus mimus	Pseudocalanus minutus	species	Valid	accepted	Valid	accepted
Pseudocalanus minutus	Pseudocalanus mimus	species	Valid	accepted	Valid	accepted
Pseudorhombus neglectus	Pseudorhombus arsius	species	Valid	accepted	Valid	accepted
Pseudoziidae	Xanthidae	family	Valid	accepted	Valid	accepted
Psilaster	Proserpinaster	genus	Valid	accepted	Valid	accepted
Pteraeolidia ianthina	Pteraeolidia semperi	species	Valid	accepted	Valid	accepted
Pterois antennata	Pterois volitans	species	Valid	accepted	Valid	accepted
Rapana venosa	Rapana bezoar	species	Valid	accepted	Valid	accepted
Rhizopsammia	Cladopsammia	genus	Valid	accepted	Valid	accepted
Rhizopsammia	Cladopsammia	genus	Valid	accepted	Valid	accepted
Ringiculoides kurilensis	Ringiculoides vityazi	species	Valid	accepted	Valid	accepted
Ruditapes variegata	Ruditapes variegatus	species	Valid	unaccepted	Valid	unaccepted
Ruditapes variegata	Ruditapes variegatus	species	Valid	unaccepted	Valid	unaccepted
Ruditapes variegata	Ruditapes variegatus	species	Valid	unaccepted	Valid	unaccepted
Ruditapes variegatus	Ruditapes variegata	species	Valid	unaccepted	Valid	unaccepted
Rutilus	Scardinius	genus	Valid	accepted	Valid	accepted
Saccostrea cuccullata	Saccostrea cucullata	species	Valid	unaccepted	Valid	accepted
Saccostrea cucullata	Saccostrea cuccullata	species	Valid	accepted	Valid	unaccepted
Saccostrea echinata	Saccostrea kegaki	species	Valid	accepted	Valid	accepted
Saccostrea glomerata	Saccostrea kegaki	species	Valid	accepted	Valid	accepted
Sagartiidae	Actinostolidae	family	Valid	accepted	Valid	accepted
Salvelinus alpinus	Salvelinus malma	species	Valid	accepted	Valid	accepted
Sarcophyton cinereum	Sarcophyton glaucum	species	Valid	accepted	Valid	accepted
Sarcophyton crassum	Sarcophyton glaucum	species	Valid	accepted	Valid	accepted
Sarcophyton glaucum	Sarcophyton cinereum	species	Valid	accepted	Valid	accepted
Sarcophyton glaucum	Sarcophyton cinereum	species	Valid	accepted	Valid	accepted
Sarcophyton nanwanensis	Sarcophyton cinereum	species	Valid	accepted	Valid	accepted
Sarda	Auxis	genus	Valid	accepted	Valid	accepted
Sarda	Auxis	genus	Valid	accepted	Valid	accepted
Sarda	Auxis	genus	Valid	accepted	Valid	accepted
Sardinella jussieu	Sardinella gibbosa	species	Valid	accepted	Valid	unaccepted
Sardinella jussieu	Sardinella gibbosa	species	Valid	accepted	Valid	unaccepted
Sarotherodon	Oreochromis	genus	Valid	accepted	Valid	accepted
Saurida grandisquamis	Saurida undosquamis	species	Valid	accepted	Valid	unaccepted
Saurida macrolepis	Saurida lessepsianus	species	Valid	accepted	Valid	accepted
Schizoporella errata	Schizoporella pungens	species	Valid	accepted	Valid	accepted
Sciades	Hemiarius	genus	Valid	accepted	Valid	accepted
Sciades	Hemiarius	genus	Valid	accepted	Valid	accepted
Sclerasterias	Rumbleaster	genus	Valid	unaccepted	Valid	accepted
Scomber japonicus	Scomber colias	species	Valid	accepted	Valid	accepted
Scomberoides lysan	Scomberoides tol	species	Valid	accepted	Valid	accepted
Scopeloberyx robustus	Scopeloberyx opisthopterus	species	Valid	accepted	Valid	accepted
Scorpaena cookii	Scorpaena cardinalis	species	Valid	accepted	Valid	unaccepted
Scorpaenodes kelloggi	Scorpaenodes guamensis	species	Valid	accepted	Valid	accepted
Scylla serrata	Scylla tranquebarica	species	Valid	accepted	Valid	accepted
Scymnodon	Centroscymnus	genus	Valid	accepted	Valid	accepted
Secutor	Leiognathus	genus	Valid	accepted	Valid	accepted
Secutor insidiator	Secutor indicius	species	Valid	unaccepted	Valid	unaccepted
Sepioteuthis	Uroteuthis	genus	Valid	accepted	Valid	accepted
Seriolella punctata	Seriolella porosa	species	Valid	accepted	Valid	accepted
Serpulorbis	Thylacodes	genus	Valid	accepted	Valid	junior objective synonym
Serradonta	Bathyacmaea	genus	Valid	accepted	Valid	unaccepted
Serradonta	Bathyacmaea	genus	Valid	accepted	Valid	unaccepted
Sicyonia japonica	Sicyonia parajaponica	species	Valid	accepted	Valid	accepted
Sicyopterus macrostetholepis	Sicyopterus lagocephalus	species	Valid	accepted	Valid	accepted
Siganus lineatus	Siganus guttatus	species	Valid	accepted	Valid	accepted
Siganus unimaculatus	Siganus vulpinus	species	Valid	accepted	Valid	accepted
Sillago asiatica	Sillago sihama	species	Valid	accepted	Valid	accepted
Sillago chondropus	Sillago sihama	species	Valid	accepted	Valid	unaccepted
Sillago maculata	Sillago burrus	species	Valid	accepted	Valid	accepted
Sillago maculata	Sillago aeolus	species	Valid	accepted	Valid	accepted
Sillago sihama	Sillago indica	species	Valid	accepted	Valid	accepted
Sinularia abrupta	Sinularia lochmodes	species	Valid	superseded combination	Valid	superseded combination
Sinularia abrupta	Sinularia lochmodes	species	Valid	superseded combination	Valid	superseded combination
Sinularia abrupta	Sinularia densa	species	Valid	superseded combination	Valid	superseded combination
Sinularia gaweli	Sinularia peculiaris	species	Valid	superseded combination	Valid	superseded combination
Sinularia maxima	Sinularia corpulentissima	species	Valid	superseded combination	Valid	superseded combination
Sinularia tumulosa	Sinularia ornata	species	Valid	superseded combination	Valid	superseded combination
Sinularia woodyensis	Sinularia linnei	species	Valid	superseded combination	Valid	superseded combination
Sphenopidae	Zoanthidae	family	Valid	accepted	Valid	accepted
Sphenopus	Palythoa	genus	Valid	accepted	Valid	accepted
Sphyraena jello	Sphyraena putnamae	species	Valid	accepted	Valid	accepted
Sphyraena jello	Sphyraena putnamae	species	Valid	accepted	Valid	accepted
Sphyraena waitii	Sphyraena acutipinnis	species	Valid	accepted	Valid	accepted
Squalus megalops	Squalus blainville	species	Valid	accepted	Valid	accepted
Stenobrachius leucopsarus	Stenobrachius nannochir	species	Valid	accepted	Valid	accepted
Sternaspis chinensis	Sternaspis liui	species	Valid	accepted	Valid	accepted
Stichopus monotuberculatus	Stichopus horrens	species	Valid	accepted	Valid	accepted
Stichopus monotuberculatus	Stichopus horrens	species	Valid	accepted	Valid	accepted
Stomatolepas elegans	Stomatolepas praegustator	species	Valid	unaccepted	Valid	accepted
Strigatella	Mitra	genus	Valid	accepted	Valid	accepted
Strongylocentrotus droebachiensis	Strongylocentrotus pallidus	species	Valid	accepted	Valid	accepted
Suberitida	Axinellida	order	Valid	accepted	Valid	accepted
Subeucalanus subcrassus	Subeucalanus subtenuis	species	Valid	accepted	Valid	accepted
Symphurus orientalis	Symphurus novemfasciatus	species	Valid	accepted	Valid	accepted
Symphurus orientalis	Symphurus novemfasciatus	species	Valid	accepted	Valid	accepted
Symphurus orientalis	Symphurus novemfasciatus	species	Valid	accepted	Valid	accepted
Symphyllia agaricia	Symphyllia valenciennesii	species	Valid	superseded combination	Valid	superseded combination
Symphyllia radians	Symphyllia recta	species	Valid	junior subjective synonym	Valid	junior objective synonym
Symphyllia radians	Symphyllia recta	species	Valid	junior subjective synonym	Valid	junior objective synonym
Synalpheus hastilicrassus	Synalpheus bituberculatus	species	Valid	accepted	Valid	accepted
Synalpheus streptodactylus	Synalpheus hastilicrassus	species	Valid	accepted	Valid	accepted
Synanceia horrida	Synanceia verrucosa	species	Valid	accepted	Valid	accepted
Syngnathus californiensis	Syngnathus leptorhynchus	species	Valid	junior subjective synonym	Valid	accepted
Synodus variegatus	Synodus dermatogenys	species	Valid	accepted	Valid	accepted
Taeniura lymma	Taeniura meyeni	species	Valid	unaccepted	Valid	accepted
Tatea rufilabris	Tatea huonensis	species	Valid	accepted	Valid	accepted
Tatea rufilabris	Tatea huonensis	species	Valid	accepted	Valid	accepted
Tayuva	Jorunna	genus	Valid	accepted	Valid	accepted
Terapon	Pelates	genus	Valid	accepted	Valid	accepted
Terapon jarbua	Terapon theraps	species	Valid	accepted	Valid	accepted
Terapontidae	Monodactylidae	family	Valid	accepted	Valid	accepted
Terebellides horikoshii	Terebellides stroemii	species	Valid	accepted	Valid	accepted
Thalamita	Charybdis	genus	Valid	accepted	Valid	accepted
Thalassoma duperrey	Thalassoma lutescens	species	Valid	accepted	Valid	accepted
Thalassoma nigrofasciatum	Thalassoma jansenii	species	Valid	accepted	Valid	accepted
Thamnaconus modestus	Thamnaconus modestoides	species	Valid	accepted	Valid	accepted
Thamnaconus septentrionalis	Thamnaconus hypargyreus	species	Valid	accepted	Valid	accepted
Thaumastocheles japonicus	Thaumastocheles dochmiodon	species	Valid	junior subjective synonym	Valid	accepted
Thenus orientalis	Thenus indicus	species	Valid	accepted	Valid	accepted
Thranita	Thalamita	genus	Valid	accepted	Valid	junior subjective synonym
Thunnus obesus	Thunnus albacares	species	Valid	accepted	Valid	accepted
Tiarannidae	Laodiceidae	family	Valid	accepted	Valid	accepted
Trachinotus blochii	Trachinotus mookalee	species	Valid	accepted	Valid	accepted
Trachurus declivis	Trachurus japonicus	species	Valid	accepted	Valid	accepted
Trachurus symmetricus	Trachurus murphyi	species	Valid	accepted	Valid	accepted
Trachurus trachurus	Trachurus mediterraneus	species	Valid	accepted	Valid	accepted
Trapezia septata	Trapezia rufopunctata	species	Valid	accepted	Valid	accepted
Tribolodon brandtii	Tribolodon hakonensis	species	Valid	junior objective synonym	Valid	unaccepted
Trichiurus lepturus	Trichiurus japonicus	species	Valid	accepted	Valid	accepted
Tridentiger obscurus	Tridentiger bifasciatus	species	Valid	accepted	Valid	accepted
Trivia	Trivirostra	genus	Valid	accepted	Valid	accepted
Trivia	Trivirostra	genus	Valid	accepted	Valid	accepted
Truncatoflabellum australiensis	Truncatoflabellum candeanum	species	Valid	accepted	Valid	accepted
Tubastraea coccinea	Tubastraea micranthus	species	Valid	accepted	Valid	taxon inquirendum
Turbinaria mesenterina	Turbinaria reniformis	species	Valid	accepted	Valid	accepted
Turbinaria mesenterina	Turbinaria reniformis	species	Valid	accepted	Valid	accepted
Turbinaria mesenterina	Turbinaria reniformis	species	Valid	accepted	Valid	accepted
Turbinaria mesenterina	Turbinaria reniformis	species	Valid	accepted	Valid	accepted
Turbinaria reniformis	Turbinaria heronensis	species	Valid	accepted	Valid	accepted
Turbinaria reniformis	Turbinaria mesenterina	species	Valid	accepted	Valid	accepted
Turbinaria reniformis	Turbinaria mesenterina	species	Valid	accepted	Valid	accepted
Turbinaria reniformis	Turbinaria patula	species	Valid	accepted	Valid	accepted
Turris condei	Turris garnonsii	species	Valid	accepted	Valid	accepted
Turris crispa	Turris normandavidsoni	species	Valid	accepted	Valid	accepted
Uca	Austruca	genus	Valid	accepted	Valid	accepted
Uca	Austruca	genus	Valid	accepted	Valid	accepted
Upeneus asymmetricus	Upeneus tragula	species	Valid	accepted	Valid	accepted
Upeneus japonicus	Upeneus tragula	species	Valid	accepted	Valid	accepted
Upeneus luzonius	Upeneus subvittatus	species	Valid	accepted	Valid	accepted
Uraspis helvola	Uraspis secunda	species	Valid	accepted	Valid	accepted
Urolophus cruciatus	Urolophus sufflavus	species	Valid	accepted	Valid	accepted
Vieja melanura	Vieja melanurus	species	Valid	accepted	Valid	misspelling - incorrect subsequent spelling
Vokesimurex	Siratus	genus	Valid	accepted	Valid	accepted
Watersipora arcuata	Watersipora subtorquata	species	Valid	accepted	Valid	accepted
Watersipora arcuata	Watersipora subtorquata	species	Valid	accepted	Valid	accepted
Xenostrobus	Limnoperna	genus	Valid	accepted	Valid	accepted
Xenostrobus	Limnoperna	genus	Valid	accepted	Valid	accepted
Xenostrobus	Limnoperna	genus	Valid	accepted	Valid	accepted
Xenostrobus	Limnoperna	genus	Valid	accepted	Valid	accepted
Xestospongia testudinaria	Xestospongia muta	species	Valid	accepted	Valid	accepted
Zenarchopteridae	Belonidae	family	Valid	accepted	Valid	accepted
Zeuxo	Hexapleomera	genus	Valid	accepted	Valid	accepted
Zoanthus gigantus	Zoanthus sansibaricus	species	Valid	accepted	Valid	accepted
Zoanthus vietnamensis	Zoanthus gigantus	species	Valid	accepted	Valid	accepted
Zoarcidae	Liparidae	family	Valid	accepted	Valid	accepted

## Sheet: NCBI_barcodingGap_problem
Seq2	Seq1	Distance	taxid1	phylum1	species1	taxid2	phylum2	species2	Type
AB261166	AB076928	0.271	182731	Mollusca	Pinctada maculata	182731	Mollusca	Pinctada maculata	Intra-species
AB289580	AB117275	1.196	242767	Cnidaria	Oulophyllia crispa	242767	Cnidaria	Oulophyllia crispa	Intra-species
AB289580	AB117276	1.188	242767	Cnidaria	Oulophyllia crispa	242767	Cnidaria	Oulophyllia crispa	Intra-species
AY894316	AY839581	0.246	222003	Annelida	Lepidonotus squamatus	222003	Annelida	Lepidonotus squamatus	Intra-species
DQ417457	AF441088	0.205	193294	Bryozoa	Watersipora subtorquata	193294	Bryozoa	Watersipora subtorquata	Intra-species
DQ986518	DQ974656	1.074	413987	Mollusca	Bulla ampulla	413987	Mollusca	Bulla ampulla	Intra-species
DQ986519	DQ974656	1.137	413987	Mollusca	Bulla ampulla	413987	Mollusca	Bulla ampulla	Intra-species
DQ986520	DQ974656	1.107	413987	Mollusca	Bulla ampulla	413987	Mollusca	Bulla ampulla	Intra-species
DQ986521	DQ974656	1.077	413987	Mollusca	Bulla ampulla	413987	Mollusca	Bulla ampulla	Intra-species
DQ986522	DQ974656	1.036	413987	Mollusca	Bulla ampulla	413987	Mollusca	Bulla ampulla	Intra-species
DQ986523	DQ986518	1.116	413987	Mollusca	Bulla ampulla	413987	Mollusca	Bulla ampulla	Intra-species
DQ986523	DQ986519	1.171	413987	Mollusca	Bulla ampulla	413987	Mollusca	Bulla ampulla	Intra-species
DQ986523	DQ986521	1.102	413987	Mollusca	Bulla ampulla	413987	Mollusca	Bulla ampulla	Intra-species
DQ986523	DQ986522	1.119	413987	Mollusca	Bulla ampulla	413987	Mollusca	Bulla ampulla	Intra-species
DQ986523	DQ986520	1.146	413987	Mollusca	Bulla ampulla	413987	Mollusca	Bulla ampulla	Intra-species
DQ986524	DQ974656	1.09	413987	Mollusca	Bulla ampulla	413987	Mollusca	Bulla ampulla	Intra-species
DQ986524	DQ986523	1.115	413987	Mollusca	Bulla ampulla	413987	Mollusca	Bulla ampulla	Intra-species
DQ986525	DQ974656	1.093	413987	Mollusca	Bulla ampulla	413987	Mollusca	Bulla ampulla	Intra-species
DQ986525	DQ986523	1.123	413987	Mollusca	Bulla ampulla	413987	Mollusca	Bulla ampulla	Intra-species
DQ986526	DQ986520	1.109	413987	Mollusca	Bulla ampulla	413987	Mollusca	Bulla ampulla	Intra-species
DQ986526	DQ986525	1.082	413987	Mollusca	Bulla ampulla	413987	Mollusca	Bulla ampulla	Intra-species
DQ986526	DQ986524	1.089	413987	Mollusca	Bulla ampulla	413987	Mollusca	Bulla ampulla	Intra-species
DQ986526	DQ986518	1.075	413987	Mollusca	Bulla ampulla	413987	Mollusca	Bulla ampulla	Intra-species
DQ986526	DQ986521	1.073	413987	Mollusca	Bulla ampulla	413987	Mollusca	Bulla ampulla	Intra-species
DQ986526	DQ986522	1.036	413987	Mollusca	Bulla ampulla	413987	Mollusca	Bulla ampulla	Intra-species
DQ986526	DQ986519	1.137	413987	Mollusca	Bulla ampulla	413987	Mollusca	Bulla ampulla	Intra-species
DQ986527	DQ986519	1.137	413987	Mollusca	Bulla ampulla	413987	Mollusca	Bulla ampulla	Intra-species
DQ986527	DQ986518	1.075	413987	Mollusca	Bulla ampulla	413987	Mollusca	Bulla ampulla	Intra-species
DQ986527	DQ986524	1.091	413987	Mollusca	Bulla ampulla	413987	Mollusca	Bulla ampulla	Intra-species
DQ986527	DQ986525	1.093	413987	Mollusca	Bulla ampulla	413987	Mollusca	Bulla ampulla	Intra-species
DQ986527	DQ986522	1.036	413987	Mollusca	Bulla ampulla	413987	Mollusca	Bulla ampulla	Intra-species
DQ986527	DQ986521	1.077	413987	Mollusca	Bulla ampulla	413987	Mollusca	Bulla ampulla	Intra-species
DQ986527	DQ986520	1.108	413987	Mollusca	Bulla ampulla	413987	Mollusca	Bulla ampulla	Intra-species
DQ986528	DQ986525	1.088	413987	Mollusca	Bulla ampulla	413987	Mollusca	Bulla ampulla	Intra-species
DQ986528	DQ986522	1.036	413987	Mollusca	Bulla ampulla	413987	Mollusca	Bulla ampulla	Intra-species
DQ986528	DQ986518	1.089	413987	Mollusca	Bulla ampulla	413987	Mollusca	Bulla ampulla	Intra-species
DQ986528	DQ986524	1.106	413987	Mollusca	Bulla ampulla	413987	Mollusca	Bulla ampulla	Intra-species
DQ986528	DQ986520	1.125	413987	Mollusca	Bulla ampulla	413987	Mollusca	Bulla ampulla	Intra-species
DQ986528	DQ986521	1.077	413987	Mollusca	Bulla ampulla	413987	Mollusca	Bulla ampulla	Intra-species
DQ986528	DQ986519	1.147	413987	Mollusca	Bulla ampulla	413987	Mollusca	Bulla ampulla	Intra-species
DQ986529	DQ986525	1.169	413987	Mollusca	Bulla ampulla	413987	Mollusca	Bulla ampulla	Intra-species
DQ986529	DQ986520	1.159	413987	Mollusca	Bulla ampulla	413987	Mollusca	Bulla ampulla	Intra-species
DQ986529	DQ986522	1.111	413987	Mollusca	Bulla ampulla	413987	Mollusca	Bulla ampulla	Intra-species
DQ986529	DQ986524	1.131	413987	Mollusca	Bulla ampulla	413987	Mollusca	Bulla ampulla	Intra-species
DQ986529	DQ986519	1.195	413987	Mollusca	Bulla ampulla	413987	Mollusca	Bulla ampulla	Intra-species
DQ986529	DQ986518	1.132	413987	Mollusca	Bulla ampulla	413987	Mollusca	Bulla ampulla	Intra-species
DQ986529	DQ986521	1.144	413987	Mollusca	Bulla ampulla	413987	Mollusca	Bulla ampulla	Intra-species
DQ986530	DQ986524	1.139	413987	Mollusca	Bulla ampulla	413987	Mollusca	Bulla ampulla	Intra-species
DQ986530	DQ986522	1.121	413987	Mollusca	Bulla ampulla	413987	Mollusca	Bulla ampulla	Intra-species
DQ986530	DQ986520	1.168	413987	Mollusca	Bulla ampulla	413987	Mollusca	Bulla ampulla	Intra-species
DQ986530	DQ986521	1.153	413987	Mollusca	Bulla ampulla	413987	Mollusca	Bulla ampulla	Intra-species
DQ986530	DQ986519	1.205	413987	Mollusca	Bulla ampulla	413987	Mollusca	Bulla ampulla	Intra-species
DQ986530	DQ986525	1.178	413987	Mollusca	Bulla ampulla	413987	Mollusca	Bulla ampulla	Intra-species
DQ986530	DQ986518	1.14	413987	Mollusca	Bulla ampulla	413987	Mollusca	Bulla ampulla	Intra-species
DQ986531	DQ986525	1.169	413987	Mollusca	Bulla ampulla	413987	Mollusca	Bulla ampulla	Intra-species
DQ986531	DQ986521	1.144	413987	Mollusca	Bulla ampulla	413987	Mollusca	Bulla ampulla	Intra-species
DQ986531	DQ986518	1.132	413987	Mollusca	Bulla ampulla	413987	Mollusca	Bulla ampulla	Intra-species
DQ986531	DQ986520	1.159	413987	Mollusca	Bulla ampulla	413987	Mollusca	Bulla ampulla	Intra-species
DQ986531	DQ986524	1.131	413987	Mollusca	Bulla ampulla	413987	Mollusca	Bulla ampulla	Intra-species
DQ986531	DQ986522	1.121	413987	Mollusca	Bulla ampulla	413987	Mollusca	Bulla ampulla	Intra-species
DQ986531	DQ986519	1.195	413987	Mollusca	Bulla ampulla	413987	Mollusca	Bulla ampulla	Intra-species
EU371721	AB289580	1.184	242767	Cnidaria	Oulophyllia crispa	242767	Cnidaria	Oulophyllia crispa	Intra-species
EU514511	EF607335	1.046	197572	Chordata	Atule mate	197572	Chordata	Atule mate	Intra-species
EU514511	EF609293	1.034	197572	Chordata	Atule mate	197572	Chordata	Atule mate	Intra-species
EU514512	EF607335	1.036	197572	Chordata	Atule mate	197572	Chordata	Atule mate	Intra-species
EU514512	EF609293	1.026	197572	Chordata	Atule mate	197572	Chordata	Atule mate	Intra-species
EU595058	EU514512	1.036	197572	Chordata	Atule mate	197572	Chordata	Atule mate	Intra-species
EU595058	EU514511	1.046	197572	Chordata	Atule mate	197572	Chordata	Atule mate	Intra-species
EU595059	EU514512	1.026	197572	Chordata	Atule mate	197572	Chordata	Atule mate	Intra-species
EU595059	EU514511	1.034	197572	Chordata	Atule mate	197572	Chordata	Atule mate	Intra-species
EU595060	EU514512	1.026	197572	Chordata	Atule mate	197572	Chordata	Atule mate	Intra-species
EU595060	EU514511	1.034	197572	Chordata	Atule mate	197572	Chordata	Atule mate	Intra-species
EU595061	EU514512	1.026	197572	Chordata	Atule mate	197572	Chordata	Atule mate	Intra-species
EU595061	EU514511	1.034	197572	Chordata	Atule mate	197572	Chordata	Atule mate	Intra-species
EU595062	EU514512	1.026	197572	Chordata	Atule mate	197572	Chordata	Atule mate	Intra-species
EU595062	EU514511	1.034	197572	Chordata	Atule mate	197572	Chordata	Atule mate	Intra-species
EU595063	EU514512	1.026	197572	Chordata	Atule mate	197572	Chordata	Atule mate	Intra-species
EU595063	EU514511	1.034	197572	Chordata	Atule mate	197572	Chordata	Atule mate	Intra-species
EU595064	EU514511	1.034	197572	Chordata	Atule mate	197572	Chordata	Atule mate	Intra-species
EU595064	EU514512	1.026	197572	Chordata	Atule mate	197572	Chordata	Atule mate	Intra-species
EU595065	EU514511	1.034	197572	Chordata	Atule mate	197572	Chordata	Atule mate	Intra-species
EU595065	EU514512	1.026	197572	Chordata	Atule mate	197572	Chordata	Atule mate	Intra-species
EU595066	EU514511	1.034	197572	Chordata	Atule mate	197572	Chordata	Atule mate	Intra-species
EU595066	EU514512	1.026	197572	Chordata	Atule mate	197572	Chordata	Atule mate	Intra-species
EU595067	EU514511	1.034	197572	Chordata	Atule mate	197572	Chordata	Atule mate	Intra-species
EU595067	EU514512	1.026	197572	Chordata	Atule mate	197572	Chordata	Atule mate	Intra-species
FJ237567	EF609436	0.252	106585	Chordata	Pristipomoides multidens	106585	Chordata	Pristipomoides multidens	Intra-species
FJ237568	EF609436	0.252	106585	Chordata	Pristipomoides multidens	106585	Chordata	Pristipomoides multidens	Intra-species
FJ237569	EF609436	0.249	106585	Chordata	Pristipomoides multidens	106585	Chordata	Pristipomoides multidens	Intra-species
FJ237603	EF609436	0.26	106585	Chordata	Pristipomoides multidens	106585	Chordata	Pristipomoides multidens	Intra-species
FJ237967	EU514512	1.026	197572	Chordata	Atule mate	197572	Chordata	Atule mate	Intra-species
FJ237967	EU514511	1.034	197572	Chordata	Atule mate	197572	Chordata	Atule mate	Intra-species
FJ237968	EU514512	1.026	197572	Chordata	Atule mate	197572	Chordata	Atule mate	Intra-species
FJ237968	EU514511	1.034	197572	Chordata	Atule mate	197572	Chordata	Atule mate	Intra-species
FJ237969	EU514511	1.034	197572	Chordata	Atule mate	197572	Chordata	Atule mate	Intra-species
FJ237969	EU514512	1.026	197572	Chordata	Atule mate	197572	Chordata	Atule mate	Intra-species
FJ345439	AB289580	1.199	242767	Cnidaria	Oulophyllia crispa	242767	Cnidaria	Oulophyllia crispa	Intra-species
GU672443	AY894316	0.248	222003	Annelida	Lepidonotus squamatus	222003	Annelida	Lepidonotus squamatus	Intra-species
GU672466	AY894316	0.248	222003	Annelida	Lepidonotus squamatus	222003	Annelida	Lepidonotus squamatus	Intra-species
GU672467	AY894316	0.25	222003	Annelida	Lepidonotus squamatus	222003	Annelida	Lepidonotus squamatus	Intra-species
GU672468	AY894316	0.248	222003	Annelida	Lepidonotus squamatus	222003	Annelida	Lepidonotus squamatus	Intra-species
GU672473	AY894316	0.248	222003	Annelida	Lepidonotus squamatus	222003	Annelida	Lepidonotus squamatus	Intra-species
GU672484	AY894316	0.248	222003	Annelida	Lepidonotus squamatus	222003	Annelida	Lepidonotus squamatus	Intra-species
GU672485	AY894316	0.248	222003	Annelida	Lepidonotus squamatus	222003	Annelida	Lepidonotus squamatus	Intra-species
GU672487	AY894316	0.248	222003	Annelida	Lepidonotus squamatus	222003	Annelida	Lepidonotus squamatus	Intra-species
GU672488	AY894316	0.248	222003	Annelida	Lepidonotus squamatus	222003	Annelida	Lepidonotus squamatus	Intra-species
GU672490	AY894316	0.248	222003	Annelida	Lepidonotus squamatus	222003	Annelida	Lepidonotus squamatus	Intra-species
GU672491	AY894316	0.248	222003	Annelida	Lepidonotus squamatus	222003	Annelida	Lepidonotus squamatus	Intra-species
GU672492	AY894316	0.248	222003	Annelida	Lepidonotus squamatus	222003	Annelida	Lepidonotus squamatus	Intra-species
GU672493	AY894316	0.248	222003	Annelida	Lepidonotus squamatus	222003	Annelida	Lepidonotus squamatus	Intra-species
GU672498	AY894316	0.248	222003	Annelida	Lepidonotus squamatus	222003	Annelida	Lepidonotus squamatus	Intra-species
GU672503	AY894316	0.248	222003	Annelida	Lepidonotus squamatus	222003	Annelida	Lepidonotus squamatus	Intra-species
GU672504	AY894316	0.248	222003	Annelida	Lepidonotus squamatus	222003	Annelida	Lepidonotus squamatus	Intra-species
GU672506	AY894316	0.248	222003	Annelida	Lepidonotus squamatus	222003	Annelida	Lepidonotus squamatus	Intra-species
GU672507	AY894316	0.248	222003	Annelida	Lepidonotus squamatus	222003	Annelida	Lepidonotus squamatus	Intra-species
GU672508	AY894316	0.248	222003	Annelida	Lepidonotus squamatus	222003	Annelida	Lepidonotus squamatus	Intra-species
GU672509	AY894316	0.248	222003	Annelida	Lepidonotus squamatus	222003	Annelida	Lepidonotus squamatus	Intra-species
GU672513	AY894316	0.248	222003	Annelida	Lepidonotus squamatus	222003	Annelida	Lepidonotus squamatus	Intra-species
GU672515	AY894316	0.248	222003	Annelida	Lepidonotus squamatus	222003	Annelida	Lepidonotus squamatus	Intra-species
GU672517	AY894316	0.248	222003	Annelida	Lepidonotus squamatus	222003	Annelida	Lepidonotus squamatus	Intra-species
GU672518	AY894316	0.248	222003	Annelida	Lepidonotus squamatus	222003	Annelida	Lepidonotus squamatus	Intra-species
GU672519	AY894316	0.248	222003	Annelida	Lepidonotus squamatus	222003	Annelida	Lepidonotus squamatus	Intra-species
GU672528	AY894316	0.248	222003	Annelida	Lepidonotus squamatus	222003	Annelida	Lepidonotus squamatus	Intra-species
GU672533	AY894316	0.248	222003	Annelida	Lepidonotus squamatus	222003	Annelida	Lepidonotus squamatus	Intra-species
GU672542	AY894316	0.248	222003	Annelida	Lepidonotus squamatus	222003	Annelida	Lepidonotus squamatus	Intra-species
GU672543	AY894316	0.248	222003	Annelida	Lepidonotus squamatus	222003	Annelida	Lepidonotus squamatus	Intra-species
GU672545	AY894316	0.248	222003	Annelida	Lepidonotus squamatus	222003	Annelida	Lepidonotus squamatus	Intra-species
GU672555	AY894316	0.248	222003	Annelida	Lepidonotus squamatus	222003	Annelida	Lepidonotus squamatus	Intra-species
GU672556	AY894316	0.248	222003	Annelida	Lepidonotus squamatus	222003	Annelida	Lepidonotus squamatus	Intra-species
GU672607	AY894316	0.248	222003	Annelida	Lepidonotus squamatus	222003	Annelida	Lepidonotus squamatus	Intra-species
GU674155	FJ237568	0.247	106585	Chordata	Pristipomoides multidens	106585	Chordata	Pristipomoides multidens	Intra-species
GU674155	FJ237569	0.247	106585	Chordata	Pristipomoides multidens	106585	Chordata	Pristipomoides multidens	Intra-species
GU674155	FJ237567	0.25	106585	Chordata	Pristipomoides multidens	106585	Chordata	Pristipomoides multidens	Intra-species
GU674155	FJ237603	0.261	106585	Chordata	Pristipomoides multidens	106585	Chordata	Pristipomoides multidens	Intra-species
HM034154	GU674391	0.205	238054	Chordata	Naso annulatus	238054	Chordata	Naso annulatus	Intra-species
HM034241	HM034154	0.216	238054	Chordata	Naso annulatus	238054	Chordata	Naso annulatus	Intra-species
HQ149797	EU514512	1.026	197572	Chordata	Atule mate	197572	Chordata	Atule mate	Intra-species
HQ149797	EU514511	1.034	197572	Chordata	Atule mate	197572	Chordata	Atule mate	Intra-species
HQ149798	EU514511	1.034	197572	Chordata	Atule mate	197572	Chordata	Atule mate	Intra-species
HQ149798	EU514512	1.026	197572	Chordata	Atule mate	197572	Chordata	Atule mate	Intra-species
HQ149799	EU514511	1.034	197572	Chordata	Atule mate	197572	Chordata	Atule mate	Intra-species
HQ149799	EU514512	1.026	197572	Chordata	Atule mate	197572	Chordata	Atule mate	Intra-species
HQ149800	EU514512	1.036	197572	Chordata	Atule mate	197572	Chordata	Atule mate	Intra-species
HQ149800	EU514511	1.034	197572	Chordata	Atule mate	197572	Chordata	Atule mate	Intra-species
HQ149801	EU514512	1.026	197572	Chordata	Atule mate	197572	Chordata	Atule mate	Intra-species
HQ149801	EU514511	1.034	197572	Chordata	Atule mate	197572	Chordata	Atule mate	Intra-species
HQ264362	HQ264359	0.203	369809	Arthropoda	Halozetes belgicae	369809	Arthropoda	Halozetes belgicae	Intra-species
HQ264362	HQ264358	0.209	369809	Arthropoda	Halozetes belgicae	369809	Arthropoda	Halozetes belgicae	Intra-species
HQ264363	HQ264359	0.203	369809	Arthropoda	Halozetes belgicae	369809	Arthropoda	Halozetes belgicae	Intra-species
HQ264363	HQ264358	0.209	369809	Arthropoda	Halozetes belgicae	369809	Arthropoda	Halozetes belgicae	Intra-species
HQ264364	HQ264358	0.209	369809	Arthropoda	Halozetes belgicae	369809	Arthropoda	Halozetes belgicae	Intra-species
HQ264364	HQ264359	0.203	369809	Arthropoda	Halozetes belgicae	369809	Arthropoda	Halozetes belgicae	Intra-species
HQ264365	HQ264358	0.209	369809	Arthropoda	Halozetes belgicae	369809	Arthropoda	Halozetes belgicae	Intra-species
HQ264365	HQ264359	0.203	369809	Arthropoda	Halozetes belgicae	369809	Arthropoda	Halozetes belgicae	Intra-species
HQ264366	HQ264357	0.201	369809	Arthropoda	Halozetes belgicae	369809	Arthropoda	Halozetes belgicae	Intra-species
HQ264367	HQ264357	0.201	369809	Arthropoda	Halozetes belgicae	369809	Arthropoda	Halozetes belgicae	Intra-species
HQ264368	HQ264367	0.225	369809	Arthropoda	Halozetes belgicae	369809	Arthropoda	Halozetes belgicae	Intra-species
HQ264368	HQ264358	0.211	369809	Arthropoda	Halozetes belgicae	369809	Arthropoda	Halozetes belgicae	Intra-species
HQ264368	HQ264365	0.211	369809	Arthropoda	Halozetes belgicae	369809	Arthropoda	Halozetes belgicae	Intra-species
HQ264368	HQ264363	0.201	369809	Arthropoda	Halozetes belgicae	369809	Arthropoda	Halozetes belgicae	Intra-species
HQ264368	HQ264359	0.206	369809	Arthropoda	Halozetes belgicae	369809	Arthropoda	Halozetes belgicae	Intra-species
HQ264368	HQ264364	0.201	369809	Arthropoda	Halozetes belgicae	369809	Arthropoda	Halozetes belgicae	Intra-species
HQ264368	HQ264366	0.222	369809	Arthropoda	Halozetes belgicae	369809	Arthropoda	Halozetes belgicae	Intra-species
HQ264368	HQ264362	0.201	369809	Arthropoda	Halozetes belgicae	369809	Arthropoda	Halozetes belgicae	Intra-species
HQ264369	HQ264367	0.225	369809	Arthropoda	Halozetes belgicae	369809	Arthropoda	Halozetes belgicae	Intra-species
HQ264369	HQ264358	0.211	369809	Arthropoda	Halozetes belgicae	369809	Arthropoda	Halozetes belgicae	Intra-species
HQ264369	HQ264362	0.201	369809	Arthropoda	Halozetes belgicae	369809	Arthropoda	Halozetes belgicae	Intra-species
HQ264369	HQ264364	0.201	369809	Arthropoda	Halozetes belgicae	369809	Arthropoda	Halozetes belgicae	Intra-species
HQ264369	HQ264363	0.201	369809	Arthropoda	Halozetes belgicae	369809	Arthropoda	Halozetes belgicae	Intra-species
HQ264369	HQ264359	0.206	369809	Arthropoda	Halozetes belgicae	369809	Arthropoda	Halozetes belgicae	Intra-species
HQ264369	HQ264365	0.211	369809	Arthropoda	Halozetes belgicae	369809	Arthropoda	Halozetes belgicae	Intra-species
HQ264369	HQ264366	0.222	369809	Arthropoda	Halozetes belgicae	369809	Arthropoda	Halozetes belgicae	Intra-species
HQ264370	HQ264367	0.206	369809	Arthropoda	Halozetes belgicae	369809	Arthropoda	Halozetes belgicae	Intra-species
HQ264370	HQ264366	0.203	369809	Arthropoda	Halozetes belgicae	369809	Arthropoda	Halozetes belgicae	Intra-species
HQ264371	HQ264367	0.206	369809	Arthropoda	Halozetes belgicae	369809	Arthropoda	Halozetes belgicae	Intra-species
HQ264371	HQ264366	0.203	369809	Arthropoda	Halozetes belgicae	369809	Arthropoda	Halozetes belgicae	Intra-species
HQ264372	HQ264366	0.201	369809	Arthropoda	Halozetes belgicae	369809	Arthropoda	Halozetes belgicae	Intra-species
HQ264372	HQ264367	0.203	369809	Arthropoda	Halozetes belgicae	369809	Arthropoda	Halozetes belgicae	Intra-species
HQ264373	HQ264363	0.201	369809	Arthropoda	Halozetes belgicae	369809	Arthropoda	Halozetes belgicae	Intra-species
HQ264373	HQ264362	0.201	369809	Arthropoda	Halozetes belgicae	369809	Arthropoda	Halozetes belgicae	Intra-species
HQ264373	HQ264356	0.201	369809	Arthropoda	Halozetes belgicae	369809	Arthropoda	Halozetes belgicae	Intra-species
HQ264373	HQ264364	0.201	369809	Arthropoda	Halozetes belgicae	369809	Arthropoda	Halozetes belgicae	Intra-species
HQ264373	HQ264357	0.209	369809	Arthropoda	Halozetes belgicae	369809	Arthropoda	Halozetes belgicae	Intra-species
HQ264373	HQ264355	0.201	369809	Arthropoda	Halozetes belgicae	369809	Arthropoda	Halozetes belgicae	Intra-species
HQ264373	HQ264354	0.201	369809	Arthropoda	Halozetes belgicae	369809	Arthropoda	Halozetes belgicae	Intra-species
HQ264373	HQ264365	0.203	369809	Arthropoda	Halozetes belgicae	369809	Arthropoda	Halozetes belgicae	Intra-species
HQ264374	HQ264365	0.201	369809	Arthropoda	Halozetes belgicae	369809	Arthropoda	Halozetes belgicae	Intra-species
HQ264374	HQ264357	0.206	369809	Arthropoda	Halozetes belgicae	369809	Arthropoda	Halozetes belgicae	Intra-species
HQ264375	HQ264365	0.201	369809	Arthropoda	Halozetes belgicae	369809	Arthropoda	Halozetes belgicae	Intra-species
HQ264375	HQ264357	0.206	369809	Arthropoda	Halozetes belgicae	369809	Arthropoda	Halozetes belgicae	Intra-species
HQ264376	HQ264357	0.217	369809	Arthropoda	Halozetes belgicae	369809	Arthropoda	Halozetes belgicae	Intra-species
HQ264376	HQ264368	0.23	369809	Arthropoda	Halozetes belgicae	369809	Arthropoda	Halozetes belgicae	Intra-species
HQ264376	HQ264354	0.214	369809	Arthropoda	Halozetes belgicae	369809	Arthropoda	Halozetes belgicae	Intra-species
HQ264376	HQ264355	0.214	369809	Arthropoda	Halozetes belgicae	369809	Arthropoda	Halozetes belgicae	Intra-species
HQ264376	HQ264369	0.23	369809	Arthropoda	Halozetes belgicae	369809	Arthropoda	Halozetes belgicae	Intra-species
HQ264376	HQ264356	0.214	369809	Arthropoda	Halozetes belgicae	369809	Arthropoda	Halozetes belgicae	Intra-species
HQ264377	HQ264367	0.219	369809	Arthropoda	Halozetes belgicae	369809	Arthropoda	Halozetes belgicae	Intra-species
HQ264377	HQ264359	0.211	369809	Arthropoda	Halozetes belgicae	369809	Arthropoda	Halozetes belgicae	Intra-species
HQ264377	HQ264357	0.214	369809	Arthropoda	Halozetes belgicae	369809	Arthropoda	Halozetes belgicae	Intra-species
HQ264377	HQ264363	0.217	369809	Arthropoda	Halozetes belgicae	369809	Arthropoda	Halozetes belgicae	Intra-species
HQ264377	HQ264356	0.211	369809	Arthropoda	Halozetes belgicae	369809	Arthropoda	Halozetes belgicae	Intra-species
HQ264377	HQ264365	0.214	369809	Arthropoda	Halozetes belgicae	369809	Arthropoda	Halozetes belgicae	Intra-species
HQ264377	HQ264364	0.217	369809	Arthropoda	Halozetes belgicae	369809	Arthropoda	Halozetes belgicae	Intra-species
HQ264377	HQ264366	0.217	369809	Arthropoda	Halozetes belgicae	369809	Arthropoda	Halozetes belgicae	Intra-species
HQ264377	HQ264354	0.211	369809	Arthropoda	Halozetes belgicae	369809	Arthropoda	Halozetes belgicae	Intra-species
HQ264377	HQ264376	0.206	369809	Arthropoda	Halozetes belgicae	369809	Arthropoda	Halozetes belgicae	Intra-species
HQ264377	HQ264358	0.225	369809	Arthropoda	Halozetes belgicae	369809	Arthropoda	Halozetes belgicae	Intra-species
HQ264377	HQ264362	0.217	369809	Arthropoda	Halozetes belgicae	369809	Arthropoda	Halozetes belgicae	Intra-species
HQ264377	HQ264355	0.211	369809	Arthropoda	Halozetes belgicae	369809	Arthropoda	Halozetes belgicae	Intra-species
HQ264378	HQ264368	0.228	369809	Arthropoda	Halozetes belgicae	369809	Arthropoda	Halozetes belgicae	Intra-species
HQ264378	HQ264357	0.206	369809	Arthropoda	Halozetes belgicae	369809	Arthropoda	Halozetes belgicae	Intra-species
HQ264378	HQ264377	0.211	369809	Arthropoda	Halozetes belgicae	369809	Arthropoda	Halozetes belgicae	Intra-species
HQ264378	HQ264369	0.228	369809	Arthropoda	Halozetes belgicae	369809	Arthropoda	Halozetes belgicae	Intra-species
HQ264379	HQ264355	0.214	369809	Arthropoda	Halozetes belgicae	369809	Arthropoda	Halozetes belgicae	Intra-species
HQ264379	HQ264369	0.23	369809	Arthropoda	Halozetes belgicae	369809	Arthropoda	Halozetes belgicae	Intra-species
HQ264379	HQ264377	0.206	369809	Arthropoda	Halozetes belgicae	369809	Arthropoda	Halozetes belgicae	Intra-species
HQ264379	HQ264357	0.217	369809	Arthropoda	Halozetes belgicae	369809	Arthropoda	Halozetes belgicae	Intra-species
HQ264379	HQ264354	0.214	369809	Arthropoda	Halozetes belgicae	369809	Arthropoda	Halozetes belgicae	Intra-species
HQ264379	HQ264356	0.214	369809	Arthropoda	Halozetes belgicae	369809	Arthropoda	Halozetes belgicae	Intra-species
HQ264379	HQ264368	0.23	369809	Arthropoda	Halozetes belgicae	369809	Arthropoda	Halozetes belgicae	Intra-species
HQ264380	HQ264355	0.211	369809	Arthropoda	Halozetes belgicae	369809	Arthropoda	Halozetes belgicae	Intra-species
HQ264380	HQ264368	0.228	369809	Arthropoda	Halozetes belgicae	369809	Arthropoda	Halozetes belgicae	Intra-species
HQ264380	HQ264369	0.228	369809	Arthropoda	Halozetes belgicae	369809	Arthropoda	Halozetes belgicae	Intra-species
HQ264380	HQ264356	0.211	369809	Arthropoda	Halozetes belgicae	369809	Arthropoda	Halozetes belgicae	Intra-species
HQ264380	HQ264377	0.203	369809	Arthropoda	Halozetes belgicae	369809	Arthropoda	Halozetes belgicae	Intra-species
HQ264380	HQ264354	0.211	369809	Arthropoda	Halozetes belgicae	369809	Arthropoda	Halozetes belgicae	Intra-species
HQ264380	HQ264357	0.214	369809	Arthropoda	Halozetes belgicae	369809	Arthropoda	Halozetes belgicae	Intra-species
HQ264381	HQ264355	0.211	369809	Arthropoda	Halozetes belgicae	369809	Arthropoda	Halozetes belgicae	Intra-species
HQ264381	HQ264368	0.228	369809	Arthropoda	Halozetes belgicae	369809	Arthropoda	Halozetes belgicae	Intra-species
HQ264381	HQ264357	0.214	369809	Arthropoda	Halozetes belgicae	369809	Arthropoda	Halozetes belgicae	Intra-species
HQ264381	HQ264369	0.228	369809	Arthropoda	Halozetes belgicae	369809	Arthropoda	Halozetes belgicae	Intra-species
HQ264381	HQ264356	0.211	369809	Arthropoda	Halozetes belgicae	369809	Arthropoda	Halozetes belgicae	Intra-species
HQ264381	HQ264377	0.203	369809	Arthropoda	Halozetes belgicae	369809	Arthropoda	Halozetes belgicae	Intra-species
HQ264381	HQ264354	0.211	369809	Arthropoda	Halozetes belgicae	369809	Arthropoda	Halozetes belgicae	Intra-species
HQ560949	EU514511	1.034	197572	Chordata	Atule mate	197572	Chordata	Atule mate	Intra-species
HQ560949	EU514512	1.026	197572	Chordata	Atule mate	197572	Chordata	Atule mate	Intra-species
HQ560955	EU514512	1.026	197572	Chordata	Atule mate	197572	Chordata	Atule mate	Intra-species
HQ560955	EU514511	1.034	197572	Chordata	Atule mate	197572	Chordata	Atule mate	Intra-species
HQ560963	EU514512	1.036	197572	Chordata	Atule mate	197572	Chordata	Atule mate	Intra-species
HQ560963	EU514511	1.046	197572	Chordata	Atule mate	197572	Chordata	Atule mate	Intra-species
HQ560976	EU514511	1.034	197572	Chordata	Atule mate	197572	Chordata	Atule mate	Intra-species
HQ560976	EU514512	1.026	197572	Chordata	Atule mate	197572	Chordata	Atule mate	Intra-species
HQ560990	EU514512	1.016	197572	Chordata	Atule mate	197572	Chordata	Atule mate	Intra-species
HQ560990	EU514511	1.022	197572	Chordata	Atule mate	197572	Chordata	Atule mate	Intra-species
HQ561006	EU514512	1.026	197572	Chordata	Atule mate	197572	Chordata	Atule mate	Intra-species
HQ561006	EU514511	1.034	197572	Chordata	Atule mate	197572	Chordata	Atule mate	Intra-species
HQ561013	EU514512	1.026	197572	Chordata	Atule mate	197572	Chordata	Atule mate	Intra-species
HQ561013	EU514511	1.034	197572	Chordata	Atule mate	197572	Chordata	Atule mate	Intra-species
HQ561014	EU514511	1.035	197572	Chordata	Atule mate	197572	Chordata	Atule mate	Intra-species
HQ561014	EU514512	1.027	197572	Chordata	Atule mate	197572	Chordata	Atule mate	Intra-species
HQ561015	EU514512	1.036	197572	Chordata	Atule mate	197572	Chordata	Atule mate	Intra-species
HQ561015	EU514511	1.046	197572	Chordata	Atule mate	197572	Chordata	Atule mate	Intra-species
HQ561016	EU514511	1.046	197572	Chordata	Atule mate	197572	Chordata	Atule mate	Intra-species
HQ561016	EU514512	1.036	197572	Chordata	Atule mate	197572	Chordata	Atule mate	Intra-species
HQ561017	EU514511	1.034	197572	Chordata	Atule mate	197572	Chordata	Atule mate	Intra-species
HQ561017	EU514512	1.026	197572	Chordata	Atule mate	197572	Chordata	Atule mate	Intra-species
HQ561018	EU514512	1.026	197572	Chordata	Atule mate	197572	Chordata	Atule mate	Intra-species
HQ561018	EU514511	1.034	197572	Chordata	Atule mate	197572	Chordata	Atule mate	Intra-species
HQ561019	EU514511	1.034	197572	Chordata	Atule mate	197572	Chordata	Atule mate	Intra-species
HQ561019	EU514512	1.026	197572	Chordata	Atule mate	197572	Chordata	Atule mate	Intra-species
HQ561020	EU514512	1.026	197572	Chordata	Atule mate	197572	Chordata	Atule mate	Intra-species
HQ561020	EU514511	1.034	197572	Chordata	Atule mate	197572	Chordata	Atule mate	Intra-species
HQ561021	EU514511	1.034	197572	Chordata	Atule mate	197572	Chordata	Atule mate	Intra-species
HQ561021	EU514512	1.026	197572	Chordata	Atule mate	197572	Chordata	Atule mate	Intra-species
HQ561022	EU514511	1.046	197572	Chordata	Atule mate	197572	Chordata	Atule mate	Intra-species
HQ561022	EU514512	1.036	197572	Chordata	Atule mate	197572	Chordata	Atule mate	Intra-species
HQ945843	GU804922	0.205	990997	Chordata	Paracaesio sordida	990997	Chordata	Paracaesio sordida	Intra-species
HQ945843	GU805077	0.203	990997	Chordata	Paracaesio sordida	990997	Chordata	Paracaesio sordida	Intra-species
HQ945843	GU804969	0.205	990997	Chordata	Paracaesio sordida	990997	Chordata	Paracaesio sordida	Intra-species
HQ945843	GU805104	0.207	990997	Chordata	Paracaesio sordida	990997	Chordata	Paracaesio sordida	Intra-species
JF493958	HM034155	0.206	238054	Chordata	Naso annulatus	238054	Chordata	Naso annulatus	Intra-species
JF493958	HM034154	0.206	238054	Chordata	Naso annulatus	238054	Chordata	Naso annulatus	Intra-species
JF494060	HQ945843	0.202	990997	Chordata	Paracaesio sordida	990997	Chordata	Paracaesio sordida	Intra-species
JF494061	HQ945843	0.205	990997	Chordata	Paracaesio sordida	990997	Chordata	Paracaesio sordida	Intra-species
JF494062	HQ945843	0.207	990997	Chordata	Paracaesio sordida	990997	Chordata	Paracaesio sordida	Intra-species
JN242623	FJ237568	0.251	106585	Chordata	Pristipomoides multidens	106585	Chordata	Pristipomoides multidens	Intra-species
JN242623	FJ237567	0.251	106585	Chordata	Pristipomoides multidens	106585	Chordata	Pristipomoides multidens	Intra-species
JN242623	FJ237603	0.259	106585	Chordata	Pristipomoides multidens	106585	Chordata	Pristipomoides multidens	Intra-species
JN242623	FJ237569	0.249	106585	Chordata	Pristipomoides multidens	106585	Chordata	Pristipomoides multidens	Intra-species
JN242624	FJ237569	0.249	106585	Chordata	Pristipomoides multidens	106585	Chordata	Pristipomoides multidens	Intra-species
JN242624	FJ237603	0.259	106585	Chordata	Pristipomoides multidens	106585	Chordata	Pristipomoides multidens	Intra-species
JN242624	FJ237567	0.251	106585	Chordata	Pristipomoides multidens	106585	Chordata	Pristipomoides multidens	Intra-species
JN242624	FJ237568	0.251	106585	Chordata	Pristipomoides multidens	106585	Chordata	Pristipomoides multidens	Intra-species
JN242625	FJ237567	0.251	106585	Chordata	Pristipomoides multidens	106585	Chordata	Pristipomoides multidens	Intra-species
JN242625	FJ237569	0.249	106585	Chordata	Pristipomoides multidens	106585	Chordata	Pristipomoides multidens	Intra-species
JN242625	FJ237603	0.259	106585	Chordata	Pristipomoides multidens	106585	Chordata	Pristipomoides multidens	Intra-species
JN242625	FJ237568	0.251	106585	Chordata	Pristipomoides multidens	106585	Chordata	Pristipomoides multidens	Intra-species
JN242626	FJ237568	0.251	106585	Chordata	Pristipomoides multidens	106585	Chordata	Pristipomoides multidens	Intra-species
JN242626	FJ237569	0.249	106585	Chordata	Pristipomoides multidens	106585	Chordata	Pristipomoides multidens	Intra-species
JN242626	FJ237603	0.259	106585	Chordata	Pristipomoides multidens	106585	Chordata	Pristipomoides multidens	Intra-species
JN242626	FJ237567	0.251	106585	Chordata	Pristipomoides multidens	106585	Chordata	Pristipomoides multidens	Intra-species
JN242627	FJ237569	0.249	106585	Chordata	Pristipomoides multidens	106585	Chordata	Pristipomoides multidens	Intra-species
JN242627	FJ237603	0.259	106585	Chordata	Pristipomoides multidens	106585	Chordata	Pristipomoides multidens	Intra-species
JN242627	FJ237568	0.251	106585	Chordata	Pristipomoides multidens	106585	Chordata	Pristipomoides multidens	Intra-species
JN242627	FJ237567	0.251	106585	Chordata	Pristipomoides multidens	106585	Chordata	Pristipomoides multidens	Intra-species
JN242628	FJ237567	0.251	106585	Chordata	Pristipomoides multidens	106585	Chordata	Pristipomoides multidens	Intra-species
JN242628	FJ237603	0.259	106585	Chordata	Pristipomoides multidens	106585	Chordata	Pristipomoides multidens	Intra-species
JN242628	FJ237569	0.249	106585	Chordata	Pristipomoides multidens	106585	Chordata	Pristipomoides multidens	Intra-species
JN242628	FJ237568	0.251	106585	Chordata	Pristipomoides multidens	106585	Chordata	Pristipomoides multidens	Intra-species
JN242629	FJ237568	0.253	106585	Chordata	Pristipomoides multidens	106585	Chordata	Pristipomoides multidens	Intra-species
JN242629	FJ237569	0.251	106585	Chordata	Pristipomoides multidens	106585	Chordata	Pristipomoides multidens	Intra-species
JN242629	FJ237603	0.262	106585	Chordata	Pristipomoides multidens	106585	Chordata	Pristipomoides multidens	Intra-species
JN242629	FJ237567	0.253	106585	Chordata	Pristipomoides multidens	106585	Chordata	Pristipomoides multidens	Intra-species
JN311703	HQ945843	0.205	990997	Chordata	Paracaesio sordida	990997	Chordata	Paracaesio sordida	Intra-species
JN311851	FJ237603	0.255	106585	Chordata	Pristipomoides multidens	106585	Chordata	Pristipomoides multidens	Intra-species
JN311851	FJ237569	0.244	106585	Chordata	Pristipomoides multidens	106585	Chordata	Pristipomoides multidens	Intra-species
JN311851	FJ237568	0.247	106585	Chordata	Pristipomoides multidens	106585	Chordata	Pristipomoides multidens	Intra-species
JN311851	FJ237567	0.247	106585	Chordata	Pristipomoides multidens	106585	Chordata	Pristipomoides multidens	Intra-species
JN313002	EU514512	1.026	197572	Chordata	Atule mate	197572	Chordata	Atule mate	Intra-species
JN313002	EU514511	1.034	197572	Chordata	Atule mate	197572	Chordata	Atule mate	Intra-species
JN313039	EU514511	1.034	197572	Chordata	Atule mate	197572	Chordata	Atule mate	Intra-species
JN313039	EU514512	1.026	197572	Chordata	Atule mate	197572	Chordata	Atule mate	Intra-species
JN313040	EU514511	1.034	197572	Chordata	Atule mate	197572	Chordata	Atule mate	Intra-species
JN313040	EU514512	1.026	197572	Chordata	Atule mate	197572	Chordata	Atule mate	Intra-species
JQ350124	HM034154	0.222	238054	Chordata	Naso annulatus	238054	Chordata	Naso annulatus	Intra-species
JQ350125	HM034154	0.222	238054	Chordata	Naso annulatus	238054	Chordata	Naso annulatus	Intra-species
JQ432181	GU673185	0.202	1146991	Chordata	Synodus dermatogenys	1146991	Chordata	Synodus dermatogenys	Intra-species
JQ654706	HQ589270	0.272	7852	Chordata	Alopias vulpinus	7852	Chordata	Alopias vulpinus	Intra-species
JQ654706	FJ895092	0.203	7852	Chordata	Alopias vulpinus	7852	Chordata	Alopias vulpinus	Intra-species
JQ654706	HM990650	0.299	7852	Chordata	Alopias vulpinus	7852	Chordata	Alopias vulpinus	Intra-species
JQ681331	FJ237569	0.251	106585	Chordata	Pristipomoides multidens	106585	Chordata	Pristipomoides multidens	Intra-species
JQ681331	FJ237568	0.251	106585	Chordata	Pristipomoides multidens	106585	Chordata	Pristipomoides multidens	Intra-species
JQ681331	FJ237603	0.266	106585	Chordata	Pristipomoides multidens	106585	Chordata	Pristipomoides multidens	Intra-species
JQ681331	FJ237567	0.253	106585	Chordata	Pristipomoides multidens	106585	Chordata	Pristipomoides multidens	Intra-species
JQ715456	DQ417457	0.206	193294	Bryozoa	Watersipora subtorquata	193294	Bryozoa	Watersipora subtorquata	Intra-species
JQ715457	DQ417457	0.201	193294	Bryozoa	Watersipora subtorquata	193294	Bryozoa	Watersipora subtorquata	Intra-species
JQ715459	DQ417457	0.202	193294	Bryozoa	Watersipora subtorquata	193294	Bryozoa	Watersipora subtorquata	Intra-species
JX183877	AF061428	0.987	10212	Bryozoa	Bugula neritina	10212	Bryozoa	Bugula neritina	Intra-species
JX183877	AF061421	1.041	10212	Bryozoa	Bugula neritina	10212	Bryozoa	Bugula neritina	Intra-species
JX183877	HQ896145	1.036	10212	Bryozoa	Bugula neritina	10212	Bryozoa	Bugula neritina	Intra-species
JX183877	AF061430	1.008	10212	Bryozoa	Bugula neritina	10212	Bryozoa	Bugula neritina	Intra-species
JX183877	HQ896146	1.036	10212	Bryozoa	Bugula neritina	10212	Bryozoa	Bugula neritina	Intra-species
JX183877	AF061432	1.001	10212	Bryozoa	Bugula neritina	10212	Bryozoa	Bugula neritina	Intra-species
JX183877	AF061429	1.041	10212	Bryozoa	Bugula neritina	10212	Bryozoa	Bugula neritina	Intra-species
JX183877	AF061422	1	10212	Bryozoa	Bugula neritina	10212	Bryozoa	Bugula neritina	Intra-species
JX183877	AF061419	1.041	10212	Bryozoa	Bugula neritina	10212	Bryozoa	Bugula neritina	Intra-species
JX183877	AF061427	1.041	10212	Bryozoa	Bugula neritina	10212	Bryozoa	Bugula neritina	Intra-species
JX183877	AY173426	1.012	10212	Bryozoa	Bugula neritina	10212	Bryozoa	Bugula neritina	Intra-species
JX183877	AF061426	0.989	10212	Bryozoa	Bugula neritina	10212	Bryozoa	Bugula neritina	Intra-species
JX183877	AY633485	1.006	10212	Bryozoa	Bugula neritina	10212	Bryozoa	Bugula neritina	Intra-species
JX183877	AF061424	0.986	10212	Bryozoa	Bugula neritina	10212	Bryozoa	Bugula neritina	Intra-species
JX183877	AF061418	1.008	10212	Bryozoa	Bugula neritina	10212	Bryozoa	Bugula neritina	Intra-species
JX183877	AY173425	1.02	10212	Bryozoa	Bugula neritina	10212	Bryozoa	Bugula neritina	Intra-species
JX183877	AF061425	1.026	10212	Bryozoa	Bugula neritina	10212	Bryozoa	Bugula neritina	Intra-species
JX183877	AF061420	1.041	10212	Bryozoa	Bugula neritina	10212	Bryozoa	Bugula neritina	Intra-species
JX183877	AF061431	1.008	10212	Bryozoa	Bugula neritina	10212	Bryozoa	Bugula neritina	Intra-species
JX183877	AF061417	1.008	10212	Bryozoa	Bugula neritina	10212	Bryozoa	Bugula neritina	Intra-species
JX183877	AF061423	1.041	10212	Bryozoa	Bugula neritina	10212	Bryozoa	Bugula neritina	Intra-species
JX183877	AY633486	1.048	10212	Bryozoa	Bugula neritina	10212	Bryozoa	Bugula neritina	Intra-species
JX183878	AY633485	0.999	10212	Bryozoa	Bugula neritina	10212	Bryozoa	Bugula neritina	Intra-species
JX183878	AF061431	1.019	10212	Bryozoa	Bugula neritina	10212	Bryozoa	Bugula neritina	Intra-species
JX183878	AY633486	1.037	10212	Bryozoa	Bugula neritina	10212	Bryozoa	Bugula neritina	Intra-species
JX183878	AF061417	1.019	10212	Bryozoa	Bugula neritina	10212	Bryozoa	Bugula neritina	Intra-species
JX183878	AF061427	1.03	10212	Bryozoa	Bugula neritina	10212	Bryozoa	Bugula neritina	Intra-species
JX183878	HQ896145	1.025	10212	Bryozoa	Bugula neritina	10212	Bryozoa	Bugula neritina	Intra-species
JX183878	AF061421	1.03	10212	Bryozoa	Bugula neritina	10212	Bryozoa	Bugula neritina	Intra-species
JX183878	AF061418	1.019	10212	Bryozoa	Bugula neritina	10212	Bryozoa	Bugula neritina	Intra-species
JX183878	AY173425	1.012	10212	Bryozoa	Bugula neritina	10212	Bryozoa	Bugula neritina	Intra-species
JX183878	AF061428	0.995	10212	Bryozoa	Bugula neritina	10212	Bryozoa	Bugula neritina	Intra-species
JX183878	AF061420	1.03	10212	Bryozoa	Bugula neritina	10212	Bryozoa	Bugula neritina	Intra-species
JX183878	HQ896146	1.025	10212	Bryozoa	Bugula neritina	10212	Bryozoa	Bugula neritina	Intra-species
JX183878	AF061430	1.019	10212	Bryozoa	Bugula neritina	10212	Bryozoa	Bugula neritina	Intra-species
JX183878	AF061424	0.994	10212	Bryozoa	Bugula neritina	10212	Bryozoa	Bugula neritina	Intra-species
JX183878	AY173426	1.003	10212	Bryozoa	Bugula neritina	10212	Bryozoa	Bugula neritina	Intra-species
JX183878	AF061432	0.993	10212	Bryozoa	Bugula neritina	10212	Bryozoa	Bugula neritina	Intra-species
JX183878	AF061423	1.03	10212	Bryozoa	Bugula neritina	10212	Bryozoa	Bugula neritina	Intra-species
JX183878	AF061429	1.03	10212	Bryozoa	Bugula neritina	10212	Bryozoa	Bugula neritina	Intra-species
JX183878	AF061426	0.982	10212	Bryozoa	Bugula neritina	10212	Bryozoa	Bugula neritina	Intra-species
JX183878	AF061425	1.018	10212	Bryozoa	Bugula neritina	10212	Bryozoa	Bugula neritina	Intra-species
JX183878	AF061419	1.03	10212	Bryozoa	Bugula neritina	10212	Bryozoa	Bugula neritina	Intra-species
JX183878	AF061422	1.008	10212	Bryozoa	Bugula neritina	10212	Bryozoa	Bugula neritina	Intra-species
JX183879	AF061428	0.987	10212	Bryozoa	Bugula neritina	10212	Bryozoa	Bugula neritina	Intra-species
JX183879	AF061417	1.008	10212	Bryozoa	Bugula neritina	10212	Bryozoa	Bugula neritina	Intra-species
JX183879	AF061420	1.041	10212	Bryozoa	Bugula neritina	10212	Bryozoa	Bugula neritina	Intra-species
JX183879	AY633486	1.048	10212	Bryozoa	Bugula neritina	10212	Bryozoa	Bugula neritina	Intra-species
JX183879	HQ896145	1.036	10212	Bryozoa	Bugula neritina	10212	Bryozoa	Bugula neritina	Intra-species
JX183879	AF061430	1.008	10212	Bryozoa	Bugula neritina	10212	Bryozoa	Bugula neritina	Intra-species
JX183879	AF061419	1.041	10212	Bryozoa	Bugula neritina	10212	Bryozoa	Bugula neritina	Intra-species
JX183879	AY173426	1.02	10212	Bryozoa	Bugula neritina	10212	Bryozoa	Bugula neritina	Intra-species
JX183879	AF061423	1.041	10212	Bryozoa	Bugula neritina	10212	Bryozoa	Bugula neritina	Intra-species
JX183879	AF061425	1.026	10212	Bryozoa	Bugula neritina	10212	Bryozoa	Bugula neritina	Intra-species
JX183879	AF061426	0.989	10212	Bryozoa	Bugula neritina	10212	Bryozoa	Bugula neritina	Intra-species
JX183879	AF061429	1.041	10212	Bryozoa	Bugula neritina	10212	Bryozoa	Bugula neritina	Intra-species
JX183879	AF061424	0.986	10212	Bryozoa	Bugula neritina	10212	Bryozoa	Bugula neritina	Intra-species
JX183879	AF061421	1.041	10212	Bryozoa	Bugula neritina	10212	Bryozoa	Bugula neritina	Intra-species
JX183879	AF061432	1.001	10212	Bryozoa	Bugula neritina	10212	Bryozoa	Bugula neritina	Intra-species
JX183879	AF061422	1	10212	Bryozoa	Bugula neritina	10212	Bryozoa	Bugula neritina	Intra-species
JX183879	AF061431	1.008	10212	Bryozoa	Bugula neritina	10212	Bryozoa	Bugula neritina	Intra-species
JX183879	HQ896146	1.036	10212	Bryozoa	Bugula neritina	10212	Bryozoa	Bugula neritina	Intra-species
JX183879	AY173425	1.02	10212	Bryozoa	Bugula neritina	10212	Bryozoa	Bugula neritina	Intra-species
JX183879	AF061427	1.041	10212	Bryozoa	Bugula neritina	10212	Bryozoa	Bugula neritina	Intra-species
JX183879	AY633485	1.006	10212	Bryozoa	Bugula neritina	10212	Bryozoa	Bugula neritina	Intra-species
JX183879	AF061418	1.008	10212	Bryozoa	Bugula neritina	10212	Bryozoa	Bugula neritina	Intra-species
JX183880	AF061430	0.997	10212	Bryozoa	Bugula neritina	10212	Bryozoa	Bugula neritina	Intra-species
JX183880	AF061429	1.03	10212	Bryozoa	Bugula neritina	10212	Bryozoa	Bugula neritina	Intra-species
JX183880	AF061421	1.03	10212	Bryozoa	Bugula neritina	10212	Bryozoa	Bugula neritina	Intra-species
JX183880	AF061420	1.03	10212	Bryozoa	Bugula neritina	10212	Bryozoa	Bugula neritina	Intra-species
JX183880	HQ896145	1.025	10212	Bryozoa	Bugula neritina	10212	Bryozoa	Bugula neritina	Intra-species
JX183880	AF061419	1.03	10212	Bryozoa	Bugula neritina	10212	Bryozoa	Bugula neritina	Intra-species
JX183880	AF061418	0.997	10212	Bryozoa	Bugula neritina	10212	Bryozoa	Bugula neritina	Intra-species
JX183880	AF061417	0.997	10212	Bryozoa	Bugula neritina	10212	Bryozoa	Bugula neritina	Intra-species
JX183880	AF061428	0.979	10212	Bryozoa	Bugula neritina	10212	Bryozoa	Bugula neritina	Intra-species
JX183880	AF061423	1.03	10212	Bryozoa	Bugula neritina	10212	Bryozoa	Bugula neritina	Intra-species
JX183880	AF061425	1.018	10212	Bryozoa	Bugula neritina	10212	Bryozoa	Bugula neritina	Intra-species
JX183880	AY173426	1.012	10212	Bryozoa	Bugula neritina	10212	Bryozoa	Bugula neritina	Intra-species
JX183880	AF061426	0.982	10212	Bryozoa	Bugula neritina	10212	Bryozoa	Bugula neritina	Intra-species
JX183880	AF061427	1.03	10212	Bryozoa	Bugula neritina	10212	Bryozoa	Bugula neritina	Intra-species
JX183880	AY633486	1.037	10212	Bryozoa	Bugula neritina	10212	Bryozoa	Bugula neritina	Intra-species
JX183880	AY633485	0.999	10212	Bryozoa	Bugula neritina	10212	Bryozoa	Bugula neritina	Intra-species
JX183880	HQ896146	1.025	10212	Bryozoa	Bugula neritina	10212	Bryozoa	Bugula neritina	Intra-species
JX183880	AF061424	0.979	10212	Bryozoa	Bugula neritina	10212	Bryozoa	Bugula neritina	Intra-species
JX183880	AF061422	0.992	10212	Bryozoa	Bugula neritina	10212	Bryozoa	Bugula neritina	Intra-species
JX183880	AF061431	0.997	10212	Bryozoa	Bugula neritina	10212	Bryozoa	Bugula neritina	Intra-species
JX183880	AY173425	1.012	10212	Bryozoa	Bugula neritina	10212	Bryozoa	Bugula neritina	Intra-species
JX183880	AF061432	0.993	10212	Bryozoa	Bugula neritina	10212	Bryozoa	Bugula neritina	Intra-species
JX183881	AF061425	1.042	10212	Bryozoa	Bugula neritina	10212	Bryozoa	Bugula neritina	Intra-species
JX183881	AY633486	1.016	10212	Bryozoa	Bugula neritina	10212	Bryozoa	Bugula neritina	Intra-species
JX183881	AF061430	0.975	10212	Bryozoa	Bugula neritina	10212	Bryozoa	Bugula neritina	Intra-species
JX183881	AY633485	0.983	10212	Bryozoa	Bugula neritina	10212	Bryozoa	Bugula neritina	Intra-species
JX183881	AF061432	0.993	10212	Bryozoa	Bugula neritina	10212	Bryozoa	Bugula neritina	Intra-species
JX183881	HQ896146	1.003	10212	Bryozoa	Bugula neritina	10212	Bryozoa	Bugula neritina	Intra-species
JX183881	AF061427	1.019	10212	Bryozoa	Bugula neritina	10212	Bryozoa	Bugula neritina	Intra-species
JX183881	HQ896145	1.003	10212	Bryozoa	Bugula neritina	10212	Bryozoa	Bugula neritina	Intra-species
JX183881	AF061418	0.975	10212	Bryozoa	Bugula neritina	10212	Bryozoa	Bugula neritina	Intra-species
JX183881	AF061417	0.975	10212	Bryozoa	Bugula neritina	10212	Bryozoa	Bugula neritina	Intra-species
JX183881	AF061422	1	10212	Bryozoa	Bugula neritina	10212	Bryozoa	Bugula neritina	Intra-species
JX183881	AF061421	1.019	10212	Bryozoa	Bugula neritina	10212	Bryozoa	Bugula neritina	Intra-species
JX183881	AF061424	0.986	10212	Bryozoa	Bugula neritina	10212	Bryozoa	Bugula neritina	Intra-species
JX183881	AF061428	0.987	10212	Bryozoa	Bugula neritina	10212	Bryozoa	Bugula neritina	Intra-species
JX183881	AY173425	1.003	10212	Bryozoa	Bugula neritina	10212	Bryozoa	Bugula neritina	Intra-species
JX183881	AF061420	1.019	10212	Bryozoa	Bugula neritina	10212	Bryozoa	Bugula neritina	Intra-species
JX183881	AF061423	1.064	10212	Bryozoa	Bugula neritina	10212	Bryozoa	Bugula neritina	Intra-species
JX183881	AF061429	1.019	10212	Bryozoa	Bugula neritina	10212	Bryozoa	Bugula neritina	Intra-species
JX183881	AY173426	1.045	10212	Bryozoa	Bugula neritina	10212	Bryozoa	Bugula neritina	Intra-species
JX183881	AF061431	0.975	10212	Bryozoa	Bugula neritina	10212	Bryozoa	Bugula neritina	Intra-species
JX183881	AF061419	1.064	10212	Bryozoa	Bugula neritina	10212	Bryozoa	Bugula neritina	Intra-species
JX183881	AF061426	0.982	10212	Bryozoa	Bugula neritina	10212	Bryozoa	Bugula neritina	Intra-species
JX183882	HQ896145	1.003	10212	Bryozoa	Bugula neritina	10212	Bryozoa	Bugula neritina	Intra-species
JX183882	AF061431	0.975	10212	Bryozoa	Bugula neritina	10212	Bryozoa	Bugula neritina	Intra-species
JX183882	AY173425	1.003	10212	Bryozoa	Bugula neritina	10212	Bryozoa	Bugula neritina	Intra-species
JX183882	AF061424	0.986	10212	Bryozoa	Bugula neritina	10212	Bryozoa	Bugula neritina	Intra-species
JX183882	AF061422	1	10212	Bryozoa	Bugula neritina	10212	Bryozoa	Bugula neritina	Intra-species
JX183882	AF061421	1.019	10212	Bryozoa	Bugula neritina	10212	Bryozoa	Bugula neritina	Intra-species
JX183882	AF061423	1.064	10212	Bryozoa	Bugula neritina	10212	Bryozoa	Bugula neritina	Intra-species
JX183882	AF061432	0.993	10212	Bryozoa	Bugula neritina	10212	Bryozoa	Bugula neritina	Intra-species
JX183882	AY173426	1.045	10212	Bryozoa	Bugula neritina	10212	Bryozoa	Bugula neritina	Intra-species
JX183882	AF061419	1.064	10212	Bryozoa	Bugula neritina	10212	Bryozoa	Bugula neritina	Intra-species
JX183882	AF061417	0.975	10212	Bryozoa	Bugula neritina	10212	Bryozoa	Bugula neritina	Intra-species
JX183882	AF061428	0.987	10212	Bryozoa	Bugula neritina	10212	Bryozoa	Bugula neritina	Intra-species
JX183882	AF061426	0.982	10212	Bryozoa	Bugula neritina	10212	Bryozoa	Bugula neritina	Intra-species
JX183882	AF061425	1.042	10212	Bryozoa	Bugula neritina	10212	Bryozoa	Bugula neritina	Intra-species
JX183882	HQ896146	1.003	10212	Bryozoa	Bugula neritina	10212	Bryozoa	Bugula neritina	Intra-species
JX183882	AF061429	1.019	10212	Bryozoa	Bugula neritina	10212	Bryozoa	Bugula neritina	Intra-species
JX183882	AY633486	1.016	10212	Bryozoa	Bugula neritina	10212	Bryozoa	Bugula neritina	Intra-species
JX183882	AY633485	0.983	10212	Bryozoa	Bugula neritina	10212	Bryozoa	Bugula neritina	Intra-species
JX183882	AF061430	0.975	10212	Bryozoa	Bugula neritina	10212	Bryozoa	Bugula neritina	Intra-species
JX183882	AF061418	0.975	10212	Bryozoa	Bugula neritina	10212	Bryozoa	Bugula neritina	Intra-species
JX183882	AF061420	1.019	10212	Bryozoa	Bugula neritina	10212	Bryozoa	Bugula neritina	Intra-species
JX183882	AF061427	1.019	10212	Bryozoa	Bugula neritina	10212	Bryozoa	Bugula neritina	Intra-species
JX183883	AY633486	1.048	10212	Bryozoa	Bugula neritina	10212	Bryozoa	Bugula neritina	Intra-species
JX183883	AF061417	1.019	10212	Bryozoa	Bugula neritina	10212	Bryozoa	Bugula neritina	Intra-species
JX183883	AF061425	1.034	10212	Bryozoa	Bugula neritina	10212	Bryozoa	Bugula neritina	Intra-species
JX183883	AF061428	0.995	10212	Bryozoa	Bugula neritina	10212	Bryozoa	Bugula neritina	Intra-species
JX183883	AF061418	1.019	10212	Bryozoa	Bugula neritina	10212	Bryozoa	Bugula neritina	Intra-species
JX183883	HQ896145	1.036	10212	Bryozoa	Bugula neritina	10212	Bryozoa	Bugula neritina	Intra-species
JX183883	AY633485	1.014	10212	Bryozoa	Bugula neritina	10212	Bryozoa	Bugula neritina	Intra-species
JX183883	AF061426	0.996	10212	Bryozoa	Bugula neritina	10212	Bryozoa	Bugula neritina	Intra-species
JX183883	AY173425	1.028	10212	Bryozoa	Bugula neritina	10212	Bryozoa	Bugula neritina	Intra-species
JX183883	AF061420	1.053	10212	Bryozoa	Bugula neritina	10212	Bryozoa	Bugula neritina	Intra-species
JX183883	AF061432	1.01	10212	Bryozoa	Bugula neritina	10212	Bryozoa	Bugula neritina	Intra-species
JX183883	AF061427	1.053	10212	Bryozoa	Bugula neritina	10212	Bryozoa	Bugula neritina	Intra-species
JX183883	AF061419	1.053	10212	Bryozoa	Bugula neritina	10212	Bryozoa	Bugula neritina	Intra-species
JX183883	AF061431	1.019	10212	Bryozoa	Bugula neritina	10212	Bryozoa	Bugula neritina	Intra-species
JX183883	HQ896146	1.036	10212	Bryozoa	Bugula neritina	10212	Bryozoa	Bugula neritina	Intra-species
JX183883	AF061421	1.053	10212	Bryozoa	Bugula neritina	10212	Bryozoa	Bugula neritina	Intra-species
JX183883	AY173426	1.028	10212	Bryozoa	Bugula neritina	10212	Bryozoa	Bugula neritina	Intra-species
JX183883	AF061429	1.053	10212	Bryozoa	Bugula neritina	10212	Bryozoa	Bugula neritina	Intra-species
JX183883	AF061422	1.008	10212	Bryozoa	Bugula neritina	10212	Bryozoa	Bugula neritina	Intra-species
JX183883	AF061424	0.994	10212	Bryozoa	Bugula neritina	10212	Bryozoa	Bugula neritina	Intra-species
JX183883	AF061430	1.019	10212	Bryozoa	Bugula neritina	10212	Bryozoa	Bugula neritina	Intra-species
JX183883	AF061423	1.053	10212	Bryozoa	Bugula neritina	10212	Bryozoa	Bugula neritina	Intra-species
JX183884	AF061417	1.03	10212	Bryozoa	Bugula neritina	10212	Bryozoa	Bugula neritina	Intra-species
JX183884	AF061426	1.015	10212	Bryozoa	Bugula neritina	10212	Bryozoa	Bugula neritina	Intra-species
JX183884	AF061418	1.03	10212	Bryozoa	Bugula neritina	10212	Bryozoa	Bugula neritina	Intra-species
JX183884	AF061425	1.041	10212	Bryozoa	Bugula neritina	10212	Bryozoa	Bugula neritina	Intra-species
JX183884	AY633486	1.048	10212	Bryozoa	Bugula neritina	10212	Bryozoa	Bugula neritina	Intra-species
JX183884	AY633485	1.006	10212	Bryozoa	Bugula neritina	10212	Bryozoa	Bugula neritina	Intra-species
JX183884	AY173425	1.012	10212	Bryozoa	Bugula neritina	10212	Bryozoa	Bugula neritina	Intra-species
JX183884	AF061420	1.053	10212	Bryozoa	Bugula neritina	10212	Bryozoa	Bugula neritina	Intra-species
JX183884	HQ896145	1.048	10212	Bryozoa	Bugula neritina	10212	Bryozoa	Bugula neritina	Intra-species
JX183884	AY173426	0.995	10212	Bryozoa	Bugula neritina	10212	Bryozoa	Bugula neritina	Intra-species
JX183884	AF061424	1.007	10212	Bryozoa	Bugula neritina	10212	Bryozoa	Bugula neritina	Intra-species
JX183884	HQ896146	1.048	10212	Bryozoa	Bugula neritina	10212	Bryozoa	Bugula neritina	Intra-species
JX183884	AF061423	1.076	10212	Bryozoa	Bugula neritina	10212	Bryozoa	Bugula neritina	Intra-species
JX183884	AF061429	1.053	10212	Bryozoa	Bugula neritina	10212	Bryozoa	Bugula neritina	Intra-species
JX183884	AF061422	1.022	10212	Bryozoa	Bugula neritina	10212	Bryozoa	Bugula neritina	Intra-species
JX183884	AF061432	1.015	10212	Bryozoa	Bugula neritina	10212	Bryozoa	Bugula neritina	Intra-species
JX183884	AF061428	1.008	10212	Bryozoa	Bugula neritina	10212	Bryozoa	Bugula neritina	Intra-species
JX183884	AF061430	1.03	10212	Bryozoa	Bugula neritina	10212	Bryozoa	Bugula neritina	Intra-species
JX183884	AF061431	1.03	10212	Bryozoa	Bugula neritina	10212	Bryozoa	Bugula neritina	Intra-species
JX183884	AF061427	1.053	10212	Bryozoa	Bugula neritina	10212	Bryozoa	Bugula neritina	Intra-species
JX183884	AF061419	1.076	10212	Bryozoa	Bugula neritina	10212	Bryozoa	Bugula neritina	Intra-species
JX183884	AF061421	1.053	10212	Bryozoa	Bugula neritina	10212	Bryozoa	Bugula neritina	Intra-species
JX261012	EU514512	1.026	197572	Chordata	Atule mate	197572	Chordata	Atule mate	Intra-species
JX261012	EU514511	1.034	197572	Chordata	Atule mate	197572	Chordata	Atule mate	Intra-species
JX261035	EU514512	1.026	197572	Chordata	Atule mate	197572	Chordata	Atule mate	Intra-species
JX261035	EU514511	1.034	197572	Chordata	Atule mate	197572	Chordata	Atule mate	Intra-species
JX261056	EU514511	1.046	197572	Chordata	Atule mate	197572	Chordata	Atule mate	Intra-species
JX261056	EU514512	1.036	197572	Chordata	Atule mate	197572	Chordata	Atule mate	Intra-species
JX261063	EU514512	1.026	197572	Chordata	Atule mate	197572	Chordata	Atule mate	Intra-species
JX261063	EU514511	1.034	197572	Chordata	Atule mate	197572	Chordata	Atule mate	Intra-species
JX261075	EU514512	1.026	197572	Chordata	Atule mate	197572	Chordata	Atule mate	Intra-species
JX261075	EU514511	1.034	197572	Chordata	Atule mate	197572	Chordata	Atule mate	Intra-species
JX261094	EU514512	1.026	197572	Chordata	Atule mate	197572	Chordata	Atule mate	Intra-species
JX261094	EU514511	1.034	197572	Chordata	Atule mate	197572	Chordata	Atule mate	Intra-species
JX261194	EU514511	1.034	197572	Chordata	Atule mate	197572	Chordata	Atule mate	Intra-species
JX261194	EU514512	1.026	197572	Chordata	Atule mate	197572	Chordata	Atule mate	Intra-species
JX261200	EU514512	1.026	197572	Chordata	Atule mate	197572	Chordata	Atule mate	Intra-species
JX261200	EU514511	1.034	197572	Chordata	Atule mate	197572	Chordata	Atule mate	Intra-species
JX261218	EU514511	1.034	197572	Chordata	Atule mate	197572	Chordata	Atule mate	Intra-species
JX261218	EU514512	1.026	197572	Chordata	Atule mate	197572	Chordata	Atule mate	Intra-species
JX261222	EU514512	1.026	197572	Chordata	Atule mate	197572	Chordata	Atule mate	Intra-species
JX261222	EU514511	1.034	197572	Chordata	Atule mate	197572	Chordata	Atule mate	Intra-species
JX261226	EU514511	1.046	197572	Chordata	Atule mate	197572	Chordata	Atule mate	Intra-species
JX261226	EU514512	1.036	197572	Chordata	Atule mate	197572	Chordata	Atule mate	Intra-species
JX261233	EU514511	1.046	197572	Chordata	Atule mate	197572	Chordata	Atule mate	Intra-species
JX261233	EU514512	1.036	197572	Chordata	Atule mate	197572	Chordata	Atule mate	Intra-species
JX261249	EU514512	1.026	197572	Chordata	Atule mate	197572	Chordata	Atule mate	Intra-species
JX261249	EU514511	1.034	197572	Chordata	Atule mate	197572	Chordata	Atule mate	Intra-species
JX261254	EU514511	1.034	197572	Chordata	Atule mate	197572	Chordata	Atule mate	Intra-species
JX261254	EU514512	1.026	197572	Chordata	Atule mate	197572	Chordata	Atule mate	Intra-species
JX261261	EU514512	1.026	197572	Chordata	Atule mate	197572	Chordata	Atule mate	Intra-species
JX261261	EU514511	1.034	197572	Chordata	Atule mate	197572	Chordata	Atule mate	Intra-species
JX261280	EU514512	1.026	197572	Chordata	Atule mate	197572	Chordata	Atule mate	Intra-species
JX261280	EU514511	1.034	197572	Chordata	Atule mate	197572	Chordata	Atule mate	Intra-species
JX261289	EU514511	1.046	197572	Chordata	Atule mate	197572	Chordata	Atule mate	Intra-species
JX261289	EU514512	1.036	197572	Chordata	Atule mate	197572	Chordata	Atule mate	Intra-species
JX261302	EU514512	1.036	197572	Chordata	Atule mate	197572	Chordata	Atule mate	Intra-species
JX261302	EU514511	1.046	197572	Chordata	Atule mate	197572	Chordata	Atule mate	Intra-species
JX261349	EU514511	1.034	197572	Chordata	Atule mate	197572	Chordata	Atule mate	Intra-species
JX261349	EU514512	1.026	197572	Chordata	Atule mate	197572	Chordata	Atule mate	Intra-species
JX261370	EU514511	1.046	197572	Chordata	Atule mate	197572	Chordata	Atule mate	Intra-species
JX261370	EU514512	1.036	197572	Chordata	Atule mate	197572	Chordata	Atule mate	Intra-species
JX261374	EU514511	1.034	197572	Chordata	Atule mate	197572	Chordata	Atule mate	Intra-species
JX261374	EU514512	1.026	197572	Chordata	Atule mate	197572	Chordata	Atule mate	Intra-species
JX261378	EU514511	1.046	197572	Chordata	Atule mate	197572	Chordata	Atule mate	Intra-species
JX261378	EU514512	1.036	197572	Chordata	Atule mate	197572	Chordata	Atule mate	Intra-species
JX261401	EU514511	1.046	197572	Chordata	Atule mate	197572	Chordata	Atule mate	Intra-species
JX261401	EU514512	1.036	197572	Chordata	Atule mate	197572	Chordata	Atule mate	Intra-species
JX261405	EU514512	1.016	197572	Chordata	Atule mate	197572	Chordata	Atule mate	Intra-species
JX261405	EU514511	1.022	197572	Chordata	Atule mate	197572	Chordata	Atule mate	Intra-species
JX261410	EU514512	1.036	197572	Chordata	Atule mate	197572	Chordata	Atule mate	Intra-species
JX261410	EU514511	1.046	197572	Chordata	Atule mate	197572	Chordata	Atule mate	Intra-species
JX261412	EU514512	1.016	197572	Chordata	Atule mate	197572	Chordata	Atule mate	Intra-species
JX261412	EU514511	1.022	197572	Chordata	Atule mate	197572	Chordata	Atule mate	Intra-species
JX261413	EU514512	1.026	197572	Chordata	Atule mate	197572	Chordata	Atule mate	Intra-species
JX261413	EU514511	1.034	197572	Chordata	Atule mate	197572	Chordata	Atule mate	Intra-species
JX261419	EU514511	1.034	197572	Chordata	Atule mate	197572	Chordata	Atule mate	Intra-species
JX261419	EU514512	1.026	197572	Chordata	Atule mate	197572	Chordata	Atule mate	Intra-species
JX261429	EU514512	1.026	197572	Chordata	Atule mate	197572	Chordata	Atule mate	Intra-species
JX261429	EU514511	1.034	197572	Chordata	Atule mate	197572	Chordata	Atule mate	Intra-species
JX261437	EU514512	1.026	197572	Chordata	Atule mate	197572	Chordata	Atule mate	Intra-species
JX261437	EU514511	1.034	197572	Chordata	Atule mate	197572	Chordata	Atule mate	Intra-species
JX261445	EU514512	1.026	197572	Chordata	Atule mate	197572	Chordata	Atule mate	Intra-species
JX261445	EU514511	1.034	197572	Chordata	Atule mate	197572	Chordata	Atule mate	Intra-species
JX261446	EU514512	1.016	197572	Chordata	Atule mate	197572	Chordata	Atule mate	Intra-species
JX261446	EU514511	1.022	197572	Chordata	Atule mate	197572	Chordata	Atule mate	Intra-species
JX261474	EU514512	1.026	197572	Chordata	Atule mate	197572	Chordata	Atule mate	Intra-species
JX261474	EU514511	1.034	197572	Chordata	Atule mate	197572	Chordata	Atule mate	Intra-species
JX261484	EU514511	1.022	197572	Chordata	Atule mate	197572	Chordata	Atule mate	Intra-species
JX261484	EU514512	1.016	197572	Chordata	Atule mate	197572	Chordata	Atule mate	Intra-species
JX261501	EU514511	1.034	197572	Chordata	Atule mate	197572	Chordata	Atule mate	Intra-species
JX261501	EU514512	1.026	197572	Chordata	Atule mate	197572	Chordata	Atule mate	Intra-species
JX261505	EU514512	1.026	197572	Chordata	Atule mate	197572	Chordata	Atule mate	Intra-species
JX261505	EU514511	1.034	197572	Chordata	Atule mate	197572	Chordata	Atule mate	Intra-species
JX261507	EU514512	1.026	197572	Chordata	Atule mate	197572	Chordata	Atule mate	Intra-species
JX261507	EU514511	1.034	197572	Chordata	Atule mate	197572	Chordata	Atule mate	Intra-species
JX261512	EU514511	1.034	197572	Chordata	Atule mate	197572	Chordata	Atule mate	Intra-species
JX261512	EU514512	1.026	197572	Chordata	Atule mate	197572	Chordata	Atule mate	Intra-species
JX261531	EU514511	1.034	197572	Chordata	Atule mate	197572	Chordata	Atule mate	Intra-species
JX261531	EU514512	1.026	197572	Chordata	Atule mate	197572	Chordata	Atule mate	Intra-species
JX261533	EU514511	1.034	197572	Chordata	Atule mate	197572	Chordata	Atule mate	Intra-species
JX261533	EU514512	1.026	197572	Chordata	Atule mate	197572	Chordata	Atule mate	Intra-species
JX261535	EU514512	1.026	197572	Chordata	Atule mate	197572	Chordata	Atule mate	Intra-species
JX261535	EU514511	1.034	197572	Chordata	Atule mate	197572	Chordata	Atule mate	Intra-species
JX261545	EU514512	1.026	197572	Chordata	Atule mate	197572	Chordata	Atule mate	Intra-species
JX261545	EU514511	1.034	197572	Chordata	Atule mate	197572	Chordata	Atule mate	Intra-species
JX261546	EU514512	1.026	197572	Chordata	Atule mate	197572	Chordata	Atule mate	Intra-species
JX261546	EU514511	1.034	197572	Chordata	Atule mate	197572	Chordata	Atule mate	Intra-species
JX261548	EU514511	1.034	197572	Chordata	Atule mate	197572	Chordata	Atule mate	Intra-species
JX261548	EU514512	1.026	197572	Chordata	Atule mate	197572	Chordata	Atule mate	Intra-species
JX261557	EU514511	1.046	197572	Chordata	Atule mate	197572	Chordata	Atule mate	Intra-species
JX261557	EU514512	1.036	197572	Chordata	Atule mate	197572	Chordata	Atule mate	Intra-species
JX261578	EU514512	1.026	197572	Chordata	Atule mate	197572	Chordata	Atule mate	Intra-species
JX261578	EU514511	1.034	197572	Chordata	Atule mate	197572	Chordata	Atule mate	Intra-species
JX261597	EU514511	1.034	197572	Chordata	Atule mate	197572	Chordata	Atule mate	Intra-species
JX261597	EU514512	1.026	197572	Chordata	Atule mate	197572	Chordata	Atule mate	Intra-species
JX261612	EU514511	1.034	197572	Chordata	Atule mate	197572	Chordata	Atule mate	Intra-species
JX261612	EU514512	1.026	197572	Chordata	Atule mate	197572	Chordata	Atule mate	Intra-species
JX261614	EU514511	1.034	197572	Chordata	Atule mate	197572	Chordata	Atule mate	Intra-species
JX261614	EU514512	1.026	197572	Chordata	Atule mate	197572	Chordata	Atule mate	Intra-species
JX261633	EU514511	1.034	197572	Chordata	Atule mate	197572	Chordata	Atule mate	Intra-species
JX261633	EU514512	1.026	197572	Chordata	Atule mate	197572	Chordata	Atule mate	Intra-species
JX261635	EU514512	1.026	197572	Chordata	Atule mate	197572	Chordata	Atule mate	Intra-species
JX261635	EU514511	1.034	197572	Chordata	Atule mate	197572	Chordata	Atule mate	Intra-species
JX503013	AY894316	0.235	222003	Annelida	Lepidonotus squamatus	222003	Annelida	Lepidonotus squamatus	Intra-species
JX503014	AY894316	0.237	222003	Annelida	Lepidonotus squamatus	222003	Annelida	Lepidonotus squamatus	Intra-species
JX503015	AY894316	0.235	222003	Annelida	Lepidonotus squamatus	222003	Annelida	Lepidonotus squamatus	Intra-species
JX999070	EF093529	1.169	281732	Porifera	Tethya aurantium	281732	Porifera	Tethya aurantium	Intra-species
JX999070	EF558571	1.169	281732	Porifera	Tethya aurantium	281732	Porifera	Tethya aurantium	Intra-species
JX999070	EF093531	1.169	281732	Porifera	Tethya aurantium	281732	Porifera	Tethya aurantium	Intra-species
JX999070	EF093530	1.169	281732	Porifera	Tethya aurantium	281732	Porifera	Tethya aurantium	Intra-species
JX999070	EF584565	1.169	281732	Porifera	Tethya aurantium	281732	Porifera	Tethya aurantium	Intra-species
KC129721	JX183881	1.015	10212	Bryozoa	Bugula neritina	10212	Bryozoa	Bugula neritina	Intra-species
KC129721	JX183879	0.992	10212	Bryozoa	Bugula neritina	10212	Bryozoa	Bugula neritina	Intra-species
KC129721	JX183883	1	10212	Bryozoa	Bugula neritina	10212	Bryozoa	Bugula neritina	Intra-species
KC129721	JX183884	0.984	10212	Bryozoa	Bugula neritina	10212	Bryozoa	Bugula neritina	Intra-species
KC129721	JX183882	1.015	10212	Bryozoa	Bugula neritina	10212	Bryozoa	Bugula neritina	Intra-species
KC129721	JX183880	0.985	10212	Bryozoa	Bugula neritina	10212	Bryozoa	Bugula neritina	Intra-species
KC129721	JX183878	0.978	10212	Bryozoa	Bugula neritina	10212	Bryozoa	Bugula neritina	Intra-species
KC129721	JX183877	0.985	10212	Bryozoa	Bugula neritina	10212	Bryozoa	Bugula neritina	Intra-species
KC129722	JX183879	1	10212	Bryozoa	Bugula neritina	10212	Bryozoa	Bugula neritina	Intra-species
KC129722	JX183882	1	10212	Bryozoa	Bugula neritina	10212	Bryozoa	Bugula neritina	Intra-species
KC129722	JX183878	0.992	10212	Bryozoa	Bugula neritina	10212	Bryozoa	Bugula neritina	Intra-species
KC129722	JX183883	1.007	10212	Bryozoa	Bugula neritina	10212	Bryozoa	Bugula neritina	Intra-species
KC129722	JX183877	1	10212	Bryozoa	Bugula neritina	10212	Bryozoa	Bugula neritina	Intra-species
KC129722	JX183880	0.992	10212	Bryozoa	Bugula neritina	10212	Bryozoa	Bugula neritina	Intra-species
KC129722	JX183881	1	10212	Bryozoa	Bugula neritina	10212	Bryozoa	Bugula neritina	Intra-species
KC129722	JX183884	1.016	10212	Bryozoa	Bugula neritina	10212	Bryozoa	Bugula neritina	Intra-species
KC129723	JX183880	0.992	10212	Bryozoa	Bugula neritina	10212	Bryozoa	Bugula neritina	Intra-species
KC129723	JX183879	1	10212	Bryozoa	Bugula neritina	10212	Bryozoa	Bugula neritina	Intra-species
KC129723	JX183883	1.007	10212	Bryozoa	Bugula neritina	10212	Bryozoa	Bugula neritina	Intra-species
KC129723	JX183881	1	10212	Bryozoa	Bugula neritina	10212	Bryozoa	Bugula neritina	Intra-species
KC129723	JX183878	0.992	10212	Bryozoa	Bugula neritina	10212	Bryozoa	Bugula neritina	Intra-species
KC129723	JX183884	1.016	10212	Bryozoa	Bugula neritina	10212	Bryozoa	Bugula neritina	Intra-species
KC129723	JX183877	1	10212	Bryozoa	Bugula neritina	10212	Bryozoa	Bugula neritina	Intra-species
KC129723	JX183882	1	10212	Bryozoa	Bugula neritina	10212	Bryozoa	Bugula neritina	Intra-species
KC129724	JX183880	0.992	10212	Bryozoa	Bugula neritina	10212	Bryozoa	Bugula neritina	Intra-species
KC129724	JX183878	0.992	10212	Bryozoa	Bugula neritina	10212	Bryozoa	Bugula neritina	Intra-species
KC129724	JX183884	1.016	10212	Bryozoa	Bugula neritina	10212	Bryozoa	Bugula neritina	Intra-species
KC129724	JX183883	1.007	10212	Bryozoa	Bugula neritina	10212	Bryozoa	Bugula neritina	Intra-species
KC129724	JX183877	1	10212	Bryozoa	Bugula neritina	10212	Bryozoa	Bugula neritina	Intra-species
KC129724	JX183882	1	10212	Bryozoa	Bugula neritina	10212	Bryozoa	Bugula neritina	Intra-species
KC129724	JX183881	1	10212	Bryozoa	Bugula neritina	10212	Bryozoa	Bugula neritina	Intra-species
KC129724	JX183879	1	10212	Bryozoa	Bugula neritina	10212	Bryozoa	Bugula neritina	Intra-species
KC129725	JX183884	1.033	10212	Bryozoa	Bugula neritina	10212	Bryozoa	Bugula neritina	Intra-species
KC129725	JX183882	1.007	10212	Bryozoa	Bugula neritina	10212	Bryozoa	Bugula neritina	Intra-species
KC129725	JX183878	1.015	10212	Bryozoa	Bugula neritina	10212	Bryozoa	Bugula neritina	Intra-species
KC129725	JX183880	1.015	10212	Bryozoa	Bugula neritina	10212	Bryozoa	Bugula neritina	Intra-species
KC129725	JX183877	1.024	10212	Bryozoa	Bugula neritina	10212	Bryozoa	Bugula neritina	Intra-species
KC129725	JX183881	1.007	10212	Bryozoa	Bugula neritina	10212	Bryozoa	Bugula neritina	Intra-species
KC129725	JX183879	1.024	10212	Bryozoa	Bugula neritina	10212	Bryozoa	Bugula neritina	Intra-species
KC129725	JX183883	1.033	10212	Bryozoa	Bugula neritina	10212	Bryozoa	Bugula neritina	Intra-species
KC129726	JX183878	1.015	10212	Bryozoa	Bugula neritina	10212	Bryozoa	Bugula neritina	Intra-species
KC129726	JX183877	1.024	10212	Bryozoa	Bugula neritina	10212	Bryozoa	Bugula neritina	Intra-species
KC129726	JX183883	1.033	10212	Bryozoa	Bugula neritina	10212	Bryozoa	Bugula neritina	Intra-species
KC129726	JX183882	1.007	10212	Bryozoa	Bugula neritina	10212	Bryozoa	Bugula neritina	Intra-species
KC129726	JX183880	1.015	10212	Bryozoa	Bugula neritina	10212	Bryozoa	Bugula neritina	Intra-species
KC129726	JX183881	1.007	10212	Bryozoa	Bugula neritina	10212	Bryozoa	Bugula neritina	Intra-species
KC129726	JX183884	1.033	10212	Bryozoa	Bugula neritina	10212	Bryozoa	Bugula neritina	Intra-species
KC129726	JX183879	1.024	10212	Bryozoa	Bugula neritina	10212	Bryozoa	Bugula neritina	Intra-species
KC129727	JX183881	1	10212	Bryozoa	Bugula neritina	10212	Bryozoa	Bugula neritina	Intra-species
KC129727	JX183880	0.992	10212	Bryozoa	Bugula neritina	10212	Bryozoa	Bugula neritina	Intra-species
KC129727	JX183884	1.016	10212	Bryozoa	Bugula neritina	10212	Bryozoa	Bugula neritina	Intra-species
KC129727	JX183879	1	10212	Bryozoa	Bugula neritina	10212	Bryozoa	Bugula neritina	Intra-species
KC129727	JX183878	0.992	10212	Bryozoa	Bugula neritina	10212	Bryozoa	Bugula neritina	Intra-species
KC129727	JX183882	1	10212	Bryozoa	Bugula neritina	10212	Bryozoa	Bugula neritina	Intra-species
KC129727	JX183877	1	10212	Bryozoa	Bugula neritina	10212	Bryozoa	Bugula neritina	Intra-species
KC129727	JX183883	1.007	10212	Bryozoa	Bugula neritina	10212	Bryozoa	Bugula neritina	Intra-species
KC129728	JX183882	1.007	10212	Bryozoa	Bugula neritina	10212	Bryozoa	Bugula neritina	Intra-species
KC129728	JX183884	1.033	10212	Bryozoa	Bugula neritina	10212	Bryozoa	Bugula neritina	Intra-species
KC129728	JX183881	1.007	10212	Bryozoa	Bugula neritina	10212	Bryozoa	Bugula neritina	Intra-species
KC129728	JX183877	1.024	10212	Bryozoa	Bugula neritina	10212	Bryozoa	Bugula neritina	Intra-species
KC129728	JX183879	1.024	10212	Bryozoa	Bugula neritina	10212	Bryozoa	Bugula neritina	Intra-species
KC129728	JX183878	1.015	10212	Bryozoa	Bugula neritina	10212	Bryozoa	Bugula neritina	Intra-species
KC129728	JX183883	1.033	10212	Bryozoa	Bugula neritina	10212	Bryozoa	Bugula neritina	Intra-species
KC129728	JX183880	1.015	10212	Bryozoa	Bugula neritina	10212	Bryozoa	Bugula neritina	Intra-species
KC129729	JX183880	0.992	10212	Bryozoa	Bugula neritina	10212	Bryozoa	Bugula neritina	Intra-species
KC129729	JX183879	1	10212	Bryozoa	Bugula neritina	10212	Bryozoa	Bugula neritina	Intra-species
KC129729	JX183878	0.992	10212	Bryozoa	Bugula neritina	10212	Bryozoa	Bugula neritina	Intra-species
KC129729	JX183882	1	10212	Bryozoa	Bugula neritina	10212	Bryozoa	Bugula neritina	Intra-species
KC129729	JX183883	1.007	10212	Bryozoa	Bugula neritina	10212	Bryozoa	Bugula neritina	Intra-species
KC129729	JX183877	1	10212	Bryozoa	Bugula neritina	10212	Bryozoa	Bugula neritina	Intra-species
KC129729	JX183881	1	10212	Bryozoa	Bugula neritina	10212	Bryozoa	Bugula neritina	Intra-species
KC129729	JX183884	1.016	10212	Bryozoa	Bugula neritina	10212	Bryozoa	Bugula neritina	Intra-species
KC129730	JX183883	1.033	10212	Bryozoa	Bugula neritina	10212	Bryozoa	Bugula neritina	Intra-species
KC129730	JX183877	1.033	10212	Bryozoa	Bugula neritina	10212	Bryozoa	Bugula neritina	Intra-species
KC129730	JX183880	1.024	10212	Bryozoa	Bugula neritina	10212	Bryozoa	Bugula neritina	Intra-species
KC129730	JX183881	1.007	10212	Bryozoa	Bugula neritina	10212	Bryozoa	Bugula neritina	Intra-species
KC129730	JX183884	1.016	10212	Bryozoa	Bugula neritina	10212	Bryozoa	Bugula neritina	Intra-species
KC129730	JX183879	1.033	10212	Bryozoa	Bugula neritina	10212	Bryozoa	Bugula neritina	Intra-species
KC129730	JX183882	1.007	10212	Bryozoa	Bugula neritina	10212	Bryozoa	Bugula neritina	Intra-species
KC129730	JX183878	1.024	10212	Bryozoa	Bugula neritina	10212	Bryozoa	Bugula neritina	Intra-species
KC129731	JX183884	1.028	10212	Bryozoa	Bugula neritina	10212	Bryozoa	Bugula neritina	Intra-species
KC129731	JX183879	1.044	10212	Bryozoa	Bugula neritina	10212	Bryozoa	Bugula neritina	Intra-species
KC129731	JX183878	1.035	10212	Bryozoa	Bugula neritina	10212	Bryozoa	Bugula neritina	Intra-species
KC129731	JX183880	1.035	10212	Bryozoa	Bugula neritina	10212	Bryozoa	Bugula neritina	Intra-species
KC129731	JX183882	1.018	10212	Bryozoa	Bugula neritina	10212	Bryozoa	Bugula neritina	Intra-species
KC129731	JX183883	1.044	10212	Bryozoa	Bugula neritina	10212	Bryozoa	Bugula neritina	Intra-species
KC129731	JX183877	1.044	10212	Bryozoa	Bugula neritina	10212	Bryozoa	Bugula neritina	Intra-species
KC129731	JX183881	1.018	10212	Bryozoa	Bugula neritina	10212	Bryozoa	Bugula neritina	Intra-species
KC129732	JX183879	1.04	10212	Bryozoa	Bugula neritina	10212	Bryozoa	Bugula neritina	Intra-species
KC129732	JX183881	1.014	10212	Bryozoa	Bugula neritina	10212	Bryozoa	Bugula neritina	Intra-species
KC129732	JX183884	1.028	10212	Bryozoa	Bugula neritina	10212	Bryozoa	Bugula neritina	Intra-species
KC129732	JX183880	1.032	10212	Bryozoa	Bugula neritina	10212	Bryozoa	Bugula neritina	Intra-species
KC129732	JX183878	1.032	10212	Bryozoa	Bugula neritina	10212	Bryozoa	Bugula neritina	Intra-species
KC129732	JX183877	1.04	10212	Bryozoa	Bugula neritina	10212	Bryozoa	Bugula neritina	Intra-species
KC129732	JX183883	1.04	10212	Bryozoa	Bugula neritina	10212	Bryozoa	Bugula neritina	Intra-species
KC129732	JX183882	1.014	10212	Bryozoa	Bugula neritina	10212	Bryozoa	Bugula neritina	Intra-species
KC129733	JX183880	1.033	10212	Bryozoa	Bugula neritina	10212	Bryozoa	Bugula neritina	Intra-species
KC129733	JX183878	1.033	10212	Bryozoa	Bugula neritina	10212	Bryozoa	Bugula neritina	Intra-species
KC129733	JX183877	1.042	10212	Bryozoa	Bugula neritina	10212	Bryozoa	Bugula neritina	Intra-species
KC129733	JX183882	1.016	10212	Bryozoa	Bugula neritina	10212	Bryozoa	Bugula neritina	Intra-species
KC129733	JX183879	1.042	10212	Bryozoa	Bugula neritina	10212	Bryozoa	Bugula neritina	Intra-species
KC129733	JX183884	1.032	10212	Bryozoa	Bugula neritina	10212	Bryozoa	Bugula neritina	Intra-species
KC129733	JX183883	1.042	10212	Bryozoa	Bugula neritina	10212	Bryozoa	Bugula neritina	Intra-species
KC129733	JX183881	1.016	10212	Bryozoa	Bugula neritina	10212	Bryozoa	Bugula neritina	Intra-species
KC129734	JX183881	1.045	10212	Bryozoa	Bugula neritina	10212	Bryozoa	Bugula neritina	Intra-species
KC129734	JX183878	1.001	10212	Bryozoa	Bugula neritina	10212	Bryozoa	Bugula neritina	Intra-species
KC129734	JX183884	1.002	10212	Bryozoa	Bugula neritina	10212	Bryozoa	Bugula neritina	Intra-species
KC129734	JX183883	1.018	10212	Bryozoa	Bugula neritina	10212	Bryozoa	Bugula neritina	Intra-species
KC129734	JX183880	1.01	10212	Bryozoa	Bugula neritina	10212	Bryozoa	Bugula neritina	Intra-species
KC129734	JX183882	1.045	10212	Bryozoa	Bugula neritina	10212	Bryozoa	Bugula neritina	Intra-species
KC129734	JX183879	1.018	10212	Bryozoa	Bugula neritina	10212	Bryozoa	Bugula neritina	Intra-species
KC129734	JX183877	1.01	10212	Bryozoa	Bugula neritina	10212	Bryozoa	Bugula neritina	Intra-species
KC129735	JX183880	1	10212	Bryozoa	Bugula neritina	10212	Bryozoa	Bugula neritina	Intra-species
KC129735	JX183883	1.015	10212	Bryozoa	Bugula neritina	10212	Bryozoa	Bugula neritina	Intra-species
KC129735	JX183882	0.992	10212	Bryozoa	Bugula neritina	10212	Bryozoa	Bugula neritina	Intra-species
KC129735	JX183881	0.992	10212	Bryozoa	Bugula neritina	10212	Bryozoa	Bugula neritina	Intra-species
KC129735	JX183884	1.016	10212	Bryozoa	Bugula neritina	10212	Bryozoa	Bugula neritina	Intra-species
KC129735	JX183878	1	10212	Bryozoa	Bugula neritina	10212	Bryozoa	Bugula neritina	Intra-species
KC129735	JX183879	1.007	10212	Bryozoa	Bugula neritina	10212	Bryozoa	Bugula neritina	Intra-species
KC129735	JX183877	1.007	10212	Bryozoa	Bugula neritina	10212	Bryozoa	Bugula neritina	Intra-species
KC129736	JX183882	0.992	10212	Bryozoa	Bugula neritina	10212	Bryozoa	Bugula neritina	Intra-species
KC129736	JX183877	1.007	10212	Bryozoa	Bugula neritina	10212	Bryozoa	Bugula neritina	Intra-species
KC129736	JX183880	1	10212	Bryozoa	Bugula neritina	10212	Bryozoa	Bugula neritina	Intra-species
KC129736	JX183879	1.007	10212	Bryozoa	Bugula neritina	10212	Bryozoa	Bugula neritina	Intra-species
KC129736	JX183881	0.992	10212	Bryozoa	Bugula neritina	10212	Bryozoa	Bugula neritina	Intra-species
KC129736	JX183878	1	10212	Bryozoa	Bugula neritina	10212	Bryozoa	Bugula neritina	Intra-species
KC129736	JX183883	1.015	10212	Bryozoa	Bugula neritina	10212	Bryozoa	Bugula neritina	Intra-species
KC129736	JX183884	1.016	10212	Bryozoa	Bugula neritina	10212	Bryozoa	Bugula neritina	Intra-species
KC129737	JX183877	1.007	10212	Bryozoa	Bugula neritina	10212	Bryozoa	Bugula neritina	Intra-species
KC129737	JX183881	0.992	10212	Bryozoa	Bugula neritina	10212	Bryozoa	Bugula neritina	Intra-species
KC129737	JX183880	1	10212	Bryozoa	Bugula neritina	10212	Bryozoa	Bugula neritina	Intra-species
KC129737	JX183884	1.016	10212	Bryozoa	Bugula neritina	10212	Bryozoa	Bugula neritina	Intra-species
KC129737	JX183879	1.007	10212	Bryozoa	Bugula neritina	10212	Bryozoa	Bugula neritina	Intra-species
KC129737	JX183882	0.992	10212	Bryozoa	Bugula neritina	10212	Bryozoa	Bugula neritina	Intra-species
KC129737	JX183878	1	10212	Bryozoa	Bugula neritina	10212	Bryozoa	Bugula neritina	Intra-species
KC129737	JX183883	1.015	10212	Bryozoa	Bugula neritina	10212	Bryozoa	Bugula neritina	Intra-species
KC129738	JX183879	1.007	10212	Bryozoa	Bugula neritina	10212	Bryozoa	Bugula neritina	Intra-species
KC129738	JX183881	0.992	10212	Bryozoa	Bugula neritina	10212	Bryozoa	Bugula neritina	Intra-species
KC129738	JX183878	1	10212	Bryozoa	Bugula neritina	10212	Bryozoa	Bugula neritina	Intra-species
KC129738	JX183880	1	10212	Bryozoa	Bugula neritina	10212	Bryozoa	Bugula neritina	Intra-species
KC129738	JX183883	1.015	10212	Bryozoa	Bugula neritina	10212	Bryozoa	Bugula neritina	Intra-species
KC129738	JX183884	1.016	10212	Bryozoa	Bugula neritina	10212	Bryozoa	Bugula neritina	Intra-species
KC129738	JX183877	1.007	10212	Bryozoa	Bugula neritina	10212	Bryozoa	Bugula neritina	Intra-species
KC129738	JX183882	0.992	10212	Bryozoa	Bugula neritina	10212	Bryozoa	Bugula neritina	Intra-species
KC129739	JX183878	1	10212	Bryozoa	Bugula neritina	10212	Bryozoa	Bugula neritina	Intra-species
KC129739	JX183881	0.992	10212	Bryozoa	Bugula neritina	10212	Bryozoa	Bugula neritina	Intra-species
KC129739	JX183884	1.016	10212	Bryozoa	Bugula neritina	10212	Bryozoa	Bugula neritina	Intra-species
KC129739	JX183883	1.015	10212	Bryozoa	Bugula neritina	10212	Bryozoa	Bugula neritina	Intra-species
KC129739	JX183879	1.007	10212	Bryozoa	Bugula neritina	10212	Bryozoa	Bugula neritina	Intra-species
KC129739	JX183880	1	10212	Bryozoa	Bugula neritina	10212	Bryozoa	Bugula neritina	Intra-species
KC129739	JX183882	0.992	10212	Bryozoa	Bugula neritina	10212	Bryozoa	Bugula neritina	Intra-species
KC129739	JX183877	1.007	10212	Bryozoa	Bugula neritina	10212	Bryozoa	Bugula neritina	Intra-species
KC129740	JX183878	1	10212	Bryozoa	Bugula neritina	10212	Bryozoa	Bugula neritina	Intra-species
KC129740	JX183877	1.007	10212	Bryozoa	Bugula neritina	10212	Bryozoa	Bugula neritina	Intra-species
KC129740	JX183882	0.992	10212	Bryozoa	Bugula neritina	10212	Bryozoa	Bugula neritina	Intra-species
KC129740	JX183879	1.007	10212	Bryozoa	Bugula neritina	10212	Bryozoa	Bugula neritina	Intra-species
KC129740	JX183880	1	10212	Bryozoa	Bugula neritina	10212	Bryozoa	Bugula neritina	Intra-species
KC129740	JX183884	1.016	10212	Bryozoa	Bugula neritina	10212	Bryozoa	Bugula neritina	Intra-species
KC129740	JX183881	0.992	10212	Bryozoa	Bugula neritina	10212	Bryozoa	Bugula neritina	Intra-species
KC129740	JX183883	1.015	10212	Bryozoa	Bugula neritina	10212	Bryozoa	Bugula neritina	Intra-species
KC129741	JX183878	1	10212	Bryozoa	Bugula neritina	10212	Bryozoa	Bugula neritina	Intra-species
KC129741	JX183877	1.007	10212	Bryozoa	Bugula neritina	10212	Bryozoa	Bugula neritina	Intra-species
KC129741	JX183884	1.016	10212	Bryozoa	Bugula neritina	10212	Bryozoa	Bugula neritina	Intra-species
KC129741	JX183879	1.007	10212	Bryozoa	Bugula neritina	10212	Bryozoa	Bugula neritina	Intra-species
KC129741	JX183883	1.015	10212	Bryozoa	Bugula neritina	10212	Bryozoa	Bugula neritina	Intra-species
KC129741	JX183881	0.992	10212	Bryozoa	Bugula neritina	10212	Bryozoa	Bugula neritina	Intra-species
KC129741	JX183882	0.992	10212	Bryozoa	Bugula neritina	10212	Bryozoa	Bugula neritina	Intra-species
KC129741	JX183880	1	10212	Bryozoa	Bugula neritina	10212	Bryozoa	Bugula neritina	Intra-species
KC129742	JX183879	1.007	10212	Bryozoa	Bugula neritina	10212	Bryozoa	Bugula neritina	Intra-species
KC129742	JX183880	1	10212	Bryozoa	Bugula neritina	10212	Bryozoa	Bugula neritina	Intra-species
KC129742	JX183877	1.007	10212	Bryozoa	Bugula neritina	10212	Bryozoa	Bugula neritina	Intra-species
KC129742	JX183878	1	10212	Bryozoa	Bugula neritina	10212	Bryozoa	Bugula neritina	Intra-species
KC129742	JX183884	1.016	10212	Bryozoa	Bugula neritina	10212	Bryozoa	Bugula neritina	Intra-species
KC129742	JX183881	0.992	10212	Bryozoa	Bugula neritina	10212	Bryozoa	Bugula neritina	Intra-species
KC129742	JX183882	0.992	10212	Bryozoa	Bugula neritina	10212	Bryozoa	Bugula neritina	Intra-species
KC129742	JX183883	1.015	10212	Bryozoa	Bugula neritina	10212	Bryozoa	Bugula neritina	Intra-species
KC129743	JX183883	1.015	10212	Bryozoa	Bugula neritina	10212	Bryozoa	Bugula neritina	Intra-species
KC129743	JX183879	1.007	10212	Bryozoa	Bugula neritina	10212	Bryozoa	Bugula neritina	Intra-species
KC129743	JX183877	1.007	10212	Bryozoa	Bugula neritina	10212	Bryozoa	Bugula neritina	Intra-species
KC129743	JX183878	1	10212	Bryozoa	Bugula neritina	10212	Bryozoa	Bugula neritina	Intra-species
KC129743	JX183881	0.992	10212	Bryozoa	Bugula neritina	10212	Bryozoa	Bugula neritina	Intra-species
KC129743	JX183880	1	10212	Bryozoa	Bugula neritina	10212	Bryozoa	Bugula neritina	Intra-species
KC129743	JX183884	1.016	10212	Bryozoa	Bugula neritina	10212	Bryozoa	Bugula neritina	Intra-species
KC129743	JX183882	0.992	10212	Bryozoa	Bugula neritina	10212	Bryozoa	Bugula neritina	Intra-species
KC129744	JX183880	0.992	10212	Bryozoa	Bugula neritina	10212	Bryozoa	Bugula neritina	Intra-species
KC129744	JX183884	1.016	10212	Bryozoa	Bugula neritina	10212	Bryozoa	Bugula neritina	Intra-species
KC129744	JX183877	1	10212	Bryozoa	Bugula neritina	10212	Bryozoa	Bugula neritina	Intra-species
KC129744	JX183881	1	10212	Bryozoa	Bugula neritina	10212	Bryozoa	Bugula neritina	Intra-species
KC129744	JX183879	1	10212	Bryozoa	Bugula neritina	10212	Bryozoa	Bugula neritina	Intra-species
KC129744	JX183883	1.007	10212	Bryozoa	Bugula neritina	10212	Bryozoa	Bugula neritina	Intra-species
KC129744	JX183878	0.992	10212	Bryozoa	Bugula neritina	10212	Bryozoa	Bugula neritina	Intra-species
KC129744	JX183882	1	10212	Bryozoa	Bugula neritina	10212	Bryozoa	Bugula neritina	Intra-species
KC129745	JX183879	1	10212	Bryozoa	Bugula neritina	10212	Bryozoa	Bugula neritina	Intra-species
KC129745	JX183884	1.016	10212	Bryozoa	Bugula neritina	10212	Bryozoa	Bugula neritina	Intra-species
KC129745	JX183881	1	10212	Bryozoa	Bugula neritina	10212	Bryozoa	Bugula neritina	Intra-species
KC129745	JX183878	0.992	10212	Bryozoa	Bugula neritina	10212	Bryozoa	Bugula neritina	Intra-species
KC129745	JX183880	0.992	10212	Bryozoa	Bugula neritina	10212	Bryozoa	Bugula neritina	Intra-species
KC129745	JX183883	1.007	10212	Bryozoa	Bugula neritina	10212	Bryozoa	Bugula neritina	Intra-species
KC129745	JX183882	1	10212	Bryozoa	Bugula neritina	10212	Bryozoa	Bugula neritina	Intra-species
KC129745	JX183877	1	10212	Bryozoa	Bugula neritina	10212	Bryozoa	Bugula neritina	Intra-species
KC129746	JX183879	1	10212	Bryozoa	Bugula neritina	10212	Bryozoa	Bugula neritina	Intra-species
KC129746	JX183881	1	10212	Bryozoa	Bugula neritina	10212	Bryozoa	Bugula neritina	Intra-species
KC129746	JX183877	1	10212	Bryozoa	Bugula neritina	10212	Bryozoa	Bugula neritina	Intra-species
KC129746	JX183882	1	10212	Bryozoa	Bugula neritina	10212	Bryozoa	Bugula neritina	Intra-species
KC129746	JX183884	1.016	10212	Bryozoa	Bugula neritina	10212	Bryozoa	Bugula neritina	Intra-species
KC129746	JX183880	0.992	10212	Bryozoa	Bugula neritina	10212	Bryozoa	Bugula neritina	Intra-species
KC129746	JX183883	1.007	10212	Bryozoa	Bugula neritina	10212	Bryozoa	Bugula neritina	Intra-species
KC129746	JX183878	0.992	10212	Bryozoa	Bugula neritina	10212	Bryozoa	Bugula neritina	Intra-species
KC129747	JX183882	0.992	10212	Bryozoa	Bugula neritina	10212	Bryozoa	Bugula neritina	Intra-species
KC129747	JX183881	0.992	10212	Bryozoa	Bugula neritina	10212	Bryozoa	Bugula neritina	Intra-species
KC129747	JX183879	1.007	10212	Bryozoa	Bugula neritina	10212	Bryozoa	Bugula neritina	Intra-species
KC129747	JX183878	1	10212	Bryozoa	Bugula neritina	10212	Bryozoa	Bugula neritina	Intra-species
KC129747	JX183883	1.015	10212	Bryozoa	Bugula neritina	10212	Bryozoa	Bugula neritina	Intra-species
KC129747	JX183877	1.007	10212	Bryozoa	Bugula neritina	10212	Bryozoa	Bugula neritina	Intra-species
KC129747	JX183884	1.016	10212	Bryozoa	Bugula neritina	10212	Bryozoa	Bugula neritina	Intra-species
KC129747	JX183880	1	10212	Bryozoa	Bugula neritina	10212	Bryozoa	Bugula neritina	Intra-species
KC129748	JX183880	0.992	10212	Bryozoa	Bugula neritina	10212	Bryozoa	Bugula neritina	Intra-species
KC129748	JX183878	0.985	10212	Bryozoa	Bugula neritina	10212	Bryozoa	Bugula neritina	Intra-species
KC129748	JX183882	1.023	10212	Bryozoa	Bugula neritina	10212	Bryozoa	Bugula neritina	Intra-species
KC129748	JX183883	1.007	10212	Bryozoa	Bugula neritina	10212	Bryozoa	Bugula neritina	Intra-species
KC129748	JX183879	1	10212	Bryozoa	Bugula neritina	10212	Bryozoa	Bugula neritina	Intra-species
KC129748	JX183877	0.992	10212	Bryozoa	Bugula neritina	10212	Bryozoa	Bugula neritina	Intra-species
KC129748	JX183881	1.023	10212	Bryozoa	Bugula neritina	10212	Bryozoa	Bugula neritina	Intra-species
KC129748	JX183884	0.992	10212	Bryozoa	Bugula neritina	10212	Bryozoa	Bugula neritina	Intra-species
KC129749	JX183879	1.007	10212	Bryozoa	Bugula neritina	10212	Bryozoa	Bugula neritina	Intra-species
KC129749	JX183878	1	10212	Bryozoa	Bugula neritina	10212	Bryozoa	Bugula neritina	Intra-species
KC129749	JX183883	1.015	10212	Bryozoa	Bugula neritina	10212	Bryozoa	Bugula neritina	Intra-species
KC129749	JX183882	0.992	10212	Bryozoa	Bugula neritina	10212	Bryozoa	Bugula neritina	Intra-species
KC129749	JX183880	1	10212	Bryozoa	Bugula neritina	10212	Bryozoa	Bugula neritina	Intra-species
KC129749	JX183881	0.992	10212	Bryozoa	Bugula neritina	10212	Bryozoa	Bugula neritina	Intra-species
KC129749	JX183877	1.007	10212	Bryozoa	Bugula neritina	10212	Bryozoa	Bugula neritina	Intra-species
KC129749	JX183884	1.016	10212	Bryozoa	Bugula neritina	10212	Bryozoa	Bugula neritina	Intra-species
KC129750	JX183879	1.007	10212	Bryozoa	Bugula neritina	10212	Bryozoa	Bugula neritina	Intra-species
KC129750	JX183880	1	10212	Bryozoa	Bugula neritina	10212	Bryozoa	Bugula neritina	Intra-species
KC129750	JX183882	0.992	10212	Bryozoa	Bugula neritina	10212	Bryozoa	Bugula neritina	Intra-species
KC129750	JX183881	0.992	10212	Bryozoa	Bugula neritina	10212	Bryozoa	Bugula neritina	Intra-species
KC129750	JX183883	1.015	10212	Bryozoa	Bugula neritina	10212	Bryozoa	Bugula neritina	Intra-species
KC129750	JX183878	1	10212	Bryozoa	Bugula neritina	10212	Bryozoa	Bugula neritina	Intra-species
KC129750	JX183884	1.016	10212	Bryozoa	Bugula neritina	10212	Bryozoa	Bugula neritina	Intra-species
KC129750	JX183877	1.007	10212	Bryozoa	Bugula neritina	10212	Bryozoa	Bugula neritina	Intra-species
KC129751	JX183883	1.015	10212	Bryozoa	Bugula neritina	10212	Bryozoa	Bugula neritina	Intra-species
KC129751	JX183880	1	10212	Bryozoa	Bugula neritina	10212	Bryozoa	Bugula neritina	Intra-species
KC129751	JX183881	0.992	10212	Bryozoa	Bugula neritina	10212	Bryozoa	Bugula neritina	Intra-species
KC129751	JX183879	1.007	10212	Bryozoa	Bugula neritina	10212	Bryozoa	Bugula neritina	Intra-species
KC129751	JX183877	1.007	10212	Bryozoa	Bugula neritina	10212	Bryozoa	Bugula neritina	Intra-species
KC129751	JX183884	1.016	10212	Bryozoa	Bugula neritina	10212	Bryozoa	Bugula neritina	Intra-species
KC129751	JX183882	0.992	10212	Bryozoa	Bugula neritina	10212	Bryozoa	Bugula neritina	Intra-species
KC129751	JX183878	1	10212	Bryozoa	Bugula neritina	10212	Bryozoa	Bugula neritina	Intra-species
KC129752	JX183878	1	10212	Bryozoa	Bugula neritina	10212	Bryozoa	Bugula neritina	Intra-species
KC129752	JX183880	1	10212	Bryozoa	Bugula neritina	10212	Bryozoa	Bugula neritina	Intra-species
KC129752	JX183879	1.007	10212	Bryozoa	Bugula neritina	10212	Bryozoa	Bugula neritina	Intra-species
KC129752	JX183882	0.992	10212	Bryozoa	Bugula neritina	10212	Bryozoa	Bugula neritina	Intra-species
KC129752	JX183884	1.016	10212	Bryozoa	Bugula neritina	10212	Bryozoa	Bugula neritina	Intra-species
KC129752	JX183877	1.007	10212	Bryozoa	Bugula neritina	10212	Bryozoa	Bugula neritina	Intra-species
KC129752	JX183881	0.992	10212	Bryozoa	Bugula neritina	10212	Bryozoa	Bugula neritina	Intra-species
KC129752	JX183883	1.015	10212	Bryozoa	Bugula neritina	10212	Bryozoa	Bugula neritina	Intra-species
KC129753	JX183881	0.992	10212	Bryozoa	Bugula neritina	10212	Bryozoa	Bugula neritina	Intra-species
KC129753	JX183877	1.007	10212	Bryozoa	Bugula neritina	10212	Bryozoa	Bugula neritina	Intra-species
KC129753	JX183879	1.007	10212	Bryozoa	Bugula neritina	10212	Bryozoa	Bugula neritina	Intra-species
KC129753	JX183883	1.015	10212	Bryozoa	Bugula neritina	10212	Bryozoa	Bugula neritina	Intra-species
KC129753	JX183884	1.016	10212	Bryozoa	Bugula neritina	10212	Bryozoa	Bugula neritina	Intra-species
KC129753	JX183882	0.992	10212	Bryozoa	Bugula neritina	10212	Bryozoa	Bugula neritina	Intra-species
KC129753	JX183878	1	10212	Bryozoa	Bugula neritina	10212	Bryozoa	Bugula neritina	Intra-species
KC129753	JX183880	1	10212	Bryozoa	Bugula neritina	10212	Bryozoa	Bugula neritina	Intra-species
KC129754	JX183883	1.007	10212	Bryozoa	Bugula neritina	10212	Bryozoa	Bugula neritina	Intra-species
KC129754	JX183879	1	10212	Bryozoa	Bugula neritina	10212	Bryozoa	Bugula neritina	Intra-species
KC129754	JX183882	1	10212	Bryozoa	Bugula neritina	10212	Bryozoa	Bugula neritina	Intra-species
KC129754	JX183884	1.016	10212	Bryozoa	Bugula neritina	10212	Bryozoa	Bugula neritina	Intra-species
KC129754	JX183877	1	10212	Bryozoa	Bugula neritina	10212	Bryozoa	Bugula neritina	Intra-species
KC129754	JX183878	0.992	10212	Bryozoa	Bugula neritina	10212	Bryozoa	Bugula neritina	Intra-species
KC129754	JX183881	1	10212	Bryozoa	Bugula neritina	10212	Bryozoa	Bugula neritina	Intra-species
KC129754	JX183880	0.992	10212	Bryozoa	Bugula neritina	10212	Bryozoa	Bugula neritina	Intra-species
KC129755	JX183880	0.992	10212	Bryozoa	Bugula neritina	10212	Bryozoa	Bugula neritina	Intra-species
KC129755	JX183878	0.992	10212	Bryozoa	Bugula neritina	10212	Bryozoa	Bugula neritina	Intra-species
KC129755	JX183877	1	10212	Bryozoa	Bugula neritina	10212	Bryozoa	Bugula neritina	Intra-species
KC129755	JX183882	1	10212	Bryozoa	Bugula neritina	10212	Bryozoa	Bugula neritina	Intra-species
KC129755	JX183879	1	10212	Bryozoa	Bugula neritina	10212	Bryozoa	Bugula neritina	Intra-species
KC129755	JX183884	1.016	10212	Bryozoa	Bugula neritina	10212	Bryozoa	Bugula neritina	Intra-species
KC129755	JX183881	1	10212	Bryozoa	Bugula neritina	10212	Bryozoa	Bugula neritina	Intra-species
KC129755	JX183883	1.007	10212	Bryozoa	Bugula neritina	10212	Bryozoa	Bugula neritina	Intra-species
KC129756	JX183879	1.007	10212	Bryozoa	Bugula neritina	10212	Bryozoa	Bugula neritina	Intra-species
KC129756	JX183878	1	10212	Bryozoa	Bugula neritina	10212	Bryozoa	Bugula neritina	Intra-species
KC129756	JX183884	1.016	10212	Bryozoa	Bugula neritina	10212	Bryozoa	Bugula neritina	Intra-species
KC129756	JX183877	1.007	10212	Bryozoa	Bugula neritina	10212	Bryozoa	Bugula neritina	Intra-species
KC129756	JX183883	1.015	10212	Bryozoa	Bugula neritina	10212	Bryozoa	Bugula neritina	Intra-species
KC129756	JX183882	0.992	10212	Bryozoa	Bugula neritina	10212	Bryozoa	Bugula neritina	Intra-species
KC129756	JX183881	0.992	10212	Bryozoa	Bugula neritina	10212	Bryozoa	Bugula neritina	Intra-species
KC129756	JX183880	1	10212	Bryozoa	Bugula neritina	10212	Bryozoa	Bugula neritina	Intra-species
KC129757	JX183878	1	10212	Bryozoa	Bugula neritina	10212	Bryozoa	Bugula neritina	Intra-species
KC129757	JX183880	1	10212	Bryozoa	Bugula neritina	10212	Bryozoa	Bugula neritina	Intra-species
KC129757	JX183883	1.015	10212	Bryozoa	Bugula neritina	10212	Bryozoa	Bugula neritina	Intra-species
KC129757	JX183877	1.007	10212	Bryozoa	Bugula neritina	10212	Bryozoa	Bugula neritina	Intra-species
KC129757	JX183882	0.992	10212	Bryozoa	Bugula neritina	10212	Bryozoa	Bugula neritina	Intra-species
KC129757	JX183884	1.016	10212	Bryozoa	Bugula neritina	10212	Bryozoa	Bugula neritina	Intra-species
KC129757	JX183879	1.007	10212	Bryozoa	Bugula neritina	10212	Bryozoa	Bugula neritina	Intra-species
KC129757	JX183881	0.992	10212	Bryozoa	Bugula neritina	10212	Bryozoa	Bugula neritina	Intra-species
KC129758	JX183883	1.015	10212	Bryozoa	Bugula neritina	10212	Bryozoa	Bugula neritina	Intra-species
KC129758	JX183880	1	10212	Bryozoa	Bugula neritina	10212	Bryozoa	Bugula neritina	Intra-species
KC129758	JX183884	1.016	10212	Bryozoa	Bugula neritina	10212	Bryozoa	Bugula neritina	Intra-species
KC129758	JX183882	0.992	10212	Bryozoa	Bugula neritina	10212	Bryozoa	Bugula neritina	Intra-species
KC129758	JX183878	1	10212	Bryozoa	Bugula neritina	10212	Bryozoa	Bugula neritina	Intra-species
KC129758	JX183877	1.007	10212	Bryozoa	Bugula neritina	10212	Bryozoa	Bugula neritina	Intra-species
KC129758	JX183881	0.992	10212	Bryozoa	Bugula neritina	10212	Bryozoa	Bugula neritina	Intra-species
KC129758	JX183879	1.007	10212	Bryozoa	Bugula neritina	10212	Bryozoa	Bugula neritina	Intra-species
KC129759	JX183882	1.007	10212	Bryozoa	Bugula neritina	10212	Bryozoa	Bugula neritina	Intra-species
KC129759	JX183881	1.007	10212	Bryozoa	Bugula neritina	10212	Bryozoa	Bugula neritina	Intra-species
KC129759	JX183883	1.033	10212	Bryozoa	Bugula neritina	10212	Bryozoa	Bugula neritina	Intra-species
KC129759	JX183884	1.033	10212	Bryozoa	Bugula neritina	10212	Bryozoa	Bugula neritina	Intra-species
KC129759	JX183878	1.015	10212	Bryozoa	Bugula neritina	10212	Bryozoa	Bugula neritina	Intra-species
KC129759	JX183877	1.024	10212	Bryozoa	Bugula neritina	10212	Bryozoa	Bugula neritina	Intra-species
KC129759	JX183880	1.015	10212	Bryozoa	Bugula neritina	10212	Bryozoa	Bugula neritina	Intra-species
KC129759	JX183879	1.024	10212	Bryozoa	Bugula neritina	10212	Bryozoa	Bugula neritina	Intra-species
KC129760	JX183884	1.033	10212	Bryozoa	Bugula neritina	10212	Bryozoa	Bugula neritina	Intra-species
KC129760	JX183881	1.007	10212	Bryozoa	Bugula neritina	10212	Bryozoa	Bugula neritina	Intra-species
KC129760	JX183877	1.024	10212	Bryozoa	Bugula neritina	10212	Bryozoa	Bugula neritina	Intra-species
KC129760	JX183880	1.015	10212	Bryozoa	Bugula neritina	10212	Bryozoa	Bugula neritina	Intra-species
KC129760	JX183878	1.015	10212	Bryozoa	Bugula neritina	10212	Bryozoa	Bugula neritina	Intra-species
KC129760	JX183882	1.007	10212	Bryozoa	Bugula neritina	10212	Bryozoa	Bugula neritina	Intra-species
KC129760	JX183883	1.033	10212	Bryozoa	Bugula neritina	10212	Bryozoa	Bugula neritina	Intra-species
KC129760	JX183879	1.024	10212	Bryozoa	Bugula neritina	10212	Bryozoa	Bugula neritina	Intra-species
KC129761	JX183880	1.005	10212	Bryozoa	Bugula neritina	10212	Bryozoa	Bugula neritina	Intra-species
KC129761	JX183883	1.024	10212	Bryozoa	Bugula neritina	10212	Bryozoa	Bugula neritina	Intra-species
KC129761	JX183881	0.996	10212	Bryozoa	Bugula neritina	10212	Bryozoa	Bugula neritina	Intra-species
KC129761	JX183882	0.996	10212	Bryozoa	Bugula neritina	10212	Bryozoa	Bugula neritina	Intra-species
KC129761	JX183879	1.014	10212	Bryozoa	Bugula neritina	10212	Bryozoa	Bugula neritina	Intra-species
KC129761	JX183878	1.005	10212	Bryozoa	Bugula neritina	10212	Bryozoa	Bugula neritina	Intra-species
KC129761	JX183877	1.014	10212	Bryozoa	Bugula neritina	10212	Bryozoa	Bugula neritina	Intra-species
KC129761	JX183884	1.024	10212	Bryozoa	Bugula neritina	10212	Bryozoa	Bugula neritina	Intra-species
KC129762	JX183883	1.033	10212	Bryozoa	Bugula neritina	10212	Bryozoa	Bugula neritina	Intra-species
KC129762	JX183879	1.024	10212	Bryozoa	Bugula neritina	10212	Bryozoa	Bugula neritina	Intra-species
KC129762	JX183881	1.007	10212	Bryozoa	Bugula neritina	10212	Bryozoa	Bugula neritina	Intra-species
KC129762	JX183884	1.033	10212	Bryozoa	Bugula neritina	10212	Bryozoa	Bugula neritina	Intra-species
KC129762	JX183877	1.024	10212	Bryozoa	Bugula neritina	10212	Bryozoa	Bugula neritina	Intra-species
KC129762	JX183882	1.007	10212	Bryozoa	Bugula neritina	10212	Bryozoa	Bugula neritina	Intra-species
KC129762	JX183880	1.015	10212	Bryozoa	Bugula neritina	10212	Bryozoa	Bugula neritina	Intra-species
KC129762	JX183878	1.015	10212	Bryozoa	Bugula neritina	10212	Bryozoa	Bugula neritina	Intra-species
KC129763	JX183882	0.992	10212	Bryozoa	Bugula neritina	10212	Bryozoa	Bugula neritina	Intra-species
KC129763	JX183879	1.007	10212	Bryozoa	Bugula neritina	10212	Bryozoa	Bugula neritina	Intra-species
KC129763	JX183878	1	10212	Bryozoa	Bugula neritina	10212	Bryozoa	Bugula neritina	Intra-species
KC129763	JX183884	1.016	10212	Bryozoa	Bugula neritina	10212	Bryozoa	Bugula neritina	Intra-species
KC129763	JX183881	0.992	10212	Bryozoa	Bugula neritina	10212	Bryozoa	Bugula neritina	Intra-species
KC129763	JX183883	1.015	10212	Bryozoa	Bugula neritina	10212	Bryozoa	Bugula neritina	Intra-species
KC129763	JX183877	1.007	10212	Bryozoa	Bugula neritina	10212	Bryozoa	Bugula neritina	Intra-species
KC129763	JX183880	1	10212	Bryozoa	Bugula neritina	10212	Bryozoa	Bugula neritina	Intra-species
KC129764	JX183877	1	10212	Bryozoa	Bugula neritina	10212	Bryozoa	Bugula neritina	Intra-species
KC129764	JX183880	0.992	10212	Bryozoa	Bugula neritina	10212	Bryozoa	Bugula neritina	Intra-species
KC129764	JX183879	1	10212	Bryozoa	Bugula neritina	10212	Bryozoa	Bugula neritina	Intra-species
KC129764	JX183882	1	10212	Bryozoa	Bugula neritina	10212	Bryozoa	Bugula neritina	Intra-species
KC129764	JX183881	1	10212	Bryozoa	Bugula neritina	10212	Bryozoa	Bugula neritina	Intra-species
KC129764	JX183883	1.007	10212	Bryozoa	Bugula neritina	10212	Bryozoa	Bugula neritina	Intra-species
KC129764	JX183878	0.992	10212	Bryozoa	Bugula neritina	10212	Bryozoa	Bugula neritina	Intra-species
KC129764	JX183884	1.016	10212	Bryozoa	Bugula neritina	10212	Bryozoa	Bugula neritina	Intra-species
KC129765	JX183878	1.015	10212	Bryozoa	Bugula neritina	10212	Bryozoa	Bugula neritina	Intra-species
KC129765	JX183883	1.033	10212	Bryozoa	Bugula neritina	10212	Bryozoa	Bugula neritina	Intra-species
KC129765	JX183881	1.007	10212	Bryozoa	Bugula neritina	10212	Bryozoa	Bugula neritina	Intra-species
KC129765	JX183877	1.024	10212	Bryozoa	Bugula neritina	10212	Bryozoa	Bugula neritina	Intra-species
KC129765	JX183882	1.007	10212	Bryozoa	Bugula neritina	10212	Bryozoa	Bugula neritina	Intra-species
KC129765	JX183879	1.024	10212	Bryozoa	Bugula neritina	10212	Bryozoa	Bugula neritina	Intra-species
KC129765	JX183880	1.015	10212	Bryozoa	Bugula neritina	10212	Bryozoa	Bugula neritina	Intra-species
KC129765	JX183884	1.033	10212	Bryozoa	Bugula neritina	10212	Bryozoa	Bugula neritina	Intra-species
KC129766	JX183882	0.992	10212	Bryozoa	Bugula neritina	10212	Bryozoa	Bugula neritina	Intra-species
KC129766	JX183877	1.007	10212	Bryozoa	Bugula neritina	10212	Bryozoa	Bugula neritina	Intra-species
KC129766	JX183883	1.015	10212	Bryozoa	Bugula neritina	10212	Bryozoa	Bugula neritina	Intra-species
KC129766	JX183878	1	10212	Bryozoa	Bugula neritina	10212	Bryozoa	Bugula neritina	Intra-species
KC129766	JX183881	0.992	10212	Bryozoa	Bugula neritina	10212	Bryozoa	Bugula neritina	Intra-species
KC129766	JX183884	1.016	10212	Bryozoa	Bugula neritina	10212	Bryozoa	Bugula neritina	Intra-species
KC129766	JX183880	1	10212	Bryozoa	Bugula neritina	10212	Bryozoa	Bugula neritina	Intra-species
KC129766	JX183879	1.007	10212	Bryozoa	Bugula neritina	10212	Bryozoa	Bugula neritina	Intra-species
KC129767	JX183883	1.007	10212	Bryozoa	Bugula neritina	10212	Bryozoa	Bugula neritina	Intra-species
KC129767	JX183881	1	10212	Bryozoa	Bugula neritina	10212	Bryozoa	Bugula neritina	Intra-species
KC129767	JX183879	1	10212	Bryozoa	Bugula neritina	10212	Bryozoa	Bugula neritina	Intra-species
KC129767	JX183878	0.992	10212	Bryozoa	Bugula neritina	10212	Bryozoa	Bugula neritina	Intra-species
KC129767	JX183884	1.016	10212	Bryozoa	Bugula neritina	10212	Bryozoa	Bugula neritina	Intra-species
KC129767	JX183877	1	10212	Bryozoa	Bugula neritina	10212	Bryozoa	Bugula neritina	Intra-species
KC129767	JX183880	0.992	10212	Bryozoa	Bugula neritina	10212	Bryozoa	Bugula neritina	Intra-species
KC129767	JX183882	1	10212	Bryozoa	Bugula neritina	10212	Bryozoa	Bugula neritina	Intra-species
KC129768	JX183880	0.992	10212	Bryozoa	Bugula neritina	10212	Bryozoa	Bugula neritina	Intra-species
KC129768	JX183882	1	10212	Bryozoa	Bugula neritina	10212	Bryozoa	Bugula neritina	Intra-species
KC129768	JX183877	1	10212	Bryozoa	Bugula neritina	10212	Bryozoa	Bugula neritina	Intra-species
KC129768	JX183878	0.992	10212	Bryozoa	Bugula neritina	10212	Bryozoa	Bugula neritina	Intra-species
KC129768	JX183884	1.016	10212	Bryozoa	Bugula neritina	10212	Bryozoa	Bugula neritina	Intra-species
KC129768	JX183881	1	10212	Bryozoa	Bugula neritina	10212	Bryozoa	Bugula neritina	Intra-species
KC129768	JX183883	1.007	10212	Bryozoa	Bugula neritina	10212	Bryozoa	Bugula neritina	Intra-species
KC129768	JX183879	1	10212	Bryozoa	Bugula neritina	10212	Bryozoa	Bugula neritina	Intra-species
KC129769	JX183877	1	10212	Bryozoa	Bugula neritina	10212	Bryozoa	Bugula neritina	Intra-species
KC129769	JX183878	0.992	10212	Bryozoa	Bugula neritina	10212	Bryozoa	Bugula neritina	Intra-species
KC129769	JX183879	1	10212	Bryozoa	Bugula neritina	10212	Bryozoa	Bugula neritina	Intra-species
KC129769	JX183883	1.007	10212	Bryozoa	Bugula neritina	10212	Bryozoa	Bugula neritina	Intra-species
KC129769	JX183884	1.016	10212	Bryozoa	Bugula neritina	10212	Bryozoa	Bugula neritina	Intra-species
KC129769	JX183882	1	10212	Bryozoa	Bugula neritina	10212	Bryozoa	Bugula neritina	Intra-species
KC129769	JX183880	0.992	10212	Bryozoa	Bugula neritina	10212	Bryozoa	Bugula neritina	Intra-species
KC129769	JX183881	1	10212	Bryozoa	Bugula neritina	10212	Bryozoa	Bugula neritina	Intra-species
KC129770	JX183883	1.007	10212	Bryozoa	Bugula neritina	10212	Bryozoa	Bugula neritina	Intra-species
KC129770	JX183884	1.016	10212	Bryozoa	Bugula neritina	10212	Bryozoa	Bugula neritina	Intra-species
KC129770	JX183880	0.992	10212	Bryozoa	Bugula neritina	10212	Bryozoa	Bugula neritina	Intra-species
KC129770	JX183879	1	10212	Bryozoa	Bugula neritina	10212	Bryozoa	Bugula neritina	Intra-species
KC129770	JX183878	0.992	10212	Bryozoa	Bugula neritina	10212	Bryozoa	Bugula neritina	Intra-species
KC129770	JX183877	1	10212	Bryozoa	Bugula neritina	10212	Bryozoa	Bugula neritina	Intra-species
KC129770	JX183881	1	10212	Bryozoa	Bugula neritina	10212	Bryozoa	Bugula neritina	Intra-species
KC129770	JX183882	1	10212	Bryozoa	Bugula neritina	10212	Bryozoa	Bugula neritina	Intra-species
KC129771	JX183880	0.992	10212	Bryozoa	Bugula neritina	10212	Bryozoa	Bugula neritina	Intra-species
KC129771	JX183879	1	10212	Bryozoa	Bugula neritina	10212	Bryozoa	Bugula neritina	Intra-species
KC129771	JX183878	0.992	10212	Bryozoa	Bugula neritina	10212	Bryozoa	Bugula neritina	Intra-species
KC129771	JX183881	1	10212	Bryozoa	Bugula neritina	10212	Bryozoa	Bugula neritina	Intra-species
KC129771	JX183877	1	10212	Bryozoa	Bugula neritina	10212	Bryozoa	Bugula neritina	Intra-species
KC129771	JX183883	1.007	10212	Bryozoa	Bugula neritina	10212	Bryozoa	Bugula neritina	Intra-species
KC129771	JX183884	1.016	10212	Bryozoa	Bugula neritina	10212	Bryozoa	Bugula neritina	Intra-species
KC129771	JX183882	1	10212	Bryozoa	Bugula neritina	10212	Bryozoa	Bugula neritina	Intra-species
KC129772	JX183882	1	10212	Bryozoa	Bugula neritina	10212	Bryozoa	Bugula neritina	Intra-species
KC129772	JX183877	1	10212	Bryozoa	Bugula neritina	10212	Bryozoa	Bugula neritina	Intra-species
KC129772	JX183881	1	10212	Bryozoa	Bugula neritina	10212	Bryozoa	Bugula neritina	Intra-species
KC129772	JX183884	1.016	10212	Bryozoa	Bugula neritina	10212	Bryozoa	Bugula neritina	Intra-species
KC129772	JX183878	0.992	10212	Bryozoa	Bugula neritina	10212	Bryozoa	Bugula neritina	Intra-species
KC129772	JX183880	0.992	10212	Bryozoa	Bugula neritina	10212	Bryozoa	Bugula neritina	Intra-species
KC129772	JX183883	1.007	10212	Bryozoa	Bugula neritina	10212	Bryozoa	Bugula neritina	Intra-species
KC129772	JX183879	1	10212	Bryozoa	Bugula neritina	10212	Bryozoa	Bugula neritina	Intra-species
KC129773	JX183879	1.024	10212	Bryozoa	Bugula neritina	10212	Bryozoa	Bugula neritina	Intra-species
KC129773	JX183882	1.007	10212	Bryozoa	Bugula neritina	10212	Bryozoa	Bugula neritina	Intra-species
KC129773	JX183880	1.015	10212	Bryozoa	Bugula neritina	10212	Bryozoa	Bugula neritina	Intra-species
KC129773	JX183878	1.015	10212	Bryozoa	Bugula neritina	10212	Bryozoa	Bugula neritina	Intra-species
KC129773	JX183877	1.024	10212	Bryozoa	Bugula neritina	10212	Bryozoa	Bugula neritina	Intra-species
KC129773	JX183881	1.007	10212	Bryozoa	Bugula neritina	10212	Bryozoa	Bugula neritina	Intra-species
KC129773	JX183883	1.033	10212	Bryozoa	Bugula neritina	10212	Bryozoa	Bugula neritina	Intra-species
KC129773	JX183884	1.033	10212	Bryozoa	Bugula neritina	10212	Bryozoa	Bugula neritina	Intra-species
KC129774	JX183879	1	10212	Bryozoa	Bugula neritina	10212	Bryozoa	Bugula neritina	Intra-species
KC129774	JX183882	1	10212	Bryozoa	Bugula neritina	10212	Bryozoa	Bugula neritina	Intra-species
KC129774	JX183878	0.992	10212	Bryozoa	Bugula neritina	10212	Bryozoa	Bugula neritina	Intra-species
KC129774	JX183877	1	10212	Bryozoa	Bugula neritina	10212	Bryozoa	Bugula neritina	Intra-species
KC129774	JX183881	1	10212	Bryozoa	Bugula neritina	10212	Bryozoa	Bugula neritina	Intra-species
KC129774	JX183883	1.007	10212	Bryozoa	Bugula neritina	10212	Bryozoa	Bugula neritina	Intra-species
KC129774	JX183884	1.016	10212	Bryozoa	Bugula neritina	10212	Bryozoa	Bugula neritina	Intra-species
KC129774	JX183880	0.992	10212	Bryozoa	Bugula neritina	10212	Bryozoa	Bugula neritina	Intra-species
KC129775	JX183877	1.024	10212	Bryozoa	Bugula neritina	10212	Bryozoa	Bugula neritina	Intra-species
KC129775	JX183882	1.007	10212	Bryozoa	Bugula neritina	10212	Bryozoa	Bugula neritina	Intra-species
KC129775	JX183880	1.015	10212	Bryozoa	Bugula neritina	10212	Bryozoa	Bugula neritina	Intra-species
KC129775	JX183879	1.024	10212	Bryozoa	Bugula neritina	10212	Bryozoa	Bugula neritina	Intra-species
KC129775	JX183884	1.033	10212	Bryozoa	Bugula neritina	10212	Bryozoa	Bugula neritina	Intra-species
KC129775	JX183883	1.033	10212	Bryozoa	Bugula neritina	10212	Bryozoa	Bugula neritina	Intra-species
KC129775	JX183881	1.007	10212	Bryozoa	Bugula neritina	10212	Bryozoa	Bugula neritina	Intra-species
KC129775	JX183878	1.015	10212	Bryozoa	Bugula neritina	10212	Bryozoa	Bugula neritina	Intra-species
KC129776	JX183880	0.994	10212	Bryozoa	Bugula neritina	10212	Bryozoa	Bugula neritina	Intra-species
KC129776	JX183881	1.002	10212	Bryozoa	Bugula neritina	10212	Bryozoa	Bugula neritina	Intra-species
KC129776	JX183882	1.002	10212	Bryozoa	Bugula neritina	10212	Bryozoa	Bugula neritina	Intra-species
KC129776	JX183883	1.01	10212	Bryozoa	Bugula neritina	10212	Bryozoa	Bugula neritina	Intra-species
KC129776	JX183877	1.002	10212	Bryozoa	Bugula neritina	10212	Bryozoa	Bugula neritina	Intra-species
KC129776	JX183878	0.994	10212	Bryozoa	Bugula neritina	10212	Bryozoa	Bugula neritina	Intra-species
KC129776	JX183884	1.016	10212	Bryozoa	Bugula neritina	10212	Bryozoa	Bugula neritina	Intra-species
KC129776	JX183879	1.002	10212	Bryozoa	Bugula neritina	10212	Bryozoa	Bugula neritina	Intra-species
KC129777	JX183878	0.992	10212	Bryozoa	Bugula neritina	10212	Bryozoa	Bugula neritina	Intra-species
KC129777	JX183884	1.016	10212	Bryozoa	Bugula neritina	10212	Bryozoa	Bugula neritina	Intra-species
KC129777	JX183877	1	10212	Bryozoa	Bugula neritina	10212	Bryozoa	Bugula neritina	Intra-species
KC129777	JX183880	0.992	10212	Bryozoa	Bugula neritina	10212	Bryozoa	Bugula neritina	Intra-species
KC129777	JX183879	1	10212	Bryozoa	Bugula neritina	10212	Bryozoa	Bugula neritina	Intra-species
KC129777	JX183882	1	10212	Bryozoa	Bugula neritina	10212	Bryozoa	Bugula neritina	Intra-species
KC129777	JX183881	1	10212	Bryozoa	Bugula neritina	10212	Bryozoa	Bugula neritina	Intra-species
KC129777	JX183883	1.007	10212	Bryozoa	Bugula neritina	10212	Bryozoa	Bugula neritina	Intra-species
KC129778	JX183878	1.015	10212	Bryozoa	Bugula neritina	10212	Bryozoa	Bugula neritina	Intra-species
KC129778	JX183883	1.033	10212	Bryozoa	Bugula neritina	10212	Bryozoa	Bugula neritina	Intra-species
KC129778	JX183884	1.033	10212	Bryozoa	Bugula neritina	10212	Bryozoa	Bugula neritina	Intra-species
KC129778	JX183881	1.007	10212	Bryozoa	Bugula neritina	10212	Bryozoa	Bugula neritina	Intra-species
KC129778	JX183882	1.007	10212	Bryozoa	Bugula neritina	10212	Bryozoa	Bugula neritina	Intra-species
KC129778	JX183877	1.024	10212	Bryozoa	Bugula neritina	10212	Bryozoa	Bugula neritina	Intra-species
KC129778	JX183879	1.024	10212	Bryozoa	Bugula neritina	10212	Bryozoa	Bugula neritina	Intra-species
KC129778	JX183880	1.015	10212	Bryozoa	Bugula neritina	10212	Bryozoa	Bugula neritina	Intra-species
KC129779	JX183882	0.992	10212	Bryozoa	Bugula neritina	10212	Bryozoa	Bugula neritina	Intra-species
KC129779	JX183878	1	10212	Bryozoa	Bugula neritina	10212	Bryozoa	Bugula neritina	Intra-species
KC129779	JX183880	1	10212	Bryozoa	Bugula neritina	10212	Bryozoa	Bugula neritina	Intra-species
KC129779	JX183881	0.992	10212	Bryozoa	Bugula neritina	10212	Bryozoa	Bugula neritina	Intra-species
KC129779	JX183877	1.007	10212	Bryozoa	Bugula neritina	10212	Bryozoa	Bugula neritina	Intra-species
KC129779	JX183884	1.016	10212	Bryozoa	Bugula neritina	10212	Bryozoa	Bugula neritina	Intra-species
KC129779	JX183879	1.007	10212	Bryozoa	Bugula neritina	10212	Bryozoa	Bugula neritina	Intra-species
KC129779	JX183883	1.015	10212	Bryozoa	Bugula neritina	10212	Bryozoa	Bugula neritina	Intra-species
KC129780	JX183881	1	10212	Bryozoa	Bugula neritina	10212	Bryozoa	Bugula neritina	Intra-species
KC129780	JX183884	1.016	10212	Bryozoa	Bugula neritina	10212	Bryozoa	Bugula neritina	Intra-species
KC129780	JX183882	1	10212	Bryozoa	Bugula neritina	10212	Bryozoa	Bugula neritina	Intra-species
KC129780	JX183879	1	10212	Bryozoa	Bugula neritina	10212	Bryozoa	Bugula neritina	Intra-species
KC129780	JX183880	0.992	10212	Bryozoa	Bugula neritina	10212	Bryozoa	Bugula neritina	Intra-species
KC129780	JX183878	0.992	10212	Bryozoa	Bugula neritina	10212	Bryozoa	Bugula neritina	Intra-species
KC129780	JX183877	1	10212	Bryozoa	Bugula neritina	10212	Bryozoa	Bugula neritina	Intra-species
KC129780	JX183883	1.007	10212	Bryozoa	Bugula neritina	10212	Bryozoa	Bugula neritina	Intra-species
KC129781	JX183879	1	10212	Bryozoa	Bugula neritina	10212	Bryozoa	Bugula neritina	Intra-species
KC129781	JX183878	0.992	10212	Bryozoa	Bugula neritina	10212	Bryozoa	Bugula neritina	Intra-species
KC129781	JX183881	1	10212	Bryozoa	Bugula neritina	10212	Bryozoa	Bugula neritina	Intra-species
KC129781	JX183883	1.007	10212	Bryozoa	Bugula neritina	10212	Bryozoa	Bugula neritina	Intra-species
KC129781	JX183880	0.992	10212	Bryozoa	Bugula neritina	10212	Bryozoa	Bugula neritina	Intra-species
KC129781	JX183877	1	10212	Bryozoa	Bugula neritina	10212	Bryozoa	Bugula neritina	Intra-species
KC129781	JX183882	1	10212	Bryozoa	Bugula neritina	10212	Bryozoa	Bugula neritina	Intra-species
KC129781	JX183884	1.016	10212	Bryozoa	Bugula neritina	10212	Bryozoa	Bugula neritina	Intra-species
KC129782	JX183883	1.007	10212	Bryozoa	Bugula neritina	10212	Bryozoa	Bugula neritina	Intra-species
KC129782	JX183882	1	10212	Bryozoa	Bugula neritina	10212	Bryozoa	Bugula neritina	Intra-species
KC129782	JX183881	1	10212	Bryozoa	Bugula neritina	10212	Bryozoa	Bugula neritina	Intra-species
KC129782	JX183879	1	10212	Bryozoa	Bugula neritina	10212	Bryozoa	Bugula neritina	Intra-species
KC129782	JX183880	0.992	10212	Bryozoa	Bugula neritina	10212	Bryozoa	Bugula neritina	Intra-species
KC129782	JX183877	1	10212	Bryozoa	Bugula neritina	10212	Bryozoa	Bugula neritina	Intra-species
KC129782	JX183878	0.992	10212	Bryozoa	Bugula neritina	10212	Bryozoa	Bugula neritina	Intra-species
KC129782	JX183884	1.016	10212	Bryozoa	Bugula neritina	10212	Bryozoa	Bugula neritina	Intra-species
KC129783	JX183877	1	10212	Bryozoa	Bugula neritina	10212	Bryozoa	Bugula neritina	Intra-species
KC129783	JX183881	1	10212	Bryozoa	Bugula neritina	10212	Bryozoa	Bugula neritina	Intra-species
KC129783	JX183879	1	10212	Bryozoa	Bugula neritina	10212	Bryozoa	Bugula neritina	Intra-species
KC129783	JX183878	0.992	10212	Bryozoa	Bugula neritina	10212	Bryozoa	Bugula neritina	Intra-species
KC129783	JX183880	0.992	10212	Bryozoa	Bugula neritina	10212	Bryozoa	Bugula neritina	Intra-species
KC129783	JX183884	1.016	10212	Bryozoa	Bugula neritina	10212	Bryozoa	Bugula neritina	Intra-species
KC129783	JX183882	1	10212	Bryozoa	Bugula neritina	10212	Bryozoa	Bugula neritina	Intra-species
KC129783	JX183883	1.007	10212	Bryozoa	Bugula neritina	10212	Bryozoa	Bugula neritina	Intra-species
KC129784	JX183884	1.016	10212	Bryozoa	Bugula neritina	10212	Bryozoa	Bugula neritina	Intra-species
KC129784	JX183878	0.992	10212	Bryozoa	Bugula neritina	10212	Bryozoa	Bugula neritina	Intra-species
KC129784	JX183877	1	10212	Bryozoa	Bugula neritina	10212	Bryozoa	Bugula neritina	Intra-species
KC129784	JX183883	1.007	10212	Bryozoa	Bugula neritina	10212	Bryozoa	Bugula neritina	Intra-species
KC129784	JX183882	1	10212	Bryozoa	Bugula neritina	10212	Bryozoa	Bugula neritina	Intra-species
KC129784	JX183880	0.992	10212	Bryozoa	Bugula neritina	10212	Bryozoa	Bugula neritina	Intra-species
KC129784	JX183879	1	10212	Bryozoa	Bugula neritina	10212	Bryozoa	Bugula neritina	Intra-species
KC129784	JX183881	1	10212	Bryozoa	Bugula neritina	10212	Bryozoa	Bugula neritina	Intra-species
KC129785	JX183878	0.992	10212	Bryozoa	Bugula neritina	10212	Bryozoa	Bugula neritina	Intra-species
KC129785	JX183880	0.992	10212	Bryozoa	Bugula neritina	10212	Bryozoa	Bugula neritina	Intra-species
KC129785	JX183881	1	10212	Bryozoa	Bugula neritina	10212	Bryozoa	Bugula neritina	Intra-species
KC129785	JX183883	1.007	10212	Bryozoa	Bugula neritina	10212	Bryozoa	Bugula neritina	Intra-species
KC129785	JX183879	1	10212	Bryozoa	Bugula neritina	10212	Bryozoa	Bugula neritina	Intra-species
KC129785	JX183884	1.016	10212	Bryozoa	Bugula neritina	10212	Bryozoa	Bugula neritina	Intra-species
KC129785	JX183877	1	10212	Bryozoa	Bugula neritina	10212	Bryozoa	Bugula neritina	Intra-species
KC129785	JX183882	1	10212	Bryozoa	Bugula neritina	10212	Bryozoa	Bugula neritina	Intra-species
KC129786	JX183880	1.015	10212	Bryozoa	Bugula neritina	10212	Bryozoa	Bugula neritina	Intra-species
KC129786	JX183878	1.015	10212	Bryozoa	Bugula neritina	10212	Bryozoa	Bugula neritina	Intra-species
KC129786	JX183883	1.033	10212	Bryozoa	Bugula neritina	10212	Bryozoa	Bugula neritina	Intra-species
KC129786	JX183884	1.033	10212	Bryozoa	Bugula neritina	10212	Bryozoa	Bugula neritina	Intra-species
KC129786	JX183882	1.007	10212	Bryozoa	Bugula neritina	10212	Bryozoa	Bugula neritina	Intra-species
KC129786	JX183879	1.024	10212	Bryozoa	Bugula neritina	10212	Bryozoa	Bugula neritina	Intra-species
KC129786	JX183881	1.007	10212	Bryozoa	Bugula neritina	10212	Bryozoa	Bugula neritina	Intra-species
KC129786	JX183877	1.024	10212	Bryozoa	Bugula neritina	10212	Bryozoa	Bugula neritina	Intra-species
KC129787	JX183884	1.016	10212	Bryozoa	Bugula neritina	10212	Bryozoa	Bugula neritina	Intra-species
KC129787	JX183877	1	10212	Bryozoa	Bugula neritina	10212	Bryozoa	Bugula neritina	Intra-species
KC129787	JX183878	0.992	10212	Bryozoa	Bugula neritina	10212	Bryozoa	Bugula neritina	Intra-species
KC129787	JX183883	1.007	10212	Bryozoa	Bugula neritina	10212	Bryozoa	Bugula neritina	Intra-species
KC129787	JX183881	1	10212	Bryozoa	Bugula neritina	10212	Bryozoa	Bugula neritina	Intra-species
KC129787	JX183880	0.992	10212	Bryozoa	Bugula neritina	10212	Bryozoa	Bugula neritina	Intra-species
KC129787	JX183882	1	10212	Bryozoa	Bugula neritina	10212	Bryozoa	Bugula neritina	Intra-species
KC129787	JX183879	1	10212	Bryozoa	Bugula neritina	10212	Bryozoa	Bugula neritina	Intra-species
KC129788	JX183880	0.992	10212	Bryozoa	Bugula neritina	10212	Bryozoa	Bugula neritina	Intra-species
KC129788	JX183882	1	10212	Bryozoa	Bugula neritina	10212	Bryozoa	Bugula neritina	Intra-species
KC129788	JX183877	1	10212	Bryozoa	Bugula neritina	10212	Bryozoa	Bugula neritina	Intra-species
KC129788	JX183884	1.016	10212	Bryozoa	Bugula neritina	10212	Bryozoa	Bugula neritina	Intra-species
KC129788	JX183883	1.007	10212	Bryozoa	Bugula neritina	10212	Bryozoa	Bugula neritina	Intra-species
KC129788	JX183881	1	10212	Bryozoa	Bugula neritina	10212	Bryozoa	Bugula neritina	Intra-species
KC129788	JX183878	0.992	10212	Bryozoa	Bugula neritina	10212	Bryozoa	Bugula neritina	Intra-species
KC129788	JX183879	1	10212	Bryozoa	Bugula neritina	10212	Bryozoa	Bugula neritina	Intra-species
KC129789	JX183880	0.992	10212	Bryozoa	Bugula neritina	10212	Bryozoa	Bugula neritina	Intra-species
KC129789	JX183877	1	10212	Bryozoa	Bugula neritina	10212	Bryozoa	Bugula neritina	Intra-species
KC129789	JX183884	1.016	10212	Bryozoa	Bugula neritina	10212	Bryozoa	Bugula neritina	Intra-species
KC129789	JX183882	1	10212	Bryozoa	Bugula neritina	10212	Bryozoa	Bugula neritina	Intra-species
KC129789	JX183881	1	10212	Bryozoa	Bugula neritina	10212	Bryozoa	Bugula neritina	Intra-species
KC129789	JX183878	0.992	10212	Bryozoa	Bugula neritina	10212	Bryozoa	Bugula neritina	Intra-species
KC129789	JX183883	1.007	10212	Bryozoa	Bugula neritina	10212	Bryozoa	Bugula neritina	Intra-species
KC129789	JX183879	1	10212	Bryozoa	Bugula neritina	10212	Bryozoa	Bugula neritina	Intra-species
KC129790	JX183881	1.001	10212	Bryozoa	Bugula neritina	10212	Bryozoa	Bugula neritina	Intra-species
KC129790	JX183878	0.994	10212	Bryozoa	Bugula neritina	10212	Bryozoa	Bugula neritina	Intra-species
KC129790	JX183877	1.001	10212	Bryozoa	Bugula neritina	10212	Bryozoa	Bugula neritina	Intra-species
KC129790	JX183879	1.001	10212	Bryozoa	Bugula neritina	10212	Bryozoa	Bugula neritina	Intra-species
KC129790	JX183884	1.016	10212	Bryozoa	Bugula neritina	10212	Bryozoa	Bugula neritina	Intra-species
KC129790	JX183880	0.994	10212	Bryozoa	Bugula neritina	10212	Bryozoa	Bugula neritina	Intra-species
KC129790	JX183882	1.001	10212	Bryozoa	Bugula neritina	10212	Bryozoa	Bugula neritina	Intra-species
KC129790	JX183883	1.009	10212	Bryozoa	Bugula neritina	10212	Bryozoa	Bugula neritina	Intra-species
KC129791	JX183880	0.992	10212	Bryozoa	Bugula neritina	10212	Bryozoa	Bugula neritina	Intra-species
KC129791	JX183878	0.992	10212	Bryozoa	Bugula neritina	10212	Bryozoa	Bugula neritina	Intra-species
KC129791	JX183884	1.016	10212	Bryozoa	Bugula neritina	10212	Bryozoa	Bugula neritina	Intra-species
KC129791	JX183883	1.007	10212	Bryozoa	Bugula neritina	10212	Bryozoa	Bugula neritina	Intra-species
KC129791	JX183881	1	10212	Bryozoa	Bugula neritina	10212	Bryozoa	Bugula neritina	Intra-species
KC129791	JX183882	1	10212	Bryozoa	Bugula neritina	10212	Bryozoa	Bugula neritina	Intra-species
KC129791	JX183879	1	10212	Bryozoa	Bugula neritina	10212	Bryozoa	Bugula neritina	Intra-species
KC129791	JX183877	1	10212	Bryozoa	Bugula neritina	10212	Bryozoa	Bugula neritina	Intra-species
KC129792	JX183882	1.007	10212	Bryozoa	Bugula neritina	10212	Bryozoa	Bugula neritina	Intra-species
KC129792	JX183883	1.033	10212	Bryozoa	Bugula neritina	10212	Bryozoa	Bugula neritina	Intra-species
KC129792	JX183879	1.024	10212	Bryozoa	Bugula neritina	10212	Bryozoa	Bugula neritina	Intra-species
KC129792	JX183878	1.015	10212	Bryozoa	Bugula neritina	10212	Bryozoa	Bugula neritina	Intra-species
KC129792	JX183884	1.033	10212	Bryozoa	Bugula neritina	10212	Bryozoa	Bugula neritina	Intra-species
KC129792	JX183880	1.015	10212	Bryozoa	Bugula neritina	10212	Bryozoa	Bugula neritina	Intra-species
KC129792	JX183877	1.024	10212	Bryozoa	Bugula neritina	10212	Bryozoa	Bugula neritina	Intra-species
KC129792	JX183881	1.007	10212	Bryozoa	Bugula neritina	10212	Bryozoa	Bugula neritina	Intra-species
KC129793	JX183877	1	10212	Bryozoa	Bugula neritina	10212	Bryozoa	Bugula neritina	Intra-species
KC129793	JX183880	0.992	10212	Bryozoa	Bugula neritina	10212	Bryozoa	Bugula neritina	Intra-species
KC129793	JX183884	1.016	10212	Bryozoa	Bugula neritina	10212	Bryozoa	Bugula neritina	Intra-species
KC129793	JX183881	1	10212	Bryozoa	Bugula neritina	10212	Bryozoa	Bugula neritina	Intra-species
KC129793	JX183883	1.007	10212	Bryozoa	Bugula neritina	10212	Bryozoa	Bugula neritina	Intra-species
KC129793	JX183882	1	10212	Bryozoa	Bugula neritina	10212	Bryozoa	Bugula neritina	Intra-species
KC129793	JX183879	1	10212	Bryozoa	Bugula neritina	10212	Bryozoa	Bugula neritina	Intra-species
KC129793	JX183878	0.992	10212	Bryozoa	Bugula neritina	10212	Bryozoa	Bugula neritina	Intra-species
KC129794	JX183882	1	10212	Bryozoa	Bugula neritina	10212	Bryozoa	Bugula neritina	Intra-species
KC129794	JX183879	1	10212	Bryozoa	Bugula neritina	10212	Bryozoa	Bugula neritina	Intra-species
KC129794	JX183881	1	10212	Bryozoa	Bugula neritina	10212	Bryozoa	Bugula neritina	Intra-species
KC129794	JX183877	1	10212	Bryozoa	Bugula neritina	10212	Bryozoa	Bugula neritina	Intra-species
KC129794	JX183884	1.016	10212	Bryozoa	Bugula neritina	10212	Bryozoa	Bugula neritina	Intra-species
KC129794	JX183880	0.992	10212	Bryozoa	Bugula neritina	10212	Bryozoa	Bugula neritina	Intra-species
KC129794	JX183878	0.992	10212	Bryozoa	Bugula neritina	10212	Bryozoa	Bugula neritina	Intra-species
KC129794	JX183883	1.007	10212	Bryozoa	Bugula neritina	10212	Bryozoa	Bugula neritina	Intra-species
KC129795	JX183881	0.998	10212	Bryozoa	Bugula neritina	10212	Bryozoa	Bugula neritina	Intra-species
KC129795	JX183878	1.007	10212	Bryozoa	Bugula neritina	10212	Bryozoa	Bugula neritina	Intra-species
KC129795	JX183880	1.007	10212	Bryozoa	Bugula neritina	10212	Bryozoa	Bugula neritina	Intra-species
KC129795	JX183877	1.015	10212	Bryozoa	Bugula neritina	10212	Bryozoa	Bugula neritina	Intra-species
KC129795	JX183879	1.015	10212	Bryozoa	Bugula neritina	10212	Bryozoa	Bugula neritina	Intra-species
KC129795	JX183884	1.024	10212	Bryozoa	Bugula neritina	10212	Bryozoa	Bugula neritina	Intra-species
KC129795	JX183883	1.024	10212	Bryozoa	Bugula neritina	10212	Bryozoa	Bugula neritina	Intra-species
KC129795	JX183882	0.998	10212	Bryozoa	Bugula neritina	10212	Bryozoa	Bugula neritina	Intra-species
KC129796	JX183879	1.007	10212	Bryozoa	Bugula neritina	10212	Bryozoa	Bugula neritina	Intra-species
KC129796	JX183878	1	10212	Bryozoa	Bugula neritina	10212	Bryozoa	Bugula neritina	Intra-species
KC129796	JX183880	1	10212	Bryozoa	Bugula neritina	10212	Bryozoa	Bugula neritina	Intra-species
KC129796	JX183884	1.016	10212	Bryozoa	Bugula neritina	10212	Bryozoa	Bugula neritina	Intra-species
KC129796	JX183881	0.992	10212	Bryozoa	Bugula neritina	10212	Bryozoa	Bugula neritina	Intra-species
KC129796	JX183877	1.007	10212	Bryozoa	Bugula neritina	10212	Bryozoa	Bugula neritina	Intra-species
KC129796	JX183883	1.015	10212	Bryozoa	Bugula neritina	10212	Bryozoa	Bugula neritina	Intra-species
KC129796	JX183882	0.992	10212	Bryozoa	Bugula neritina	10212	Bryozoa	Bugula neritina	Intra-species
KC129797	JX183879	1	10212	Bryozoa	Bugula neritina	10212	Bryozoa	Bugula neritina	Intra-species
KC129797	JX183882	1	10212	Bryozoa	Bugula neritina	10212	Bryozoa	Bugula neritina	Intra-species
KC129797	JX183880	0.992	10212	Bryozoa	Bugula neritina	10212	Bryozoa	Bugula neritina	Intra-species
KC129797	JX183878	0.992	10212	Bryozoa	Bugula neritina	10212	Bryozoa	Bugula neritina	Intra-species
KC129797	JX183884	1.016	10212	Bryozoa	Bugula neritina	10212	Bryozoa	Bugula neritina	Intra-species
KC129797	JX183883	1.007	10212	Bryozoa	Bugula neritina	10212	Bryozoa	Bugula neritina	Intra-species
KC129797	JX183881	1	10212	Bryozoa	Bugula neritina	10212	Bryozoa	Bugula neritina	Intra-species
KC129797	JX183877	1	10212	Bryozoa	Bugula neritina	10212	Bryozoa	Bugula neritina	Intra-species
KC129798	JX183883	1.015	10212	Bryozoa	Bugula neritina	10212	Bryozoa	Bugula neritina	Intra-species
KC129798	JX183881	0.992	10212	Bryozoa	Bugula neritina	10212	Bryozoa	Bugula neritina	Intra-species
KC129798	JX183884	1.016	10212	Bryozoa	Bugula neritina	10212	Bryozoa	Bugula neritina	Intra-species
KC129798	JX183880	1	10212	Bryozoa	Bugula neritina	10212	Bryozoa	Bugula neritina	Intra-species
KC129798	JX183882	0.992	10212	Bryozoa	Bugula neritina	10212	Bryozoa	Bugula neritina	Intra-species
KC129798	JX183878	1	10212	Bryozoa	Bugula neritina	10212	Bryozoa	Bugula neritina	Intra-species
KC129798	JX183877	1.007	10212	Bryozoa	Bugula neritina	10212	Bryozoa	Bugula neritina	Intra-species
KC129798	JX183879	1.007	10212	Bryozoa	Bugula neritina	10212	Bryozoa	Bugula neritina	Intra-species
KC129799	JX183880	1	10212	Bryozoa	Bugula neritina	10212	Bryozoa	Bugula neritina	Intra-species
KC129799	JX183882	0.991	10212	Bryozoa	Bugula neritina	10212	Bryozoa	Bugula neritina	Intra-species
KC129799	JX183884	1.019	10212	Bryozoa	Bugula neritina	10212	Bryozoa	Bugula neritina	Intra-species
KC129799	JX183879	1.009	10212	Bryozoa	Bugula neritina	10212	Bryozoa	Bugula neritina	Intra-species
KC129799	JX183877	1.009	10212	Bryozoa	Bugula neritina	10212	Bryozoa	Bugula neritina	Intra-species
KC129799	JX183883	1.019	10212	Bryozoa	Bugula neritina	10212	Bryozoa	Bugula neritina	Intra-species
KC129799	JX183881	0.991	10212	Bryozoa	Bugula neritina	10212	Bryozoa	Bugula neritina	Intra-species
KC129799	JX183878	1	10212	Bryozoa	Bugula neritina	10212	Bryozoa	Bugula neritina	Intra-species
KC129800	JX183884	1.016	10212	Bryozoa	Bugula neritina	10212	Bryozoa	Bugula neritina	Intra-species
KC129800	JX183879	1.007	10212	Bryozoa	Bugula neritina	10212	Bryozoa	Bugula neritina	Intra-species
KC129800	JX183882	0.992	10212	Bryozoa	Bugula neritina	10212	Bryozoa	Bugula neritina	Intra-species
KC129800	JX183883	1.015	10212	Bryozoa	Bugula neritina	10212	Bryozoa	Bugula neritina	Intra-species
KC129800	JX183880	1	10212	Bryozoa	Bugula neritina	10212	Bryozoa	Bugula neritina	Intra-species
KC129800	JX183877	1.007	10212	Bryozoa	Bugula neritina	10212	Bryozoa	Bugula neritina	Intra-species
KC129800	JX183881	0.992	10212	Bryozoa	Bugula neritina	10212	Bryozoa	Bugula neritina	Intra-species
KC129800	JX183878	1	10212	Bryozoa	Bugula neritina	10212	Bryozoa	Bugula neritina	Intra-species
KC129801	JX183881	1	10212	Bryozoa	Bugula neritina	10212	Bryozoa	Bugula neritina	Intra-species
KC129801	JX183884	1.016	10212	Bryozoa	Bugula neritina	10212	Bryozoa	Bugula neritina	Intra-species
KC129801	JX183879	1	10212	Bryozoa	Bugula neritina	10212	Bryozoa	Bugula neritina	Intra-species
KC129801	JX183880	0.992	10212	Bryozoa	Bugula neritina	10212	Bryozoa	Bugula neritina	Intra-species
KC129801	JX183882	1	10212	Bryozoa	Bugula neritina	10212	Bryozoa	Bugula neritina	Intra-species
KC129801	JX183878	0.992	10212	Bryozoa	Bugula neritina	10212	Bryozoa	Bugula neritina	Intra-species
KC129801	JX183877	1	10212	Bryozoa	Bugula neritina	10212	Bryozoa	Bugula neritina	Intra-species
KC129801	JX183883	1.007	10212	Bryozoa	Bugula neritina	10212	Bryozoa	Bugula neritina	Intra-species
KC129802	JX183878	0.992	10212	Bryozoa	Bugula neritina	10212	Bryozoa	Bugula neritina	Intra-species
KC129802	JX183882	1	10212	Bryozoa	Bugula neritina	10212	Bryozoa	Bugula neritina	Intra-species
KC129802	JX183884	1.016	10212	Bryozoa	Bugula neritina	10212	Bryozoa	Bugula neritina	Intra-species
KC129802	JX183881	1	10212	Bryozoa	Bugula neritina	10212	Bryozoa	Bugula neritina	Intra-species
KC129802	JX183883	1.007	10212	Bryozoa	Bugula neritina	10212	Bryozoa	Bugula neritina	Intra-species
KC129802	JX183877	1	10212	Bryozoa	Bugula neritina	10212	Bryozoa	Bugula neritina	Intra-species
KC129802	JX183879	1	10212	Bryozoa	Bugula neritina	10212	Bryozoa	Bugula neritina	Intra-species
KC129802	JX183880	0.992	10212	Bryozoa	Bugula neritina	10212	Bryozoa	Bugula neritina	Intra-species
KC129803	JX183884	1.016	10212	Bryozoa	Bugula neritina	10212	Bryozoa	Bugula neritina	Intra-species
KC129803	JX183882	1	10212	Bryozoa	Bugula neritina	10212	Bryozoa	Bugula neritina	Intra-species
KC129803	JX183878	0.992	10212	Bryozoa	Bugula neritina	10212	Bryozoa	Bugula neritina	Intra-species
KC129803	JX183877	1	10212	Bryozoa	Bugula neritina	10212	Bryozoa	Bugula neritina	Intra-species
KC129803	JX183883	1.007	10212	Bryozoa	Bugula neritina	10212	Bryozoa	Bugula neritina	Intra-species
KC129803	JX183881	1	10212	Bryozoa	Bugula neritina	10212	Bryozoa	Bugula neritina	Intra-species
KC129803	JX183879	1	10212	Bryozoa	Bugula neritina	10212	Bryozoa	Bugula neritina	Intra-species
KC129803	JX183880	0.992	10212	Bryozoa	Bugula neritina	10212	Bryozoa	Bugula neritina	Intra-species
KC129804	JX183883	1.029	10212	Bryozoa	Bugula neritina	10212	Bryozoa	Bugula neritina	Intra-species
KC129804	JX183881	1.019	10212	Bryozoa	Bugula neritina	10212	Bryozoa	Bugula neritina	Intra-species
KC129804	JX183877	1.039	10212	Bryozoa	Bugula neritina	10212	Bryozoa	Bugula neritina	Intra-species
KC129804	JX183878	1.029	10212	Bryozoa	Bugula neritina	10212	Bryozoa	Bugula neritina	Intra-species
KC129804	JX183880	1.029	10212	Bryozoa	Bugula neritina	10212	Bryozoa	Bugula neritina	Intra-species
KC129804	JX183884	1.066	10212	Bryozoa	Bugula neritina	10212	Bryozoa	Bugula neritina	Intra-species
KC129804	JX183882	1.019	10212	Bryozoa	Bugula neritina	10212	Bryozoa	Bugula neritina	Intra-species
KC129804	JX183879	1.029	10212	Bryozoa	Bugula neritina	10212	Bryozoa	Bugula neritina	Intra-species
KC129805	JX183877	1	10212	Bryozoa	Bugula neritina	10212	Bryozoa	Bugula neritina	Intra-species
KC129805	JX183881	1	10212	Bryozoa	Bugula neritina	10212	Bryozoa	Bugula neritina	Intra-species
KC129805	JX183882	1	10212	Bryozoa	Bugula neritina	10212	Bryozoa	Bugula neritina	Intra-species
KC129805	JX183878	0.992	10212	Bryozoa	Bugula neritina	10212	Bryozoa	Bugula neritina	Intra-species
KC129805	JX183883	1.007	10212	Bryozoa	Bugula neritina	10212	Bryozoa	Bugula neritina	Intra-species
KC129805	JX183884	1.016	10212	Bryozoa	Bugula neritina	10212	Bryozoa	Bugula neritina	Intra-species
KC129805	JX183879	1	10212	Bryozoa	Bugula neritina	10212	Bryozoa	Bugula neritina	Intra-species
KC129805	JX183880	0.992	10212	Bryozoa	Bugula neritina	10212	Bryozoa	Bugula neritina	Intra-species
KC129806	JX183880	0.992	10212	Bryozoa	Bugula neritina	10212	Bryozoa	Bugula neritina	Intra-species
KC129806	JX183883	1.007	10212	Bryozoa	Bugula neritina	10212	Bryozoa	Bugula neritina	Intra-species
KC129806	JX183877	1	10212	Bryozoa	Bugula neritina	10212	Bryozoa	Bugula neritina	Intra-species
KC129806	JX183881	1	10212	Bryozoa	Bugula neritina	10212	Bryozoa	Bugula neritina	Intra-species
KC129806	JX183878	0.992	10212	Bryozoa	Bugula neritina	10212	Bryozoa	Bugula neritina	Intra-species
KC129806	JX183879	1	10212	Bryozoa	Bugula neritina	10212	Bryozoa	Bugula neritina	Intra-species
KC129806	JX183882	1	10212	Bryozoa	Bugula neritina	10212	Bryozoa	Bugula neritina	Intra-species
KC129806	JX183884	1.016	10212	Bryozoa	Bugula neritina	10212	Bryozoa	Bugula neritina	Intra-species
KC129807	JX183880	0.992	10212	Bryozoa	Bugula neritina	10212	Bryozoa	Bugula neritina	Intra-species
KC129807	JX183879	1	10212	Bryozoa	Bugula neritina	10212	Bryozoa	Bugula neritina	Intra-species
KC129807	JX183877	1	10212	Bryozoa	Bugula neritina	10212	Bryozoa	Bugula neritina	Intra-species
KC129807	JX183878	0.992	10212	Bryozoa	Bugula neritina	10212	Bryozoa	Bugula neritina	Intra-species
KC129807	JX183884	1.016	10212	Bryozoa	Bugula neritina	10212	Bryozoa	Bugula neritina	Intra-species
KC129807	JX183882	1	10212	Bryozoa	Bugula neritina	10212	Bryozoa	Bugula neritina	Intra-species
KC129807	JX183883	1.007	10212	Bryozoa	Bugula neritina	10212	Bryozoa	Bugula neritina	Intra-species
KC129807	JX183881	1	10212	Bryozoa	Bugula neritina	10212	Bryozoa	Bugula neritina	Intra-species
KC129808	JX183878	0.992	10212	Bryozoa	Bugula neritina	10212	Bryozoa	Bugula neritina	Intra-species
KC129808	JX183877	1	10212	Bryozoa	Bugula neritina	10212	Bryozoa	Bugula neritina	Intra-species
KC129808	JX183879	1	10212	Bryozoa	Bugula neritina	10212	Bryozoa	Bugula neritina	Intra-species
KC129808	JX183881	1	10212	Bryozoa	Bugula neritina	10212	Bryozoa	Bugula neritina	Intra-species
KC129808	JX183882	1	10212	Bryozoa	Bugula neritina	10212	Bryozoa	Bugula neritina	Intra-species
KC129808	JX183880	0.992	10212	Bryozoa	Bugula neritina	10212	Bryozoa	Bugula neritina	Intra-species
KC129808	JX183883	1.007	10212	Bryozoa	Bugula neritina	10212	Bryozoa	Bugula neritina	Intra-species
KC129808	JX183884	1.016	10212	Bryozoa	Bugula neritina	10212	Bryozoa	Bugula neritina	Intra-species
KC129809	JX183877	1	10212	Bryozoa	Bugula neritina	10212	Bryozoa	Bugula neritina	Intra-species
KC129809	JX183880	0.992	10212	Bryozoa	Bugula neritina	10212	Bryozoa	Bugula neritina	Intra-species
KC129809	JX183878	0.992	10212	Bryozoa	Bugula neritina	10212	Bryozoa	Bugula neritina	Intra-species
KC129809	JX183883	1.007	10212	Bryozoa	Bugula neritina	10212	Bryozoa	Bugula neritina	Intra-species
KC129809	JX183879	1	10212	Bryozoa	Bugula neritina	10212	Bryozoa	Bugula neritina	Intra-species
KC129809	JX183881	1	10212	Bryozoa	Bugula neritina	10212	Bryozoa	Bugula neritina	Intra-species
KC129809	JX183884	1.016	10212	Bryozoa	Bugula neritina	10212	Bryozoa	Bugula neritina	Intra-species
KC129809	JX183882	1	10212	Bryozoa	Bugula neritina	10212	Bryozoa	Bugula neritina	Intra-species
KC129810	JX183882	1.023	10212	Bryozoa	Bugula neritina	10212	Bryozoa	Bugula neritina	Intra-species
KC129810	JX183879	1	10212	Bryozoa	Bugula neritina	10212	Bryozoa	Bugula neritina	Intra-species
KC129810	JX183883	1.007	10212	Bryozoa	Bugula neritina	10212	Bryozoa	Bugula neritina	Intra-species
KC129810	JX183878	0.985	10212	Bryozoa	Bugula neritina	10212	Bryozoa	Bugula neritina	Intra-species
KC129810	JX183884	0.992	10212	Bryozoa	Bugula neritina	10212	Bryozoa	Bugula neritina	Intra-species
KC129810	JX183877	0.992	10212	Bryozoa	Bugula neritina	10212	Bryozoa	Bugula neritina	Intra-species
KC129810	JX183880	0.992	10212	Bryozoa	Bugula neritina	10212	Bryozoa	Bugula neritina	Intra-species
KC129810	JX183881	1.023	10212	Bryozoa	Bugula neritina	10212	Bryozoa	Bugula neritina	Intra-species
KC129811	JX183878	0.985	10212	Bryozoa	Bugula neritina	10212	Bryozoa	Bugula neritina	Intra-species
KC129811	JX183877	0.992	10212	Bryozoa	Bugula neritina	10212	Bryozoa	Bugula neritina	Intra-species
KC129811	JX183884	0.992	10212	Bryozoa	Bugula neritina	10212	Bryozoa	Bugula neritina	Intra-species
KC129811	JX183880	0.992	10212	Bryozoa	Bugula neritina	10212	Bryozoa	Bugula neritina	Intra-species
KC129811	JX183882	1.023	10212	Bryozoa	Bugula neritina	10212	Bryozoa	Bugula neritina	Intra-species
KC129811	JX183883	1.007	10212	Bryozoa	Bugula neritina	10212	Bryozoa	Bugula neritina	Intra-species
KC129811	JX183881	1.023	10212	Bryozoa	Bugula neritina	10212	Bryozoa	Bugula neritina	Intra-species
KC129811	JX183879	1	10212	Bryozoa	Bugula neritina	10212	Bryozoa	Bugula neritina	Intra-species
KC129812	JX183884	0.984	10212	Bryozoa	Bugula neritina	10212	Bryozoa	Bugula neritina	Intra-species
KC129812	JX183880	0.985	10212	Bryozoa	Bugula neritina	10212	Bryozoa	Bugula neritina	Intra-species
KC129812	JX183883	1	10212	Bryozoa	Bugula neritina	10212	Bryozoa	Bugula neritina	Intra-species
KC129812	JX183881	1.015	10212	Bryozoa	Bugula neritina	10212	Bryozoa	Bugula neritina	Intra-species
KC129812	JX183882	1.015	10212	Bryozoa	Bugula neritina	10212	Bryozoa	Bugula neritina	Intra-species
KC129812	JX183878	0.978	10212	Bryozoa	Bugula neritina	10212	Bryozoa	Bugula neritina	Intra-species
KC129812	JX183879	0.992	10212	Bryozoa	Bugula neritina	10212	Bryozoa	Bugula neritina	Intra-species
KC129812	JX183877	0.985	10212	Bryozoa	Bugula neritina	10212	Bryozoa	Bugula neritina	Intra-species
KC129813	JX183883	1.007	10212	Bryozoa	Bugula neritina	10212	Bryozoa	Bugula neritina	Intra-species
KC129813	JX183880	0.992	10212	Bryozoa	Bugula neritina	10212	Bryozoa	Bugula neritina	Intra-species
KC129813	JX183884	1.016	10212	Bryozoa	Bugula neritina	10212	Bryozoa	Bugula neritina	Intra-species
KC129813	JX183877	1	10212	Bryozoa	Bugula neritina	10212	Bryozoa	Bugula neritina	Intra-species
KC129813	JX183882	1	10212	Bryozoa	Bugula neritina	10212	Bryozoa	Bugula neritina	Intra-species
KC129813	JX183878	0.992	10212	Bryozoa	Bugula neritina	10212	Bryozoa	Bugula neritina	Intra-species
KC129813	JX183879	1	10212	Bryozoa	Bugula neritina	10212	Bryozoa	Bugula neritina	Intra-species
KC129813	JX183881	1	10212	Bryozoa	Bugula neritina	10212	Bryozoa	Bugula neritina	Intra-species
KC129814	JX183877	1	10212	Bryozoa	Bugula neritina	10212	Bryozoa	Bugula neritina	Intra-species
KC129814	JX183879	1	10212	Bryozoa	Bugula neritina	10212	Bryozoa	Bugula neritina	Intra-species
KC129814	JX183882	1	10212	Bryozoa	Bugula neritina	10212	Bryozoa	Bugula neritina	Intra-species
KC129814	JX183878	0.992	10212	Bryozoa	Bugula neritina	10212	Bryozoa	Bugula neritina	Intra-species
KC129814	JX183880	0.992	10212	Bryozoa	Bugula neritina	10212	Bryozoa	Bugula neritina	Intra-species
KC129814	JX183884	1.016	10212	Bryozoa	Bugula neritina	10212	Bryozoa	Bugula neritina	Intra-species
KC129814	JX183881	1	10212	Bryozoa	Bugula neritina	10212	Bryozoa	Bugula neritina	Intra-species
KC129814	JX183883	1.007	10212	Bryozoa	Bugula neritina	10212	Bryozoa	Bugula neritina	Intra-species
KC129815	JX183877	1	10212	Bryozoa	Bugula neritina	10212	Bryozoa	Bugula neritina	Intra-species
KC129815	JX183882	1	10212	Bryozoa	Bugula neritina	10212	Bryozoa	Bugula neritina	Intra-species
KC129815	JX183879	1	10212	Bryozoa	Bugula neritina	10212	Bryozoa	Bugula neritina	Intra-species
KC129815	JX183884	1.016	10212	Bryozoa	Bugula neritina	10212	Bryozoa	Bugula neritina	Intra-species
KC129815	JX183881	1	10212	Bryozoa	Bugula neritina	10212	Bryozoa	Bugula neritina	Intra-species
KC129815	JX183878	0.992	10212	Bryozoa	Bugula neritina	10212	Bryozoa	Bugula neritina	Intra-species
KC129815	JX183883	1.007	10212	Bryozoa	Bugula neritina	10212	Bryozoa	Bugula neritina	Intra-species
KC129815	JX183880	0.992	10212	Bryozoa	Bugula neritina	10212	Bryozoa	Bugula neritina	Intra-species
KC129816	JX183877	1	10212	Bryozoa	Bugula neritina	10212	Bryozoa	Bugula neritina	Intra-species
KC129816	JX183879	1	10212	Bryozoa	Bugula neritina	10212	Bryozoa	Bugula neritina	Intra-species
KC129816	JX183878	0.992	10212	Bryozoa	Bugula neritina	10212	Bryozoa	Bugula neritina	Intra-species
KC129816	JX183881	1	10212	Bryozoa	Bugula neritina	10212	Bryozoa	Bugula neritina	Intra-species
KC129816	JX183883	1.007	10212	Bryozoa	Bugula neritina	10212	Bryozoa	Bugula neritina	Intra-species
KC129816	JX183880	0.992	10212	Bryozoa	Bugula neritina	10212	Bryozoa	Bugula neritina	Intra-species
KC129816	JX183882	1	10212	Bryozoa	Bugula neritina	10212	Bryozoa	Bugula neritina	Intra-species
KC129816	JX183884	1.016	10212	Bryozoa	Bugula neritina	10212	Bryozoa	Bugula neritina	Intra-species
KC129817	JX183878	0.992	10212	Bryozoa	Bugula neritina	10212	Bryozoa	Bugula neritina	Intra-species
KC129817	JX183880	0.992	10212	Bryozoa	Bugula neritina	10212	Bryozoa	Bugula neritina	Intra-species
KC129817	JX183882	1	10212	Bryozoa	Bugula neritina	10212	Bryozoa	Bugula neritina	Intra-species
KC129817	JX183884	1.016	10212	Bryozoa	Bugula neritina	10212	Bryozoa	Bugula neritina	Intra-species
KC129817	JX183879	1	10212	Bryozoa	Bugula neritina	10212	Bryozoa	Bugula neritina	Intra-species
KC129817	JX183883	1.007	10212	Bryozoa	Bugula neritina	10212	Bryozoa	Bugula neritina	Intra-species
KC129817	JX183881	1	10212	Bryozoa	Bugula neritina	10212	Bryozoa	Bugula neritina	Intra-species
KC129817	JX183877	1	10212	Bryozoa	Bugula neritina	10212	Bryozoa	Bugula neritina	Intra-species
KC129818	JX183884	1.016	10212	Bryozoa	Bugula neritina	10212	Bryozoa	Bugula neritina	Intra-species
KC129818	JX183879	1	10212	Bryozoa	Bugula neritina	10212	Bryozoa	Bugula neritina	Intra-species
KC129818	JX183881	1	10212	Bryozoa	Bugula neritina	10212	Bryozoa	Bugula neritina	Intra-species
KC129818	JX183878	0.992	10212	Bryozoa	Bugula neritina	10212	Bryozoa	Bugula neritina	Intra-species
KC129818	JX183882	1	10212	Bryozoa	Bugula neritina	10212	Bryozoa	Bugula neritina	Intra-species
KC129818	JX183883	1.007	10212	Bryozoa	Bugula neritina	10212	Bryozoa	Bugula neritina	Intra-species
KC129818	JX183880	0.992	10212	Bryozoa	Bugula neritina	10212	Bryozoa	Bugula neritina	Intra-species
KC129818	JX183877	1	10212	Bryozoa	Bugula neritina	10212	Bryozoa	Bugula neritina	Intra-species
KC129819	JX183879	1.002	10212	Bryozoa	Bugula neritina	10212	Bryozoa	Bugula neritina	Intra-species
KC129819	JX183882	1.002	10212	Bryozoa	Bugula neritina	10212	Bryozoa	Bugula neritina	Intra-species
KC129819	JX183877	1.002	10212	Bryozoa	Bugula neritina	10212	Bryozoa	Bugula neritina	Intra-species
KC129819	JX183884	1.016	10212	Bryozoa	Bugula neritina	10212	Bryozoa	Bugula neritina	Intra-species
KC129819	JX183878	0.995	10212	Bryozoa	Bugula neritina	10212	Bryozoa	Bugula neritina	Intra-species
KC129819	JX183883	1.01	10212	Bryozoa	Bugula neritina	10212	Bryozoa	Bugula neritina	Intra-species
KC129819	JX183880	0.995	10212	Bryozoa	Bugula neritina	10212	Bryozoa	Bugula neritina	Intra-species
KC129819	JX183881	1.002	10212	Bryozoa	Bugula neritina	10212	Bryozoa	Bugula neritina	Intra-species
KC129820	JX183879	1.036	10212	Bryozoa	Bugula neritina	10212	Bryozoa	Bugula neritina	Intra-species
KC129820	JX183883	1.036	10212	Bryozoa	Bugula neritina	10212	Bryozoa	Bugula neritina	Intra-species
KC129820	JX183881	1.027	10212	Bryozoa	Bugula neritina	10212	Bryozoa	Bugula neritina	Intra-species
KC129820	JX183880	1.027	10212	Bryozoa	Bugula neritina	10212	Bryozoa	Bugula neritina	Intra-species
KC129820	JX183878	1.027	10212	Bryozoa	Bugula neritina	10212	Bryozoa	Bugula neritina	Intra-species
KC129820	JX183882	1.027	10212	Bryozoa	Bugula neritina	10212	Bryozoa	Bugula neritina	Intra-species
KC129820	JX183884	1.049	10212	Bryozoa	Bugula neritina	10212	Bryozoa	Bugula neritina	Intra-species
KC129820	JX183877	1.036	10212	Bryozoa	Bugula neritina	10212	Bryozoa	Bugula neritina	Intra-species
KC129821	JX183877	1.024	10212	Bryozoa	Bugula neritina	10212	Bryozoa	Bugula neritina	Intra-species
KC129821	JX183881	1.007	10212	Bryozoa	Bugula neritina	10212	Bryozoa	Bugula neritina	Intra-species
KC129821	JX183883	1.033	10212	Bryozoa	Bugula neritina	10212	Bryozoa	Bugula neritina	Intra-species
KC129821	JX183882	1.007	10212	Bryozoa	Bugula neritina	10212	Bryozoa	Bugula neritina	Intra-species
KC129821	JX183879	1.024	10212	Bryozoa	Bugula neritina	10212	Bryozoa	Bugula neritina	Intra-species
KC129821	JX183880	1.015	10212	Bryozoa	Bugula neritina	10212	Bryozoa	Bugula neritina	Intra-species
KC129821	JX183884	1.033	10212	Bryozoa	Bugula neritina	10212	Bryozoa	Bugula neritina	Intra-species
KC129821	JX183878	1.015	10212	Bryozoa	Bugula neritina	10212	Bryozoa	Bugula neritina	Intra-species
KC129822	JX183883	1.015	10212	Bryozoa	Bugula neritina	10212	Bryozoa	Bugula neritina	Intra-species
KC129822	JX183877	1.007	10212	Bryozoa	Bugula neritina	10212	Bryozoa	Bugula neritina	Intra-species
KC129822	JX183879	1.007	10212	Bryozoa	Bugula neritina	10212	Bryozoa	Bugula neritina	Intra-species
KC129822	JX183881	0.992	10212	Bryozoa	Bugula neritina	10212	Bryozoa	Bugula neritina	Intra-species
KC129822	JX183878	1	10212	Bryozoa	Bugula neritina	10212	Bryozoa	Bugula neritina	Intra-species
KC129822	JX183882	0.992	10212	Bryozoa	Bugula neritina	10212	Bryozoa	Bugula neritina	Intra-species
KC129822	JX183880	1	10212	Bryozoa	Bugula neritina	10212	Bryozoa	Bugula neritina	Intra-species
KC129822	JX183884	1.016	10212	Bryozoa	Bugula neritina	10212	Bryozoa	Bugula neritina	Intra-species
KC129823	JX183884	1.016	10212	Bryozoa	Bugula neritina	10212	Bryozoa	Bugula neritina	Intra-species
KC129823	JX183881	0.992	10212	Bryozoa	Bugula neritina	10212	Bryozoa	Bugula neritina	Intra-species
KC129823	JX183883	1.015	10212	Bryozoa	Bugula neritina	10212	Bryozoa	Bugula neritina	Intra-species
KC129823	JX183878	1	10212	Bryozoa	Bugula neritina	10212	Bryozoa	Bugula neritina	Intra-species
KC129823	JX183877	1.007	10212	Bryozoa	Bugula neritina	10212	Bryozoa	Bugula neritina	Intra-species
KC129823	JX183879	1.007	10212	Bryozoa	Bugula neritina	10212	Bryozoa	Bugula neritina	Intra-species
KC129823	JX183880	1	10212	Bryozoa	Bugula neritina	10212	Bryozoa	Bugula neritina	Intra-species
KC129823	JX183882	0.992	10212	Bryozoa	Bugula neritina	10212	Bryozoa	Bugula neritina	Intra-species
KC129824	JX183878	1	10212	Bryozoa	Bugula neritina	10212	Bryozoa	Bugula neritina	Intra-species
KC129824	JX183881	0.992	10212	Bryozoa	Bugula neritina	10212	Bryozoa	Bugula neritina	Intra-species
KC129824	JX183877	1.007	10212	Bryozoa	Bugula neritina	10212	Bryozoa	Bugula neritina	Intra-species
KC129824	JX183879	1.007	10212	Bryozoa	Bugula neritina	10212	Bryozoa	Bugula neritina	Intra-species
KC129824	JX183883	1.015	10212	Bryozoa	Bugula neritina	10212	Bryozoa	Bugula neritina	Intra-species
KC129824	JX183880	1	10212	Bryozoa	Bugula neritina	10212	Bryozoa	Bugula neritina	Intra-species
KC129824	JX183884	1.016	10212	Bryozoa	Bugula neritina	10212	Bryozoa	Bugula neritina	Intra-species
KC129824	JX183882	0.992	10212	Bryozoa	Bugula neritina	10212	Bryozoa	Bugula neritina	Intra-species
KC129825	JX183884	0.992	10212	Bryozoa	Bugula neritina	10212	Bryozoa	Bugula neritina	Intra-species
KC129825	JX183879	1	10212	Bryozoa	Bugula neritina	10212	Bryozoa	Bugula neritina	Intra-species
KC129825	JX183880	0.992	10212	Bryozoa	Bugula neritina	10212	Bryozoa	Bugula neritina	Intra-species
KC129825	JX183882	1.023	10212	Bryozoa	Bugula neritina	10212	Bryozoa	Bugula neritina	Intra-species
KC129825	JX183877	0.992	10212	Bryozoa	Bugula neritina	10212	Bryozoa	Bugula neritina	Intra-species
KC129825	JX183883	1.007	10212	Bryozoa	Bugula neritina	10212	Bryozoa	Bugula neritina	Intra-species
KC129825	JX183881	1.023	10212	Bryozoa	Bugula neritina	10212	Bryozoa	Bugula neritina	Intra-species
KC129825	JX183878	0.985	10212	Bryozoa	Bugula neritina	10212	Bryozoa	Bugula neritina	Intra-species
KC129826	JX183881	0.992	10212	Bryozoa	Bugula neritina	10212	Bryozoa	Bugula neritina	Intra-species
KC129826	JX183882	0.992	10212	Bryozoa	Bugula neritina	10212	Bryozoa	Bugula neritina	Intra-species
KC129826	JX183879	1.007	10212	Bryozoa	Bugula neritina	10212	Bryozoa	Bugula neritina	Intra-species
KC129826	JX183877	1.007	10212	Bryozoa	Bugula neritina	10212	Bryozoa	Bugula neritina	Intra-species
KC129826	JX183880	1	10212	Bryozoa	Bugula neritina	10212	Bryozoa	Bugula neritina	Intra-species
KC129826	JX183884	1.016	10212	Bryozoa	Bugula neritina	10212	Bryozoa	Bugula neritina	Intra-species
KC129826	JX183878	1	10212	Bryozoa	Bugula neritina	10212	Bryozoa	Bugula neritina	Intra-species
KC129826	JX183883	1.015	10212	Bryozoa	Bugula neritina	10212	Bryozoa	Bugula neritina	Intra-species
KC129827	JX183883	1.015	10212	Bryozoa	Bugula neritina	10212	Bryozoa	Bugula neritina	Intra-species
KC129827	JX183884	1.016	10212	Bryozoa	Bugula neritina	10212	Bryozoa	Bugula neritina	Intra-species
KC129827	JX183878	1	10212	Bryozoa	Bugula neritina	10212	Bryozoa	Bugula neritina	Intra-species
KC129827	JX183882	0.992	10212	Bryozoa	Bugula neritina	10212	Bryozoa	Bugula neritina	Intra-species
KC129827	JX183877	1.007	10212	Bryozoa	Bugula neritina	10212	Bryozoa	Bugula neritina	Intra-species
KC129827	JX183881	0.992	10212	Bryozoa	Bugula neritina	10212	Bryozoa	Bugula neritina	Intra-species
KC129827	JX183880	1	10212	Bryozoa	Bugula neritina	10212	Bryozoa	Bugula neritina	Intra-species
KC129827	JX183879	1.007	10212	Bryozoa	Bugula neritina	10212	Bryozoa	Bugula neritina	Intra-species
KC129828	JX183880	1	10212	Bryozoa	Bugula neritina	10212	Bryozoa	Bugula neritina	Intra-species
KC129828	JX183881	0.992	10212	Bryozoa	Bugula neritina	10212	Bryozoa	Bugula neritina	Intra-species
KC129828	JX183882	0.992	10212	Bryozoa	Bugula neritina	10212	Bryozoa	Bugula neritina	Intra-species
KC129828	JX183883	1.015	10212	Bryozoa	Bugula neritina	10212	Bryozoa	Bugula neritina	Intra-species
KC129828	JX183877	1.007	10212	Bryozoa	Bugula neritina	10212	Bryozoa	Bugula neritina	Intra-species
KC129828	JX183879	1.007	10212	Bryozoa	Bugula neritina	10212	Bryozoa	Bugula neritina	Intra-species
KC129828	JX183884	1.016	10212	Bryozoa	Bugula neritina	10212	Bryozoa	Bugula neritina	Intra-species
KC129828	JX183878	1	10212	Bryozoa	Bugula neritina	10212	Bryozoa	Bugula neritina	Intra-species
KC129829	JX183884	1.016	10212	Bryozoa	Bugula neritina	10212	Bryozoa	Bugula neritina	Intra-species
KC129829	JX183877	1.007	10212	Bryozoa	Bugula neritina	10212	Bryozoa	Bugula neritina	Intra-species
KC129829	JX183879	1.007	10212	Bryozoa	Bugula neritina	10212	Bryozoa	Bugula neritina	Intra-species
KC129829	JX183878	1	10212	Bryozoa	Bugula neritina	10212	Bryozoa	Bugula neritina	Intra-species
KC129829	JX183882	0.992	10212	Bryozoa	Bugula neritina	10212	Bryozoa	Bugula neritina	Intra-species
KC129829	JX183881	0.992	10212	Bryozoa	Bugula neritina	10212	Bryozoa	Bugula neritina	Intra-species
KC129829	JX183883	1.015	10212	Bryozoa	Bugula neritina	10212	Bryozoa	Bugula neritina	Intra-species
KC129829	JX183880	1	10212	Bryozoa	Bugula neritina	10212	Bryozoa	Bugula neritina	Intra-species
KC129830	JX183877	0.992	10212	Bryozoa	Bugula neritina	10212	Bryozoa	Bugula neritina	Intra-species
KC129830	JX183878	0.985	10212	Bryozoa	Bugula neritina	10212	Bryozoa	Bugula neritina	Intra-species
KC129830	JX183880	0.992	10212	Bryozoa	Bugula neritina	10212	Bryozoa	Bugula neritina	Intra-species
KC129830	JX183884	0.992	10212	Bryozoa	Bugula neritina	10212	Bryozoa	Bugula neritina	Intra-species
KC129830	JX183883	1.007	10212	Bryozoa	Bugula neritina	10212	Bryozoa	Bugula neritina	Intra-species
KC129830	JX183879	1	10212	Bryozoa	Bugula neritina	10212	Bryozoa	Bugula neritina	Intra-species
KC129830	JX183881	1.023	10212	Bryozoa	Bugula neritina	10212	Bryozoa	Bugula neritina	Intra-species
KC129830	JX183882	1.023	10212	Bryozoa	Bugula neritina	10212	Bryozoa	Bugula neritina	Intra-species
KC129831	JX183881	0.992	10212	Bryozoa	Bugula neritina	10212	Bryozoa	Bugula neritina	Intra-species
KC129831	JX183879	1.007	10212	Bryozoa	Bugula neritina	10212	Bryozoa	Bugula neritina	Intra-species
KC129831	JX183877	1.007	10212	Bryozoa	Bugula neritina	10212	Bryozoa	Bugula neritina	Intra-species
KC129831	JX183884	1.016	10212	Bryozoa	Bugula neritina	10212	Bryozoa	Bugula neritina	Intra-species
KC129831	JX183883	1.015	10212	Bryozoa	Bugula neritina	10212	Bryozoa	Bugula neritina	Intra-species
KC129831	JX183878	1	10212	Bryozoa	Bugula neritina	10212	Bryozoa	Bugula neritina	Intra-species
KC129831	JX183880	1	10212	Bryozoa	Bugula neritina	10212	Bryozoa	Bugula neritina	Intra-species
KC129831	JX183882	0.992	10212	Bryozoa	Bugula neritina	10212	Bryozoa	Bugula neritina	Intra-species
KC129832	JX183882	0.992	10212	Bryozoa	Bugula neritina	10212	Bryozoa	Bugula neritina	Intra-species
KC129832	JX183883	1.015	10212	Bryozoa	Bugula neritina	10212	Bryozoa	Bugula neritina	Intra-species
KC129832	JX183879	1.007	10212	Bryozoa	Bugula neritina	10212	Bryozoa	Bugula neritina	Intra-species
KC129832	JX183884	1.016	10212	Bryozoa	Bugula neritina	10212	Bryozoa	Bugula neritina	Intra-species
KC129832	JX183881	0.992	10212	Bryozoa	Bugula neritina	10212	Bryozoa	Bugula neritina	Intra-species
KC129832	JX183880	1	10212	Bryozoa	Bugula neritina	10212	Bryozoa	Bugula neritina	Intra-species
KC129832	JX183877	1.007	10212	Bryozoa	Bugula neritina	10212	Bryozoa	Bugula neritina	Intra-species
KC129832	JX183878	1	10212	Bryozoa	Bugula neritina	10212	Bryozoa	Bugula neritina	Intra-species
KC129833	JX183878	0.998	10212	Bryozoa	Bugula neritina	10212	Bryozoa	Bugula neritina	Intra-species
KC129833	JX183884	1.017	10212	Bryozoa	Bugula neritina	10212	Bryozoa	Bugula neritina	Intra-species
KC129833	JX183880	0.98	10212	Bryozoa	Bugula neritina	10212	Bryozoa	Bugula neritina	Intra-species
KC129833	JX183881	0.98	10212	Bryozoa	Bugula neritina	10212	Bryozoa	Bugula neritina	Intra-species
KC129833	JX183877	0.989	10212	Bryozoa	Bugula neritina	10212	Bryozoa	Bugula neritina	Intra-species
KC129833	JX183879	0.989	10212	Bryozoa	Bugula neritina	10212	Bryozoa	Bugula neritina	Intra-species
KC129833	JX183882	0.98	10212	Bryozoa	Bugula neritina	10212	Bryozoa	Bugula neritina	Intra-species
KC129833	JX183883	0.989	10212	Bryozoa	Bugula neritina	10212	Bryozoa	Bugula neritina	Intra-species
KC129834	JX183881	0.971	10212	Bryozoa	Bugula neritina	10212	Bryozoa	Bugula neritina	Intra-species
KC129834	JX183882	0.971	10212	Bryozoa	Bugula neritina	10212	Bryozoa	Bugula neritina	Intra-species
KC129834	JX183880	0.971	10212	Bryozoa	Bugula neritina	10212	Bryozoa	Bugula neritina	Intra-species
KC129834	JX183879	0.98	10212	Bryozoa	Bugula neritina	10212	Bryozoa	Bugula neritina	Intra-species
KC129834	JX183878	0.989	10212	Bryozoa	Bugula neritina	10212	Bryozoa	Bugula neritina	Intra-species
KC129834	JX183884	1.007	10212	Bryozoa	Bugula neritina	10212	Bryozoa	Bugula neritina	Intra-species
KC129834	JX183883	0.98	10212	Bryozoa	Bugula neritina	10212	Bryozoa	Bugula neritina	Intra-species
KC129834	JX183877	0.98	10212	Bryozoa	Bugula neritina	10212	Bryozoa	Bugula neritina	Intra-species
KC129835	JX183883	0.989	10212	Bryozoa	Bugula neritina	10212	Bryozoa	Bugula neritina	Intra-species
KC129835	JX183882	0.98	10212	Bryozoa	Bugula neritina	10212	Bryozoa	Bugula neritina	Intra-species
KC129835	JX183879	0.989	10212	Bryozoa	Bugula neritina	10212	Bryozoa	Bugula neritina	Intra-species
KC129835	JX183880	0.98	10212	Bryozoa	Bugula neritina	10212	Bryozoa	Bugula neritina	Intra-species
KC129835	JX183878	0.998	10212	Bryozoa	Bugula neritina	10212	Bryozoa	Bugula neritina	Intra-species
KC129835	JX183881	0.98	10212	Bryozoa	Bugula neritina	10212	Bryozoa	Bugula neritina	Intra-species
KC129835	JX183884	1.017	10212	Bryozoa	Bugula neritina	10212	Bryozoa	Bugula neritina	Intra-species
KC129835	JX183877	0.989	10212	Bryozoa	Bugula neritina	10212	Bryozoa	Bugula neritina	Intra-species
KC129836	JX183877	0.989	10212	Bryozoa	Bugula neritina	10212	Bryozoa	Bugula neritina	Intra-species
KC129836	JX183879	0.989	10212	Bryozoa	Bugula neritina	10212	Bryozoa	Bugula neritina	Intra-species
KC129836	JX183881	0.98	10212	Bryozoa	Bugula neritina	10212	Bryozoa	Bugula neritina	Intra-species
KC129836	JX183884	1.017	10212	Bryozoa	Bugula neritina	10212	Bryozoa	Bugula neritina	Intra-species
KC129836	JX183878	0.998	10212	Bryozoa	Bugula neritina	10212	Bryozoa	Bugula neritina	Intra-species
KC129836	JX183880	0.98	10212	Bryozoa	Bugula neritina	10212	Bryozoa	Bugula neritina	Intra-species
KC129836	JX183882	0.98	10212	Bryozoa	Bugula neritina	10212	Bryozoa	Bugula neritina	Intra-species
KC129836	JX183883	0.989	10212	Bryozoa	Bugula neritina	10212	Bryozoa	Bugula neritina	Intra-species
KC129837	JX183881	0.98	10212	Bryozoa	Bugula neritina	10212	Bryozoa	Bugula neritina	Intra-species
KC129837	JX183883	0.989	10212	Bryozoa	Bugula neritina	10212	Bryozoa	Bugula neritina	Intra-species
KC129837	JX183878	0.998	10212	Bryozoa	Bugula neritina	10212	Bryozoa	Bugula neritina	Intra-species
KC129837	JX183884	1.017	10212	Bryozoa	Bugula neritina	10212	Bryozoa	Bugula neritina	Intra-species
KC129837	JX183880	0.98	10212	Bryozoa	Bugula neritina	10212	Bryozoa	Bugula neritina	Intra-species
KC129837	JX183882	0.98	10212	Bryozoa	Bugula neritina	10212	Bryozoa	Bugula neritina	Intra-species
KC129837	JX183877	0.989	10212	Bryozoa	Bugula neritina	10212	Bryozoa	Bugula neritina	Intra-species
KC129837	JX183879	0.989	10212	Bryozoa	Bugula neritina	10212	Bryozoa	Bugula neritina	Intra-species
KC129838	JX183884	1.017	10212	Bryozoa	Bugula neritina	10212	Bryozoa	Bugula neritina	Intra-species
KC129838	JX183881	0.98	10212	Bryozoa	Bugula neritina	10212	Bryozoa	Bugula neritina	Intra-species
KC129838	JX183879	0.989	10212	Bryozoa	Bugula neritina	10212	Bryozoa	Bugula neritina	Intra-species
KC129838	JX183880	0.98	10212	Bryozoa	Bugula neritina	10212	Bryozoa	Bugula neritina	Intra-species
KC129838	JX183882	0.98	10212	Bryozoa	Bugula neritina	10212	Bryozoa	Bugula neritina	Intra-species
KC129838	JX183883	0.989	10212	Bryozoa	Bugula neritina	10212	Bryozoa	Bugula neritina	Intra-species
KC129838	JX183878	0.998	10212	Bryozoa	Bugula neritina	10212	Bryozoa	Bugula neritina	Intra-species
KC129838	JX183877	0.989	10212	Bryozoa	Bugula neritina	10212	Bryozoa	Bugula neritina	Intra-species
KC129839	JX183883	0.983	10212	Bryozoa	Bugula neritina	10212	Bryozoa	Bugula neritina	Intra-species
KC129839	JX183884	1.01	10212	Bryozoa	Bugula neritina	10212	Bryozoa	Bugula neritina	Intra-species
KC129839	JX183882	0.974	10212	Bryozoa	Bugula neritina	10212	Bryozoa	Bugula neritina	Intra-species
KC129839	JX183878	0.992	10212	Bryozoa	Bugula neritina	10212	Bryozoa	Bugula neritina	Intra-species
KC129839	JX183881	0.974	10212	Bryozoa	Bugula neritina	10212	Bryozoa	Bugula neritina	Intra-species
KC129839	JX183877	0.983	10212	Bryozoa	Bugula neritina	10212	Bryozoa	Bugula neritina	Intra-species
KC129839	JX183880	0.974	10212	Bryozoa	Bugula neritina	10212	Bryozoa	Bugula neritina	Intra-species
KC129839	JX183879	0.983	10212	Bryozoa	Bugula neritina	10212	Bryozoa	Bugula neritina	Intra-species
KC129840	JX183877	0.989	10212	Bryozoa	Bugula neritina	10212	Bryozoa	Bugula neritina	Intra-species
KC129840	JX183883	0.989	10212	Bryozoa	Bugula neritina	10212	Bryozoa	Bugula neritina	Intra-species
KC129840	JX183879	0.989	10212	Bryozoa	Bugula neritina	10212	Bryozoa	Bugula neritina	Intra-species
KC129840	JX183881	0.98	10212	Bryozoa	Bugula neritina	10212	Bryozoa	Bugula neritina	Intra-species
KC129840	JX183882	0.98	10212	Bryozoa	Bugula neritina	10212	Bryozoa	Bugula neritina	Intra-species
KC129840	JX183880	0.98	10212	Bryozoa	Bugula neritina	10212	Bryozoa	Bugula neritina	Intra-species
KC129840	JX183878	0.998	10212	Bryozoa	Bugula neritina	10212	Bryozoa	Bugula neritina	Intra-species
KC129840	JX183884	1.017	10212	Bryozoa	Bugula neritina	10212	Bryozoa	Bugula neritina	Intra-species
KC129841	JX183882	0.98	10212	Bryozoa	Bugula neritina	10212	Bryozoa	Bugula neritina	Intra-species
KC129841	JX183880	0.98	10212	Bryozoa	Bugula neritina	10212	Bryozoa	Bugula neritina	Intra-species
KC129841	JX183881	0.98	10212	Bryozoa	Bugula neritina	10212	Bryozoa	Bugula neritina	Intra-species
KC129841	JX183878	0.998	10212	Bryozoa	Bugula neritina	10212	Bryozoa	Bugula neritina	Intra-species
KC129841	JX183879	0.989	10212	Bryozoa	Bugula neritina	10212	Bryozoa	Bugula neritina	Intra-species
KC129841	JX183884	1.017	10212	Bryozoa	Bugula neritina	10212	Bryozoa	Bugula neritina	Intra-species
KC129841	JX183883	0.989	10212	Bryozoa	Bugula neritina	10212	Bryozoa	Bugula neritina	Intra-species
KC129841	JX183877	0.989	10212	Bryozoa	Bugula neritina	10212	Bryozoa	Bugula neritina	Intra-species
KC129842	JX183877	0.989	10212	Bryozoa	Bugula neritina	10212	Bryozoa	Bugula neritina	Intra-species
KC129842	JX183882	0.98	10212	Bryozoa	Bugula neritina	10212	Bryozoa	Bugula neritina	Intra-species
KC129842	JX183884	1.017	10212	Bryozoa	Bugula neritina	10212	Bryozoa	Bugula neritina	Intra-species
KC129842	JX183881	0.98	10212	Bryozoa	Bugula neritina	10212	Bryozoa	Bugula neritina	Intra-species
KC129842	JX183883	0.989	10212	Bryozoa	Bugula neritina	10212	Bryozoa	Bugula neritina	Intra-species
KC129842	JX183879	0.989	10212	Bryozoa	Bugula neritina	10212	Bryozoa	Bugula neritina	Intra-species
KC129842	JX183878	0.998	10212	Bryozoa	Bugula neritina	10212	Bryozoa	Bugula neritina	Intra-species
KC129842	JX183880	0.98	10212	Bryozoa	Bugula neritina	10212	Bryozoa	Bugula neritina	Intra-species
KC129843	JX183884	1.017	10212	Bryozoa	Bugula neritina	10212	Bryozoa	Bugula neritina	Intra-species
KC129843	JX183877	0.989	10212	Bryozoa	Bugula neritina	10212	Bryozoa	Bugula neritina	Intra-species
KC129843	JX183881	0.98	10212	Bryozoa	Bugula neritina	10212	Bryozoa	Bugula neritina	Intra-species
KC129843	JX183878	0.998	10212	Bryozoa	Bugula neritina	10212	Bryozoa	Bugula neritina	Intra-species
KC129843	JX183880	0.98	10212	Bryozoa	Bugula neritina	10212	Bryozoa	Bugula neritina	Intra-species
KC129843	JX183883	0.989	10212	Bryozoa	Bugula neritina	10212	Bryozoa	Bugula neritina	Intra-species
KC129843	JX183882	0.98	10212	Bryozoa	Bugula neritina	10212	Bryozoa	Bugula neritina	Intra-species
KC129843	JX183879	0.989	10212	Bryozoa	Bugula neritina	10212	Bryozoa	Bugula neritina	Intra-species
KC129844	JX183881	0.974	10212	Bryozoa	Bugula neritina	10212	Bryozoa	Bugula neritina	Intra-species
KC129844	JX183884	1.01	10212	Bryozoa	Bugula neritina	10212	Bryozoa	Bugula neritina	Intra-species
KC129844	JX183882	0.974	10212	Bryozoa	Bugula neritina	10212	Bryozoa	Bugula neritina	Intra-species
KC129844	JX183880	0.974	10212	Bryozoa	Bugula neritina	10212	Bryozoa	Bugula neritina	Intra-species
KC129844	JX183877	0.983	10212	Bryozoa	Bugula neritina	10212	Bryozoa	Bugula neritina	Intra-species
KC129844	JX183878	0.992	10212	Bryozoa	Bugula neritina	10212	Bryozoa	Bugula neritina	Intra-species
KC129844	JX183883	0.983	10212	Bryozoa	Bugula neritina	10212	Bryozoa	Bugula neritina	Intra-species
KC129844	JX183879	0.983	10212	Bryozoa	Bugula neritina	10212	Bryozoa	Bugula neritina	Intra-species
KC129845	JX183883	0.991	10212	Bryozoa	Bugula neritina	10212	Bryozoa	Bugula neritina	Intra-species
KC129845	JX183879	0.991	10212	Bryozoa	Bugula neritina	10212	Bryozoa	Bugula neritina	Intra-species
KC129845	JX183884	1.015	10212	Bryozoa	Bugula neritina	10212	Bryozoa	Bugula neritina	Intra-species
KC129845	JX183878	0.998	10212	Bryozoa	Bugula neritina	10212	Bryozoa	Bugula neritina	Intra-species
KC129845	JX183880	0.983	10212	Bryozoa	Bugula neritina	10212	Bryozoa	Bugula neritina	Intra-species
KC129845	JX183882	0.983	10212	Bryozoa	Bugula neritina	10212	Bryozoa	Bugula neritina	Intra-species
KC129845	JX183881	0.983	10212	Bryozoa	Bugula neritina	10212	Bryozoa	Bugula neritina	Intra-species
KC129845	JX183877	0.991	10212	Bryozoa	Bugula neritina	10212	Bryozoa	Bugula neritina	Intra-species
KC129846	JX183879	1	10212	Bryozoa	Bugula neritina	10212	Bryozoa	Bugula neritina	Intra-species
KC129846	JX183877	1	10212	Bryozoa	Bugula neritina	10212	Bryozoa	Bugula neritina	Intra-species
KC129846	JX183880	0.992	10212	Bryozoa	Bugula neritina	10212	Bryozoa	Bugula neritina	Intra-species
KC129846	JX183878	0.992	10212	Bryozoa	Bugula neritina	10212	Bryozoa	Bugula neritina	Intra-species
KC129846	JX183884	1.016	10212	Bryozoa	Bugula neritina	10212	Bryozoa	Bugula neritina	Intra-species
KC129846	JX183882	1	10212	Bryozoa	Bugula neritina	10212	Bryozoa	Bugula neritina	Intra-species
KC129846	JX183881	1	10212	Bryozoa	Bugula neritina	10212	Bryozoa	Bugula neritina	Intra-species
KC129846	JX183883	1.007	10212	Bryozoa	Bugula neritina	10212	Bryozoa	Bugula neritina	Intra-species
KC129847	JX183879	1	10212	Bryozoa	Bugula neritina	10212	Bryozoa	Bugula neritina	Intra-species
KC129847	JX183881	1	10212	Bryozoa	Bugula neritina	10212	Bryozoa	Bugula neritina	Intra-species
KC129847	JX183880	0.992	10212	Bryozoa	Bugula neritina	10212	Bryozoa	Bugula neritina	Intra-species
KC129847	JX183884	1.016	10212	Bryozoa	Bugula neritina	10212	Bryozoa	Bugula neritina	Intra-species
KC129847	JX183878	0.992	10212	Bryozoa	Bugula neritina	10212	Bryozoa	Bugula neritina	Intra-species
KC129847	JX183882	1	10212	Bryozoa	Bugula neritina	10212	Bryozoa	Bugula neritina	Intra-species
KC129847	JX183883	1.007	10212	Bryozoa	Bugula neritina	10212	Bryozoa	Bugula neritina	Intra-species
KC129847	JX183877	1	10212	Bryozoa	Bugula neritina	10212	Bryozoa	Bugula neritina	Intra-species
KC129851	KC129831	1.006	10212	Bryozoa	Bugula neritina	10212	Bryozoa	Bugula neritina	Intra-species
KC129851	KC129785	0.999	10212	Bryozoa	Bugula neritina	10212	Bryozoa	Bugula neritina	Intra-species
KC129851	KC129818	0.999	10212	Bryozoa	Bugula neritina	10212	Bryozoa	Bugula neritina	Intra-species
KC129851	KC129773	1.023	10212	Bryozoa	Bugula neritina	10212	Bryozoa	Bugula neritina	Intra-species
KC129851	KC129752	1.006	10212	Bryozoa	Bugula neritina	10212	Bryozoa	Bugula neritina	Intra-species
KC129851	KC129728	1.023	10212	Bryozoa	Bugula neritina	10212	Bryozoa	Bugula neritina	Intra-species
KC129851	KC129799	1.008	10212	Bryozoa	Bugula neritina	10212	Bryozoa	Bugula neritina	Intra-species
KC129851	KC129841	0.98	10212	Bryozoa	Bugula neritina	10212	Bryozoa	Bugula neritina	Intra-species
KC129851	KC129747	1.006	10212	Bryozoa	Bugula neritina	10212	Bryozoa	Bugula neritina	Intra-species
KC129851	KC129761	1.013	10212	Bryozoa	Bugula neritina	10212	Bryozoa	Bugula neritina	Intra-species
KC129851	KC129744	0.999	10212	Bryozoa	Bugula neritina	10212	Bryozoa	Bugula neritina	Intra-species
KC129851	KC129807	0.999	10212	Bryozoa	Bugula neritina	10212	Bryozoa	Bugula neritina	Intra-species
KC129851	KC129778	1.023	10212	Bryozoa	Bugula neritina	10212	Bryozoa	Bugula neritina	Intra-species
KC129851	KC129814	0.999	10212	Bryozoa	Bugula neritina	10212	Bryozoa	Bugula neritina	Intra-species
KC129851	KC129776	1.001	10212	Bryozoa	Bugula neritina	10212	Bryozoa	Bugula neritina	Intra-species
KC129851	KC129819	1.001	10212	Bryozoa	Bugula neritina	10212	Bryozoa	Bugula neritina	Intra-species
KC129851	KC129784	0.999	10212	Bryozoa	Bugula neritina	10212	Bryozoa	Bugula neritina	Intra-species
KC129851	KC129779	1.006	10212	Bryozoa	Bugula neritina	10212	Bryozoa	Bugula neritina	Intra-species
KC129851	AF061420	1.03	10212	Bryozoa	Bugula neritina	10212	Bryozoa	Bugula neritina	Intra-species
KC129851	KC129724	0.999	10212	Bryozoa	Bugula neritina	10212	Bryozoa	Bugula neritina	Intra-species
KC129851	KC129729	0.999	10212	Bryozoa	Bugula neritina	10212	Bryozoa	Bugula neritina	Intra-species
KC129851	KC129758	1.006	10212	Bryozoa	Bugula neritina	10212	Bryozoa	Bugula neritina	Intra-species
KC129851	KC129836	0.98	10212	Bryozoa	Bugula neritina	10212	Bryozoa	Bugula neritina	Intra-species
KC129851	KC129749	1.006	10212	Bryozoa	Bugula neritina	10212	Bryozoa	Bugula neritina	Intra-species
KC129851	KC129812	0.999	10212	Bryozoa	Bugula neritina	10212	Bryozoa	Bugula neritina	Intra-species
KC129851	KC129816	0.999	10212	Bryozoa	Bugula neritina	10212	Bryozoa	Bugula neritina	Intra-species
KC129851	KC129788	0.999	10212	Bryozoa	Bugula neritina	10212	Bryozoa	Bugula neritina	Intra-species
KC129851	KC129767	0.999	10212	Bryozoa	Bugula neritina	10212	Bryozoa	Bugula neritina	Intra-species
KC129851	AF061425	1.018	10212	Bryozoa	Bugula neritina	10212	Bryozoa	Bugula neritina	Intra-species
KC129851	KC129759	1.023	10212	Bryozoa	Bugula neritina	10212	Bryozoa	Bugula neritina	Intra-species
KC129851	AF061431	0.997	10212	Bryozoa	Bugula neritina	10212	Bryozoa	Bugula neritina	Intra-species
KC129851	KC129792	1.023	10212	Bryozoa	Bugula neritina	10212	Bryozoa	Bugula neritina	Intra-species
KC129851	KC129737	1.006	10212	Bryozoa	Bugula neritina	10212	Bryozoa	Bugula neritina	Intra-species
KC129851	AF061418	0.997	10212	Bryozoa	Bugula neritina	10212	Bryozoa	Bugula neritina	Intra-species
KC129851	KC129775	1.023	10212	Bryozoa	Bugula neritina	10212	Bryozoa	Bugula neritina	Intra-species
KC129851	KC129726	1.023	10212	Bryozoa	Bugula neritina	10212	Bryozoa	Bugula neritina	Intra-species
KC129851	AF061427	1.03	10212	Bryozoa	Bugula neritina	10212	Bryozoa	Bugula neritina	Intra-species
KC129851	KC129820	1.027	10212	Bryozoa	Bugula neritina	10212	Bryozoa	Bugula neritina	Intra-species
KC129851	HQ896146	1.025	10212	Bryozoa	Bugula neritina	10212	Bryozoa	Bugula neritina	Intra-species
KC129851	HQ896145	1.025	10212	Bryozoa	Bugula neritina	10212	Bryozoa	Bugula neritina	Intra-species
KC129851	AF061419	1.03	10212	Bryozoa	Bugula neritina	10212	Bryozoa	Bugula neritina	Intra-species
KC129851	KC129782	0.999	10212	Bryozoa	Bugula neritina	10212	Bryozoa	Bugula neritina	Intra-species
KC129851	AF061424	0.979	10212	Bryozoa	Bugula neritina	10212	Bryozoa	Bugula neritina	Intra-species
KC129851	KC129791	0.999	10212	Bryozoa	Bugula neritina	10212	Bryozoa	Bugula neritina	Intra-species
KC129851	KC129821	1.023	10212	Bryozoa	Bugula neritina	10212	Bryozoa	Bugula neritina	Intra-species
KC129851	KC129842	0.98	10212	Bryozoa	Bugula neritina	10212	Bryozoa	Bugula neritina	Intra-species
KC129851	KC129750	1.006	10212	Bryozoa	Bugula neritina	10212	Bryozoa	Bugula neritina	Intra-species
KC129851	KC129743	1.006	10212	Bryozoa	Bugula neritina	10212	Bryozoa	Bugula neritina	Intra-species
KC129851	KC129817	0.999	10212	Bryozoa	Bugula neritina	10212	Bryozoa	Bugula neritina	Intra-species
KC129851	KC129805	0.999	10212	Bryozoa	Bugula neritina	10212	Bryozoa	Bugula neritina	Intra-species
KC129851	KC129813	0.999	10212	Bryozoa	Bugula neritina	10212	Bryozoa	Bugula neritina	Intra-species
KC129851	KC129839	0.974	10212	Bryozoa	Bugula neritina	10212	Bryozoa	Bugula neritina	Intra-species
KC129851	KC129845	0.983	10212	Bryozoa	Bugula neritina	10212	Bryozoa	Bugula neritina	Intra-species
KC129851	KC129751	1.006	10212	Bryozoa	Bugula neritina	10212	Bryozoa	Bugula neritina	Intra-species
KC129851	KC129745	0.999	10212	Bryozoa	Bugula neritina	10212	Bryozoa	Bugula neritina	Intra-species
KC129851	KC129826	1.006	10212	Bryozoa	Bugula neritina	10212	Bryozoa	Bugula neritina	Intra-species
KC129851	AF061423	1.03	10212	Bryozoa	Bugula neritina	10212	Bryozoa	Bugula neritina	Intra-species
KC129851	KC129734	1.01	10212	Bryozoa	Bugula neritina	10212	Bryozoa	Bugula neritina	Intra-species
KC129851	KC129764	0.999	10212	Bryozoa	Bugula neritina	10212	Bryozoa	Bugula neritina	Intra-species
KC129851	KC129837	0.98	10212	Bryozoa	Bugula neritina	10212	Bryozoa	Bugula neritina	Intra-species
KC129851	KC129801	0.999	10212	Bryozoa	Bugula neritina	10212	Bryozoa	Bugula neritina	Intra-species
KC129851	KC129769	0.999	10212	Bryozoa	Bugula neritina	10212	Bryozoa	Bugula neritina	Intra-species
KC129851	KC129790	1	10212	Bryozoa	Bugula neritina	10212	Bryozoa	Bugula neritina	Intra-species
KC129851	AF061426	0.982	10212	Bryozoa	Bugula neritina	10212	Bryozoa	Bugula neritina	Intra-species
KC129851	KC129757	1.006	10212	Bryozoa	Bugula neritina	10212	Bryozoa	Bugula neritina	Intra-species
KC129851	KC129827	1.006	10212	Bryozoa	Bugula neritina	10212	Bryozoa	Bugula neritina	Intra-species
KC129851	KC129806	0.999	10212	Bryozoa	Bugula neritina	10212	Bryozoa	Bugula neritina	Intra-species
KC129851	KC129756	1.006	10212	Bryozoa	Bugula neritina	10212	Bryozoa	Bugula neritina	Intra-species
KC129851	KC129725	1.023	10212	Bryozoa	Bugula neritina	10212	Bryozoa	Bugula neritina	Intra-species
KC129851	AF061421	1.03	10212	Bryozoa	Bugula neritina	10212	Bryozoa	Bugula neritina	Intra-species
KC129851	AF061432	0.993	10212	Bryozoa	Bugula neritina	10212	Bryozoa	Bugula neritina	Intra-species
KC129851	KC129833	0.98	10212	Bryozoa	Bugula neritina	10212	Bryozoa	Bugula neritina	Intra-species
KC129851	KC129733	1.033	10212	Bryozoa	Bugula neritina	10212	Bryozoa	Bugula neritina	Intra-species
KC129851	AF061422	0.992	10212	Bryozoa	Bugula neritina	10212	Bryozoa	Bugula neritina	Intra-species
KC129851	KC129809	0.999	10212	Bryozoa	Bugula neritina	10212	Bryozoa	Bugula neritina	Intra-species
KC129851	KC129808	0.999	10212	Bryozoa	Bugula neritina	10212	Bryozoa	Bugula neritina	Intra-species
KC129851	KC129774	0.999	10212	Bryozoa	Bugula neritina	10212	Bryozoa	Bugula neritina	Intra-species
KC129851	KC129727	0.999	10212	Bryozoa	Bugula neritina	10212	Bryozoa	Bugula neritina	Intra-species
KC129851	KC129740	1.006	10212	Bryozoa	Bugula neritina	10212	Bryozoa	Bugula neritina	Intra-species
KC129851	KC129763	1.006	10212	Bryozoa	Bugula neritina	10212	Bryozoa	Bugula neritina	Intra-species
KC129851	KC129762	1.023	10212	Bryozoa	Bugula neritina	10212	Bryozoa	Bugula neritina	Intra-species
KC129851	KC129843	0.98	10212	Bryozoa	Bugula neritina	10212	Bryozoa	Bugula neritina	Intra-species
KC129851	KC129768	0.999	10212	Bryozoa	Bugula neritina	10212	Bryozoa	Bugula neritina	Intra-species
KC129851	KC129746	0.999	10212	Bryozoa	Bugula neritina	10212	Bryozoa	Bugula neritina	Intra-species
KC129851	KC129828	1.006	10212	Bryozoa	Bugula neritina	10212	Bryozoa	Bugula neritina	Intra-species
KC129851	AF061430	0.997	10212	Bryozoa	Bugula neritina	10212	Bryozoa	Bugula neritina	Intra-species
KC129851	KC129811	1.006	10212	Bryozoa	Bugula neritina	10212	Bryozoa	Bugula neritina	Intra-species
KC129851	KC129771	0.999	10212	Bryozoa	Bugula neritina	10212	Bryozoa	Bugula neritina	Intra-species
KC129851	AF061429	1.03	10212	Bryozoa	Bugula neritina	10212	Bryozoa	Bugula neritina	Intra-species
KC129851	KC129766	1.006	10212	Bryozoa	Bugula neritina	10212	Bryozoa	Bugula neritina	Intra-species
KC129851	AF061417	0.997	10212	Bryozoa	Bugula neritina	10212	Bryozoa	Bugula neritina	Intra-species
KC129851	KC129795	1.014	10212	Bryozoa	Bugula neritina	10212	Bryozoa	Bugula neritina	Intra-species
KC129851	KC129723	0.999	10212	Bryozoa	Bugula neritina	10212	Bryozoa	Bugula neritina	Intra-species
KC129851	KC129741	1.006	10212	Bryozoa	Bugula neritina	10212	Bryozoa	Bugula neritina	Intra-species
KC129851	KC129736	1.006	10212	Bryozoa	Bugula neritina	10212	Bryozoa	Bugula neritina	Intra-species
KC129851	KC129834	0.971	10212	Bryozoa	Bugula neritina	10212	Bryozoa	Bugula neritina	Intra-species
KC129851	AY173426	1.012	10212	Bryozoa	Bugula neritina	10212	Bryozoa	Bugula neritina	Intra-species
KC129851	KC129832	1.006	10212	Bryozoa	Bugula neritina	10212	Bryozoa	Bugula neritina	Intra-species
KC129851	KC129754	0.999	10212	Bryozoa	Bugula neritina	10212	Bryozoa	Bugula neritina	Intra-species
KC129851	KC129847	0.999	10212	Bryozoa	Bugula neritina	10212	Bryozoa	Bugula neritina	Intra-species
KC129851	KC129803	0.999	10212	Bryozoa	Bugula neritina	10212	Bryozoa	Bugula neritina	Intra-species
KC129851	KC129730	1.024	10212	Bryozoa	Bugula neritina	10212	Bryozoa	Bugula neritina	Intra-species
KC129851	KC129760	1.023	10212	Bryozoa	Bugula neritina	10212	Bryozoa	Bugula neritina	Intra-species
KC129851	KC129822	1.006	10212	Bryozoa	Bugula neritina	10212	Bryozoa	Bugula neritina	Intra-species
KC129851	KC129780	0.999	10212	Bryozoa	Bugula neritina	10212	Bryozoa	Bugula neritina	Intra-species
KC129851	KC129824	1.006	10212	Bryozoa	Bugula neritina	10212	Bryozoa	Bugula neritina	Intra-species
KC129851	AF061428	0.979	10212	Bryozoa	Bugula neritina	10212	Bryozoa	Bugula neritina	Intra-species
KC129851	KC129789	0.999	10212	Bryozoa	Bugula neritina	10212	Bryozoa	Bugula neritina	Intra-species
KC129851	KC129753	1.006	10212	Bryozoa	Bugula neritina	10212	Bryozoa	Bugula neritina	Intra-species
KC129851	KC129798	1.006	10212	Bryozoa	Bugula neritina	10212	Bryozoa	Bugula neritina	Intra-species
KC129851	AY633485	1.007	10212	Bryozoa	Bugula neritina	10212	Bryozoa	Bugula neritina	Intra-species
KC129851	AY633486	1.037	10212	Bryozoa	Bugula neritina	10212	Bryozoa	Bugula neritina	Intra-species
KC129851	KC129783	0.999	10212	Bryozoa	Bugula neritina	10212	Bryozoa	Bugula neritina	Intra-species
KC129851	AY173425	1.012	10212	Bryozoa	Bugula neritina	10212	Bryozoa	Bugula neritina	Intra-species
KC129851	KC129800	1.006	10212	Bryozoa	Bugula neritina	10212	Bryozoa	Bugula neritina	Intra-species
KC129851	KC129830	1.006	10212	Bryozoa	Bugula neritina	10212	Bryozoa	Bugula neritina	Intra-species
KC129851	KC129738	1.006	10212	Bryozoa	Bugula neritina	10212	Bryozoa	Bugula neritina	Intra-species
KC129851	KC129797	0.999	10212	Bryozoa	Bugula neritina	10212	Bryozoa	Bugula neritina	Intra-species
KC129851	KC129755	0.999	10212	Bryozoa	Bugula neritina	10212	Bryozoa	Bugula neritina	Intra-species
KC129851	KC129722	0.999	10212	Bryozoa	Bugula neritina	10212	Bryozoa	Bugula neritina	Intra-species
KC129851	KC129772	0.999	10212	Bryozoa	Bugula neritina	10212	Bryozoa	Bugula neritina	Intra-species
KC129851	KC129781	0.999	10212	Bryozoa	Bugula neritina	10212	Bryozoa	Bugula neritina	Intra-species
KC129851	KC129825	1.006	10212	Bryozoa	Bugula neritina	10212	Bryozoa	Bugula neritina	Intra-species
KC129851	KC129846	0.999	10212	Bryozoa	Bugula neritina	10212	Bryozoa	Bugula neritina	Intra-species
KC129851	KC129777	0.999	10212	Bryozoa	Bugula neritina	10212	Bryozoa	Bugula neritina	Intra-species
KC129851	KC129810	1.006	10212	Bryozoa	Bugula neritina	10212	Bryozoa	Bugula neritina	Intra-species
KC129851	KC129829	1.006	10212	Bryozoa	Bugula neritina	10212	Bryozoa	Bugula neritina	Intra-species
KC129851	KC129731	1.035	10212	Bryozoa	Bugula neritina	10212	Bryozoa	Bugula neritina	Intra-species
KC129851	KC129804	1.029	10212	Bryozoa	Bugula neritina	10212	Bryozoa	Bugula neritina	Intra-species
KC129851	KC129770	0.999	10212	Bryozoa	Bugula neritina	10212	Bryozoa	Bugula neritina	Intra-species
KC129851	KC129838	0.98	10212	Bryozoa	Bugula neritina	10212	Bryozoa	Bugula neritina	Intra-species
KC129851	KC129796	1.006	10212	Bryozoa	Bugula neritina	10212	Bryozoa	Bugula neritina	Intra-species
KC129851	KC129742	1.006	10212	Bryozoa	Bugula neritina	10212	Bryozoa	Bugula neritina	Intra-species
KC129851	KC129802	0.999	10212	Bryozoa	Bugula neritina	10212	Bryozoa	Bugula neritina	Intra-species
KC129851	KC129739	1.006	10212	Bryozoa	Bugula neritina	10212	Bryozoa	Bugula neritina	Intra-species
KC129851	KC129823	1.006	10212	Bryozoa	Bugula neritina	10212	Bryozoa	Bugula neritina	Intra-species
KC129851	KC129735	1.006	10212	Bryozoa	Bugula neritina	10212	Bryozoa	Bugula neritina	Intra-species
KC129851	KC129815	0.999	10212	Bryozoa	Bugula neritina	10212	Bryozoa	Bugula neritina	Intra-species
KC129851	KC129765	1.023	10212	Bryozoa	Bugula neritina	10212	Bryozoa	Bugula neritina	Intra-species
KC129851	KC129748	1.006	10212	Bryozoa	Bugula neritina	10212	Bryozoa	Bugula neritina	Intra-species
KC129851	KC129732	1.032	10212	Bryozoa	Bugula neritina	10212	Bryozoa	Bugula neritina	Intra-species
KC129851	KC129835	0.98	10212	Bryozoa	Bugula neritina	10212	Bryozoa	Bugula neritina	Intra-species
KC129851	KC129793	0.999	10212	Bryozoa	Bugula neritina	10212	Bryozoa	Bugula neritina	Intra-species
KC129851	KC129794	0.999	10212	Bryozoa	Bugula neritina	10212	Bryozoa	Bugula neritina	Intra-species
KC129851	KC129844	0.974	10212	Bryozoa	Bugula neritina	10212	Bryozoa	Bugula neritina	Intra-species
KC129851	KC129840	0.98	10212	Bryozoa	Bugula neritina	10212	Bryozoa	Bugula neritina	Intra-species
KC129851	KC129787	0.999	10212	Bryozoa	Bugula neritina	10212	Bryozoa	Bugula neritina	Intra-species
KC129851	KC129786	1.023	10212	Bryozoa	Bugula neritina	10212	Bryozoa	Bugula neritina	Intra-species
KC129851	KC129721	0.999	10212	Bryozoa	Bugula neritina	10212	Bryozoa	Bugula neritina	Intra-species
KC129852	KC129737	1.006	10212	Bryozoa	Bugula neritina	10212	Bryozoa	Bugula neritina	Intra-species
KC129852	KC129812	0.999	10212	Bryozoa	Bugula neritina	10212	Bryozoa	Bugula neritina	Intra-species
KC129852	KC129735	1.006	10212	Bryozoa	Bugula neritina	10212	Bryozoa	Bugula neritina	Intra-species
KC129852	KC129732	1.032	10212	Bryozoa	Bugula neritina	10212	Bryozoa	Bugula neritina	Intra-species
KC129852	KC129801	0.999	10212	Bryozoa	Bugula neritina	10212	Bryozoa	Bugula neritina	Intra-species
KC129852	KC129745	0.999	10212	Bryozoa	Bugula neritina	10212	Bryozoa	Bugula neritina	Intra-species
KC129852	KC129817	0.999	10212	Bryozoa	Bugula neritina	10212	Bryozoa	Bugula neritina	Intra-species
KC129852	AF061420	1.03	10212	Bryozoa	Bugula neritina	10212	Bryozoa	Bugula neritina	Intra-species
KC129852	AY173426	1.012	10212	Bryozoa	Bugula neritina	10212	Bryozoa	Bugula neritina	Intra-species
KC129852	KC129734	1.01	10212	Bryozoa	Bugula neritina	10212	Bryozoa	Bugula neritina	Intra-species
KC129852	KC129781	0.999	10212	Bryozoa	Bugula neritina	10212	Bryozoa	Bugula neritina	Intra-species
KC129852	KC129800	1.006	10212	Bryozoa	Bugula neritina	10212	Bryozoa	Bugula neritina	Intra-species
KC129852	KC129825	1.006	10212	Bryozoa	Bugula neritina	10212	Bryozoa	Bugula neritina	Intra-species
KC129852	KC129789	0.999	10212	Bryozoa	Bugula neritina	10212	Bryozoa	Bugula neritina	Intra-species
KC129852	KC129762	1.023	10212	Bryozoa	Bugula neritina	10212	Bryozoa	Bugula neritina	Intra-species
KC129852	KC129811	1.006	10212	Bryozoa	Bugula neritina	10212	Bryozoa	Bugula neritina	Intra-species
KC129852	HQ896146	1.025	10212	Bryozoa	Bugula neritina	10212	Bryozoa	Bugula neritina	Intra-species
KC129852	KC129841	0.98	10212	Bryozoa	Bugula neritina	10212	Bryozoa	Bugula neritina	Intra-species
KC129852	KC129727	0.999	10212	Bryozoa	Bugula neritina	10212	Bryozoa	Bugula neritina	Intra-species
KC129852	AF061430	0.997	10212	Bryozoa	Bugula neritina	10212	Bryozoa	Bugula neritina	Intra-species
KC129852	KC129782	0.999	10212	Bryozoa	Bugula neritina	10212	Bryozoa	Bugula neritina	Intra-species
KC129852	KC129731	1.035	10212	Bryozoa	Bugula neritina	10212	Bryozoa	Bugula neritina	Intra-species
KC129852	KC129827	1.006	10212	Bryozoa	Bugula neritina	10212	Bryozoa	Bugula neritina	Intra-species
KC129852	KC129816	0.999	10212	Bryozoa	Bugula neritina	10212	Bryozoa	Bugula neritina	Intra-species
KC129852	KC129766	1.006	10212	Bryozoa	Bugula neritina	10212	Bryozoa	Bugula neritina	Intra-species
KC129852	KC129820	1.027	10212	Bryozoa	Bugula neritina	10212	Bryozoa	Bugula neritina	Intra-species
KC129852	KC129763	1.006	10212	Bryozoa	Bugula neritina	10212	Bryozoa	Bugula neritina	Intra-species
KC129852	AF061417	0.997	10212	Bryozoa	Bugula neritina	10212	Bryozoa	Bugula neritina	Intra-species
KC129852	KC129837	0.98	10212	Bryozoa	Bugula neritina	10212	Bryozoa	Bugula neritina	Intra-species
KC129852	KC129767	0.999	10212	Bryozoa	Bugula neritina	10212	Bryozoa	Bugula neritina	Intra-species
KC129852	KC129776	1.001	10212	Bryozoa	Bugula neritina	10212	Bryozoa	Bugula neritina	Intra-species
KC129852	KC129783	0.999	10212	Bryozoa	Bugula neritina	10212	Bryozoa	Bugula neritina	Intra-species
KC129852	KC129722	0.999	10212	Bryozoa	Bugula neritina	10212	Bryozoa	Bugula neritina	Intra-species
KC129852	KC129723	0.999	10212	Bryozoa	Bugula neritina	10212	Bryozoa	Bugula neritina	Intra-species
KC129852	KC129810	1.006	10212	Bryozoa	Bugula neritina	10212	Bryozoa	Bugula neritina	Intra-species
KC129852	KC129769	0.999	10212	Bryozoa	Bugula neritina	10212	Bryozoa	Bugula neritina	Intra-species
KC129852	KC129748	1.006	10212	Bryozoa	Bugula neritina	10212	Bryozoa	Bugula neritina	Intra-species
KC129852	AF061424	0.979	10212	Bryozoa	Bugula neritina	10212	Bryozoa	Bugula neritina	Intra-species
KC129852	KC129819	1.001	10212	Bryozoa	Bugula neritina	10212	Bryozoa	Bugula neritina	Intra-species
KC129852	KC129844	0.974	10212	Bryozoa	Bugula neritina	10212	Bryozoa	Bugula neritina	Intra-species
KC129852	KC129832	1.006	10212	Bryozoa	Bugula neritina	10212	Bryozoa	Bugula neritina	Intra-species
KC129852	KC129770	0.999	10212	Bryozoa	Bugula neritina	10212	Bryozoa	Bugula neritina	Intra-species
KC129852	KC129729	0.999	10212	Bryozoa	Bugula neritina	10212	Bryozoa	Bugula neritina	Intra-species
KC129852	KC129764	0.999	10212	Bryozoa	Bugula neritina	10212	Bryozoa	Bugula neritina	Intra-species
KC129852	KC129765	1.023	10212	Bryozoa	Bugula neritina	10212	Bryozoa	Bugula neritina	Intra-species
KC129852	KC129790	1	10212	Bryozoa	Bugula neritina	10212	Bryozoa	Bugula neritina	Intra-species
KC129852	KC129814	0.999	10212	Bryozoa	Bugula neritina	10212	Bryozoa	Bugula neritina	Intra-species
KC129852	KC129795	1.014	10212	Bryozoa	Bugula neritina	10212	Bryozoa	Bugula neritina	Intra-species
KC129852	KC129813	0.999	10212	Bryozoa	Bugula neritina	10212	Bryozoa	Bugula neritina	Intra-species
KC129852	KC129730	1.024	10212	Bryozoa	Bugula neritina	10212	Bryozoa	Bugula neritina	Intra-species
KC129852	KC129784	0.999	10212	Bryozoa	Bugula neritina	10212	Bryozoa	Bugula neritina	Intra-species
KC129852	KC129809	0.999	10212	Bryozoa	Bugula neritina	10212	Bryozoa	Bugula neritina	Intra-species
KC129852	AY633486	1.037	10212	Bryozoa	Bugula neritina	10212	Bryozoa	Bugula neritina	Intra-species
KC129852	KC129760	1.023	10212	Bryozoa	Bugula neritina	10212	Bryozoa	Bugula neritina	Intra-species
KC129852	KC129756	1.006	10212	Bryozoa	Bugula neritina	10212	Bryozoa	Bugula neritina	Intra-species
KC129852	KC129830	1.006	10212	Bryozoa	Bugula neritina	10212	Bryozoa	Bugula neritina	Intra-species
KC129852	AF061419	1.03	10212	Bryozoa	Bugula neritina	10212	Bryozoa	Bugula neritina	Intra-species
KC129852	AF061421	1.03	10212	Bryozoa	Bugula neritina	10212	Bryozoa	Bugula neritina	Intra-species
KC129852	KC129834	0.971	10212	Bryozoa	Bugula neritina	10212	Bryozoa	Bugula neritina	Intra-species
KC129852	KC129842	0.98	10212	Bryozoa	Bugula neritina	10212	Bryozoa	Bugula neritina	Intra-species
KC129852	KC129846	0.999	10212	Bryozoa	Bugula neritina	10212	Bryozoa	Bugula neritina	Intra-species
KC129852	AF061426	0.982	10212	Bryozoa	Bugula neritina	10212	Bryozoa	Bugula neritina	Intra-species
KC129852	AF061418	0.997	10212	Bryozoa	Bugula neritina	10212	Bryozoa	Bugula neritina	Intra-species
KC129852	KC129740	1.006	10212	Bryozoa	Bugula neritina	10212	Bryozoa	Bugula neritina	Intra-species
KC129852	AY173425	1.012	10212	Bryozoa	Bugula neritina	10212	Bryozoa	Bugula neritina	Intra-species
KC129852	KC129753	1.006	10212	Bryozoa	Bugula neritina	10212	Bryozoa	Bugula neritina	Intra-species
KC129852	KC129787	0.999	10212	Bryozoa	Bugula neritina	10212	Bryozoa	Bugula neritina	Intra-species
KC129852	KC129739	1.006	10212	Bryozoa	Bugula neritina	10212	Bryozoa	Bugula neritina	Intra-species
KC129852	AF061431	0.997	10212	Bryozoa	Bugula neritina	10212	Bryozoa	Bugula neritina	Intra-species
KC129852	KC129822	1.006	10212	Bryozoa	Bugula neritina	10212	Bryozoa	Bugula neritina	Intra-species
KC129852	KC129752	1.006	10212	Bryozoa	Bugula neritina	10212	Bryozoa	Bugula neritina	Intra-species
KC129852	KC129736	1.006	10212	Bryozoa	Bugula neritina	10212	Bryozoa	Bugula neritina	Intra-species
KC129852	KC129828	1.006	10212	Bryozoa	Bugula neritina	10212	Bryozoa	Bugula neritina	Intra-species
KC129852	KC129747	1.006	10212	Bryozoa	Bugula neritina	10212	Bryozoa	Bugula neritina	Intra-species
KC129852	KC129838	0.98	10212	Bryozoa	Bugula neritina	10212	Bryozoa	Bugula neritina	Intra-species
KC129852	KC129780	0.999	10212	Bryozoa	Bugula neritina	10212	Bryozoa	Bugula neritina	Intra-species
KC129852	KC129805	0.999	10212	Bryozoa	Bugula neritina	10212	Bryozoa	Bugula neritina	Intra-species
KC129852	KC129843	0.98	10212	Bryozoa	Bugula neritina	10212	Bryozoa	Bugula neritina	Intra-species
KC129852	KC129792	1.023	10212	Bryozoa	Bugula neritina	10212	Bryozoa	Bugula neritina	Intra-species
KC129852	KC129738	1.006	10212	Bryozoa	Bugula neritina	10212	Bryozoa	Bugula neritina	Intra-species
KC129852	KC129768	0.999	10212	Bryozoa	Bugula neritina	10212	Bryozoa	Bugula neritina	Intra-species
KC129852	KC129802	0.999	10212	Bryozoa	Bugula neritina	10212	Bryozoa	Bugula neritina	Intra-species
KC129852	KC129728	1.023	10212	Bryozoa	Bugula neritina	10212	Bryozoa	Bugula neritina	Intra-species
KC129852	KC129757	1.006	10212	Bryozoa	Bugula neritina	10212	Bryozoa	Bugula neritina	Intra-species
KC129852	KC129793	0.999	10212	Bryozoa	Bugula neritina	10212	Bryozoa	Bugula neritina	Intra-species
KC129852	KC129733	1.033	10212	Bryozoa	Bugula neritina	10212	Bryozoa	Bugula neritina	Intra-species
KC129852	KC129845	0.983	10212	Bryozoa	Bugula neritina	10212	Bryozoa	Bugula neritina	Intra-species
KC129852	KC129835	0.98	10212	Bryozoa	Bugula neritina	10212	Bryozoa	Bugula neritina	Intra-species
KC129852	KC129744	0.999	10212	Bryozoa	Bugula neritina	10212	Bryozoa	Bugula neritina	Intra-species
KC129852	KC129742	1.006	10212	Bryozoa	Bugula neritina	10212	Bryozoa	Bugula neritina	Intra-species
KC129852	AF061423	1.03	10212	Bryozoa	Bugula neritina	10212	Bryozoa	Bugula neritina	Intra-species
KC129852	KC129806	0.999	10212	Bryozoa	Bugula neritina	10212	Bryozoa	Bugula neritina	Intra-species
KC129852	KC129799	1.008	10212	Bryozoa	Bugula neritina	10212	Bryozoa	Bugula neritina	Intra-species
KC129852	HQ896145	1.025	10212	Bryozoa	Bugula neritina	10212	Bryozoa	Bugula neritina	Intra-species
KC129852	AF061429	1.03	10212	Bryozoa	Bugula neritina	10212	Bryozoa	Bugula neritina	Intra-species
KC129852	KC129818	0.999	10212	Bryozoa	Bugula neritina	10212	Bryozoa	Bugula neritina	Intra-species
KC129852	KC129788	0.999	10212	Bryozoa	Bugula neritina	10212	Bryozoa	Bugula neritina	Intra-species
KC129852	KC129749	1.006	10212	Bryozoa	Bugula neritina	10212	Bryozoa	Bugula neritina	Intra-species
KC129852	KC129824	1.006	10212	Bryozoa	Bugula neritina	10212	Bryozoa	Bugula neritina	Intra-species
KC129852	KC129785	0.999	10212	Bryozoa	Bugula neritina	10212	Bryozoa	Bugula neritina	Intra-species
KC129852	KC129724	0.999	10212	Bryozoa	Bugula neritina	10212	Bryozoa	Bugula neritina	Intra-species
KC129852	AF061428	0.979	10212	Bryozoa	Bugula neritina	10212	Bryozoa	Bugula neritina	Intra-species
KC129852	KC129839	0.974	10212	Bryozoa	Bugula neritina	10212	Bryozoa	Bugula neritina	Intra-species
KC129852	KC129847	0.999	10212	Bryozoa	Bugula neritina	10212	Bryozoa	Bugula neritina	Intra-species
KC129852	KC129815	0.999	10212	Bryozoa	Bugula neritina	10212	Bryozoa	Bugula neritina	Intra-species
KC129852	KC129829	1.006	10212	Bryozoa	Bugula neritina	10212	Bryozoa	Bugula neritina	Intra-species
KC129852	KC129743	1.006	10212	Bryozoa	Bugula neritina	10212	Bryozoa	Bugula neritina	Intra-species
KC129852	KC129794	0.999	10212	Bryozoa	Bugula neritina	10212	Bryozoa	Bugula neritina	Intra-species
KC129852	AY633485	1.007	10212	Bryozoa	Bugula neritina	10212	Bryozoa	Bugula neritina	Intra-species
KC129852	KC129777	0.999	10212	Bryozoa	Bugula neritina	10212	Bryozoa	Bugula neritina	Intra-species
KC129852	KC129840	0.98	10212	Bryozoa	Bugula neritina	10212	Bryozoa	Bugula neritina	Intra-species
KC129852	KC129774	0.999	10212	Bryozoa	Bugula neritina	10212	Bryozoa	Bugula neritina	Intra-species
KC129852	KC129741	1.006	10212	Bryozoa	Bugula neritina	10212	Bryozoa	Bugula neritina	Intra-species
KC129852	KC129823	1.006	10212	Bryozoa	Bugula neritina	10212	Bryozoa	Bugula neritina	Intra-species
KC129852	KC129746	0.999	10212	Bryozoa	Bugula neritina	10212	Bryozoa	Bugula neritina	Intra-species
KC129852	KC129771	0.999	10212	Bryozoa	Bugula neritina	10212	Bryozoa	Bugula neritina	Intra-species
KC129852	KC129831	1.006	10212	Bryozoa	Bugula neritina	10212	Bryozoa	Bugula neritina	Intra-species
KC129852	KC129759	1.023	10212	Bryozoa	Bugula neritina	10212	Bryozoa	Bugula neritina	Intra-species
KC129852	KC129778	1.023	10212	Bryozoa	Bugula neritina	10212	Bryozoa	Bugula neritina	Intra-species
KC129852	KC129796	1.006	10212	Bryozoa	Bugula neritina	10212	Bryozoa	Bugula neritina	Intra-species
KC129852	KC129797	0.999	10212	Bryozoa	Bugula neritina	10212	Bryozoa	Bugula neritina	Intra-species
KC129852	KC129833	0.98	10212	Bryozoa	Bugula neritina	10212	Bryozoa	Bugula neritina	Intra-species
KC129852	AF061427	1.03	10212	Bryozoa	Bugula neritina	10212	Bryozoa	Bugula neritina	Intra-species
KC129852	KC129821	1.023	10212	Bryozoa	Bugula neritina	10212	Bryozoa	Bugula neritina	Intra-species
KC129852	KC129726	1.023	10212	Bryozoa	Bugula neritina	10212	Bryozoa	Bugula neritina	Intra-species
KC129852	KC129786	1.023	10212	Bryozoa	Bugula neritina	10212	Bryozoa	Bugula neritina	Intra-species
KC129852	KC129798	1.006	10212	Bryozoa	Bugula neritina	10212	Bryozoa	Bugula neritina	Intra-species
KC129852	KC129725	1.023	10212	Bryozoa	Bugula neritina	10212	Bryozoa	Bugula neritina	Intra-species
KC129852	KC129721	0.999	10212	Bryozoa	Bugula neritina	10212	Bryozoa	Bugula neritina	Intra-species
KC129852	KC129755	0.999	10212	Bryozoa	Bugula neritina	10212	Bryozoa	Bugula neritina	Intra-species
KC129852	KC129807	0.999	10212	Bryozoa	Bugula neritina	10212	Bryozoa	Bugula neritina	Intra-species
KC129852	KC129803	0.999	10212	Bryozoa	Bugula neritina	10212	Bryozoa	Bugula neritina	Intra-species
KC129852	KC129754	0.999	10212	Bryozoa	Bugula neritina	10212	Bryozoa	Bugula neritina	Intra-species
KC129852	KC129761	1.013	10212	Bryozoa	Bugula neritina	10212	Bryozoa	Bugula neritina	Intra-species
KC129852	KC129775	1.023	10212	Bryozoa	Bugula neritina	10212	Bryozoa	Bugula neritina	Intra-species
KC129852	AF061422	0.992	10212	Bryozoa	Bugula neritina	10212	Bryozoa	Bugula neritina	Intra-species
KC129852	KC129751	1.006	10212	Bryozoa	Bugula neritina	10212	Bryozoa	Bugula neritina	Intra-species
KC129852	KC129772	0.999	10212	Bryozoa	Bugula neritina	10212	Bryozoa	Bugula neritina	Intra-species
KC129852	KC129750	1.006	10212	Bryozoa	Bugula neritina	10212	Bryozoa	Bugula neritina	Intra-species
KC129852	KC129826	1.006	10212	Bryozoa	Bugula neritina	10212	Bryozoa	Bugula neritina	Intra-species
KC129852	AF061425	1.018	10212	Bryozoa	Bugula neritina	10212	Bryozoa	Bugula neritina	Intra-species
KC129852	AF061432	0.993	10212	Bryozoa	Bugula neritina	10212	Bryozoa	Bugula neritina	Intra-species
KC129852	KC129791	0.999	10212	Bryozoa	Bugula neritina	10212	Bryozoa	Bugula neritina	Intra-species
KC129852	KC129836	0.98	10212	Bryozoa	Bugula neritina	10212	Bryozoa	Bugula neritina	Intra-species
KC129852	KC129758	1.006	10212	Bryozoa	Bugula neritina	10212	Bryozoa	Bugula neritina	Intra-species
KC129852	KC129779	1.006	10212	Bryozoa	Bugula neritina	10212	Bryozoa	Bugula neritina	Intra-species
KC129852	KC129804	1.029	10212	Bryozoa	Bugula neritina	10212	Bryozoa	Bugula neritina	Intra-species
KC129852	KC129773	1.023	10212	Bryozoa	Bugula neritina	10212	Bryozoa	Bugula neritina	Intra-species
KC129852	KC129808	0.999	10212	Bryozoa	Bugula neritina	10212	Bryozoa	Bugula neritina	Intra-species
KC129853	KC129841	0.98	10212	Bryozoa	Bugula neritina	10212	Bryozoa	Bugula neritina	Intra-species
KC129853	KC129825	0.993	10212	Bryozoa	Bugula neritina	10212	Bryozoa	Bugula neritina	Intra-species
KC129853	KC129845	0.977	10212	Bryozoa	Bugula neritina	10212	Bryozoa	Bugula neritina	Intra-species
KC129853	KC129757	1.009	10212	Bryozoa	Bugula neritina	10212	Bryozoa	Bugula neritina	Intra-species
KC129853	KC129806	1.001	10212	Bryozoa	Bugula neritina	10212	Bryozoa	Bugula neritina	Intra-species
KC129853	AF061417	0.988	10212	Bryozoa	Bugula neritina	10212	Bryozoa	Bugula neritina	Intra-species
KC129853	AF061421	1.035	10212	Bryozoa	Bugula neritina	10212	Bryozoa	Bugula neritina	Intra-species
KC129853	KC129832	1.009	10212	Bryozoa	Bugula neritina	10212	Bryozoa	Bugula neritina	Intra-species
KC129853	KC129835	0.98	10212	Bryozoa	Bugula neritina	10212	Bryozoa	Bugula neritina	Intra-species
KC129853	KC129794	1.001	10212	Bryozoa	Bugula neritina	10212	Bryozoa	Bugula neritina	Intra-species
KC129853	KC129772	1.001	10212	Bryozoa	Bugula neritina	10212	Bryozoa	Bugula neritina	Intra-species
KC129853	KC129763	1.009	10212	Bryozoa	Bugula neritina	10212	Bryozoa	Bugula neritina	Intra-species
KC129853	KC129780	1.001	10212	Bryozoa	Bugula neritina	10212	Bryozoa	Bugula neritina	Intra-species
KC129853	KC129731	1.026	10212	Bryozoa	Bugula neritina	10212	Bryozoa	Bugula neritina	Intra-species
KC129853	KC129829	1.009	10212	Bryozoa	Bugula neritina	10212	Bryozoa	Bugula neritina	Intra-species
KC129853	KC129821	1.027	10212	Bryozoa	Bugula neritina	10212	Bryozoa	Bugula neritina	Intra-species
KC129853	KC129725	1.027	10212	Bryozoa	Bugula neritina	10212	Bryozoa	Bugula neritina	Intra-species
KC129853	KC129842	0.98	10212	Bryozoa	Bugula neritina	10212	Bryozoa	Bugula neritina	Intra-species
KC129853	KC129818	1.001	10212	Bryozoa	Bugula neritina	10212	Bryozoa	Bugula neritina	Intra-species
KC129853	KC129759	1.027	10212	Bryozoa	Bugula neritina	10212	Bryozoa	Bugula neritina	Intra-species
KC129853	KC129752	1.009	10212	Bryozoa	Bugula neritina	10212	Bryozoa	Bugula neritina	Intra-species
KC129853	KC129811	0.993	10212	Bryozoa	Bugula neritina	10212	Bryozoa	Bugula neritina	Intra-species
KC129853	AY633486	1.037	10212	Bryozoa	Bugula neritina	10212	Bryozoa	Bugula neritina	Intra-species
KC129853	KC129828	1.009	10212	Bryozoa	Bugula neritina	10212	Bryozoa	Bugula neritina	Intra-species
KC129853	KC129734	0.991	10212	Bryozoa	Bugula neritina	10212	Bryozoa	Bugula neritina	Intra-species
KC129853	KC129792	1.027	10212	Bryozoa	Bugula neritina	10212	Bryozoa	Bugula neritina	Intra-species
KC129853	KC129846	1.001	10212	Bryozoa	Bugula neritina	10212	Bryozoa	Bugula neritina	Intra-species
KC129853	KC129837	0.98	10212	Bryozoa	Bugula neritina	10212	Bryozoa	Bugula neritina	Intra-species
KC129853	KC129756	1.009	10212	Bryozoa	Bugula neritina	10212	Bryozoa	Bugula neritina	Intra-species
KC129853	KC129771	1.001	10212	Bryozoa	Bugula neritina	10212	Bryozoa	Bugula neritina	Intra-species
KC129853	KC129801	1.001	10212	Bryozoa	Bugula neritina	10212	Bryozoa	Bugula neritina	Intra-species
KC129853	KC129834	0.971	10212	Bryozoa	Bugula neritina	10212	Bryozoa	Bugula neritina	Intra-species
KC129853	KC129840	0.98	10212	Bryozoa	Bugula neritina	10212	Bryozoa	Bugula neritina	Intra-species
KC129853	KC129838	0.98	10212	Bryozoa	Bugula neritina	10212	Bryozoa	Bugula neritina	Intra-species
KC129853	KC129737	1.009	10212	Bryozoa	Bugula neritina	10212	Bryozoa	Bugula neritina	Intra-species
KC129853	KC129817	1.001	10212	Bryozoa	Bugula neritina	10212	Bryozoa	Bugula neritina	Intra-species
KC129853	KC129760	1.027	10212	Bryozoa	Bugula neritina	10212	Bryozoa	Bugula neritina	Intra-species
KC129853	KC129761	1.017	10212	Bryozoa	Bugula neritina	10212	Bryozoa	Bugula neritina	Intra-species
KC129853	KC129779	1.009	10212	Bryozoa	Bugula neritina	10212	Bryozoa	Bugula neritina	Intra-species
KC129853	KC129746	1.001	10212	Bryozoa	Bugula neritina	10212	Bryozoa	Bugula neritina	Intra-species
KC129853	KC129739	1.009	10212	Bryozoa	Bugula neritina	10212	Bryozoa	Bugula neritina	Intra-species
KC129853	KC129722	1.001	10212	Bryozoa	Bugula neritina	10212	Bryozoa	Bugula neritina	Intra-species
KC129853	AF061422	0.981	10212	Bryozoa	Bugula neritina	10212	Bryozoa	Bugula neritina	Intra-species
KC129853	KC129750	1.009	10212	Bryozoa	Bugula neritina	10212	Bryozoa	Bugula neritina	Intra-species
KC129853	HQ896145	1.025	10212	Bryozoa	Bugula neritina	10212	Bryozoa	Bugula neritina	Intra-species
KC129853	KC129812	0.993	10212	Bryozoa	Bugula neritina	10212	Bryozoa	Bugula neritina	Intra-species
KC129853	KC129836	0.98	10212	Bryozoa	Bugula neritina	10212	Bryozoa	Bugula neritina	Intra-species
KC129853	KC129814	1.001	10212	Bryozoa	Bugula neritina	10212	Bryozoa	Bugula neritina	Intra-species
KC129853	KC129769	1.001	10212	Bryozoa	Bugula neritina	10212	Bryozoa	Bugula neritina	Intra-species
KC129853	AF061425	1.021	10212	Bryozoa	Bugula neritina	10212	Bryozoa	Bugula neritina	Intra-species
KC129853	KC129747	1.009	10212	Bryozoa	Bugula neritina	10212	Bryozoa	Bugula neritina	Intra-species
KC129853	KC129753	1.009	10212	Bryozoa	Bugula neritina	10212	Bryozoa	Bugula neritina	Intra-species
KC129853	KC129770	1.001	10212	Bryozoa	Bugula neritina	10212	Bryozoa	Bugula neritina	Intra-species
KC129853	AY173426	1.001	10212	Bryozoa	Bugula neritina	10212	Bryozoa	Bugula neritina	Intra-species
KC129853	AY633485	1.01	10212	Bryozoa	Bugula neritina	10212	Bryozoa	Bugula neritina	Intra-species
KC129853	KC129808	1.001	10212	Bryozoa	Bugula neritina	10212	Bryozoa	Bugula neritina	Intra-species
KC129853	KC129790	1.003	10212	Bryozoa	Bugula neritina	10212	Bryozoa	Bugula neritina	Intra-species
KC129853	AF061430	0.988	10212	Bryozoa	Bugula neritina	10212	Bryozoa	Bugula neritina	Intra-species
KC129853	KC129775	1.027	10212	Bryozoa	Bugula neritina	10212	Bryozoa	Bugula neritina	Intra-species
KC129853	KC129754	1.001	10212	Bryozoa	Bugula neritina	10212	Bryozoa	Bugula neritina	Intra-species
KC129853	KC129738	1.009	10212	Bryozoa	Bugula neritina	10212	Bryozoa	Bugula neritina	Intra-species
KC129853	KC129765	1.027	10212	Bryozoa	Bugula neritina	10212	Bryozoa	Bugula neritina	Intra-species
KC129853	KC129831	1.009	10212	Bryozoa	Bugula neritina	10212	Bryozoa	Bugula neritina	Intra-species
KC129853	AF061428	0.972	10212	Bryozoa	Bugula neritina	10212	Bryozoa	Bugula neritina	Intra-species
KC129853	KC129796	1.009	10212	Bryozoa	Bugula neritina	10212	Bryozoa	Bugula neritina	Intra-species
KC129853	KC129823	1.009	10212	Bryozoa	Bugula neritina	10212	Bryozoa	Bugula neritina	Intra-species
KC129853	KC129802	1.001	10212	Bryozoa	Bugula neritina	10212	Bryozoa	Bugula neritina	Intra-species
KC129853	KC129730	1.026	10212	Bryozoa	Bugula neritina	10212	Bryozoa	Bugula neritina	Intra-species
KC129853	KC129822	1.009	10212	Bryozoa	Bugula neritina	10212	Bryozoa	Bugula neritina	Intra-species
KC129853	KC129793	1.001	10212	Bryozoa	Bugula neritina	10212	Bryozoa	Bugula neritina	Intra-species
KC129853	KC129800	1.009	10212	Bryozoa	Bugula neritina	10212	Bryozoa	Bugula neritina	Intra-species
KC129853	KC129749	1.009	10212	Bryozoa	Bugula neritina	10212	Bryozoa	Bugula neritina	Intra-species
[truncated: 33,617 more rows]

## Sheet: BOLD_barcodingGap_problem
Seq1	bin1	phylum1	species1	Seq2	bin2	phylum2	species2	Distance	Type
11724408	BOLD:ADW1585	Cnidaria	Aegina citrea	13766512	BOLD:AEG5046	Cnidaria	Aegina citrea	0.451	Intra-species
11724415	BOLD:ADW1585	Cnidaria	Aegina citrea	13766512	BOLD:AEG5046	Cnidaria	Aegina citrea	0.46	Intra-species
11724414	BOLD:ADW1585	Cnidaria	Aegina citrea	13766512	BOLD:AEG5046	Cnidaria	Aegina citrea	0.463	Intra-species
11724417	BOLD:ADW1585	Cnidaria	Aegina citrea	13766512	BOLD:AEG5046	Cnidaria	Aegina citrea	0.454	Intra-species
11724409	BOLD:ADW1585	Cnidaria	Aegina citrea	13766512	BOLD:AEG5046	Cnidaria	Aegina citrea	0.455	Intra-species
11724416	BOLD:ADW1585	Cnidaria	Aegina citrea	13766512	BOLD:AEG5046	Cnidaria	Aegina citrea	0.455	Intra-species
13766512	BOLD:AEG5046	Cnidaria	Aegina citrea	23829020	BOLD:ADW1585	Cnidaria	Aegina citrea	0.455	Intra-species
11762787	BOLD:AAD2483	Bryozoa	Bugula neritina	4734847	BOLD:AAD2484	Bryozoa	Bugula neritina	0.52	Intra-species
11762799	BOLD:AAD2483	Bryozoa	Bugula neritina	4734847	BOLD:AAD2484	Bryozoa	Bugula neritina	0.52	Intra-species
4711257	BOLD:AAD2483	Bryozoa	Bugula neritina	4734847	BOLD:AAD2484	Bryozoa	Bugula neritina	0.52	Intra-species
3143581	BOLD:AAD2482	Bryozoa	Bugula neritina	4734847	BOLD:AAD2484	Bryozoa	Bugula neritina	0.52	Intra-species
3143593	BOLD:AAD2482	Bryozoa	Bugula neritina	4734847	BOLD:AAD2484	Bryozoa	Bugula neritina	0.52	Intra-species
4714745	BOLD:AAD2484	Bryozoa	Bugula neritina	4734847	BOLD:AAD2484	Bryozoa	Bugula neritina	0.404	Intra-species
4711275	BOLD:AAD2483	Bryozoa	Bugula neritina	4734847	BOLD:AAD2484	Bryozoa	Bugula neritina	0.52	Intra-species
21039836	BOLD:AAD2483	Bryozoa	Bugula neritina	4734847	BOLD:AAD2484	Bryozoa	Bugula neritina	0.52	Intra-species
3143587	BOLD:AAD2482	Bryozoa	Bugula neritina	4734847	BOLD:AAD2484	Bryozoa	Bugula neritina	0.52	Intra-species
4714772	BOLD:AAD2483	Bryozoa	Bugula neritina	4734847	BOLD:AAD2484	Bryozoa	Bugula neritina	0.52	Intra-species
11762794	BOLD:AAD2483	Bryozoa	Bugula neritina	4734847	BOLD:AAD2484	Bryozoa	Bugula neritina	0.52	Intra-species
4714731	BOLD:AAD2482	Bryozoa	Bugula neritina	4734847	BOLD:AAD2484	Bryozoa	Bugula neritina	0.52	Intra-species
4711271	BOLD:AAD2483	Bryozoa	Bugula neritina	4734847	BOLD:AAD2484	Bryozoa	Bugula neritina	0.52	Intra-species
4714728	BOLD:AAD2482	Bryozoa	Bugula neritina	4734847	BOLD:AAD2484	Bryozoa	Bugula neritina	0.52	Intra-species
4714750	BOLD:AAD2483	Bryozoa	Bugula neritina	4734847	BOLD:AAD2484	Bryozoa	Bugula neritina	0.52	Intra-species
4711249	BOLD:AAD2483	Bryozoa	Bugula neritina	4734847	BOLD:AAD2484	Bryozoa	Bugula neritina	0.52	Intra-species
4714738	BOLD:AAD2483	Bryozoa	Bugula neritina	4734847	BOLD:AAD2484	Bryozoa	Bugula neritina	0.52	Intra-species
11762780	BOLD:AAD2483	Bryozoa	Bugula neritina	4734847	BOLD:AAD2484	Bryozoa	Bugula neritina	0.52	Intra-species
4711288	BOLD:AAD2483	Bryozoa	Bugula neritina	4734847	BOLD:AAD2484	Bryozoa	Bugula neritina	0.52	Intra-species
3143596	BOLD:AAD2483	Bryozoa	Bugula neritina	4734847	BOLD:AAD2484	Bryozoa	Bugula neritina	0.52	Intra-species
11762792	BOLD:AAD2483	Bryozoa	Bugula neritina	4734847	BOLD:AAD2484	Bryozoa	Bugula neritina	0.52	Intra-species
4711259	BOLD:AAD2483	Bryozoa	Bugula neritina	4734847	BOLD:AAD2484	Bryozoa	Bugula neritina	0.52	Intra-species
11762797	BOLD:AAD2483	Bryozoa	Bugula neritina	4734847	BOLD:AAD2484	Bryozoa	Bugula neritina	0.52	Intra-species
4714778	BOLD:AAD2483	Bryozoa	Bugula neritina	4734847	BOLD:AAD2484	Bryozoa	Bugula neritina	0.52	Intra-species
4711254	BOLD:AAD2483	Bryozoa	Bugula neritina	4734847	BOLD:AAD2484	Bryozoa	Bugula neritina	0.52	Intra-species
11762783	BOLD:AAD2483	Bryozoa	Bugula neritina	4734847	BOLD:AAD2484	Bryozoa	Bugula neritina	0.52	Intra-species
12989771	BOLD:AAD2483	Bryozoa	Bugula neritina	4734847	BOLD:AAD2484	Bryozoa	Bugula neritina	0.52	Intra-species
4711291	BOLD:AAD2483	Bryozoa	Bugula neritina	4734847	BOLD:AAD2484	Bryozoa	Bugula neritina	0.52	Intra-species
3143584	BOLD:AAD2483	Bryozoa	Bugula neritina	4734847	BOLD:AAD2484	Bryozoa	Bugula neritina	0.52	Intra-species
11762789	BOLD:AAD2483	Bryozoa	Bugula neritina	4734847	BOLD:AAD2484	Bryozoa	Bugula neritina	0.52	Intra-species
4714759	BOLD:AAD2483	Bryozoa	Bugula neritina	4734847	BOLD:AAD2484	Bryozoa	Bugula neritina	0.52	Intra-species
4714765	BOLD:AAD2483	Bryozoa	Bugula neritina	4734847	BOLD:AAD2484	Bryozoa	Bugula neritina	0.52	Intra-species
4711246	BOLD:AAD2483	Bryozoa	Bugula neritina	4734847	BOLD:AAD2484	Bryozoa	Bugula neritina	0.52	Intra-species
4714773	BOLD:AAD2483	Bryozoa	Bugula neritina	4734847	BOLD:AAD2484	Bryozoa	Bugula neritina	0.52	Intra-species
4714741	BOLD:AAD2483	Bryozoa	Bugula neritina	4734847	BOLD:AAD2484	Bryozoa	Bugula neritina	0.52	Intra-species
11762785	BOLD:AAD2483	Bryozoa	Bugula neritina	4734847	BOLD:AAD2484	Bryozoa	Bugula neritina	0.52	Intra-species
4711303	BOLD:AAD2483	Bryozoa	Bugula neritina	4734847	BOLD:AAD2484	Bryozoa	Bugula neritina	0.52	Intra-species
4714762	BOLD:AAD2483	Bryozoa	Bugula neritina	4734847	BOLD:AAD2484	Bryozoa	Bugula neritina	0.52	Intra-species
4714755	BOLD:AAD2483	Bryozoa	Bugula neritina	4734847	BOLD:AAD2484	Bryozoa	Bugula neritina	0.52	Intra-species
11762795	BOLD:AAW7349	Bryozoa	Bugula neritina	4734847	BOLD:AAD2484	Bryozoa	Bugula neritina	0.404	Intra-species
4711284	BOLD:AAD2483	Bryozoa	Bugula neritina	4734847	BOLD:AAD2484	Bryozoa	Bugula neritina	0.52	Intra-species
4711251	BOLD:AAD2483	Bryozoa	Bugula neritina	4734847	BOLD:AAD2484	Bryozoa	Bugula neritina	0.52	Intra-species
4711244	BOLD:AAD2483	Bryozoa	Bugula neritina	4734847	BOLD:AAD2484	Bryozoa	Bugula neritina	0.52	Intra-species
4711293	BOLD:AAD2483	Bryozoa	Bugula neritina	4734847	BOLD:AAD2484	Bryozoa	Bugula neritina	0.52	Intra-species
4714758	BOLD:AAD2483	Bryozoa	Bugula neritina	4734847	BOLD:AAD2484	Bryozoa	Bugula neritina	0.52	Intra-species
4711240	BOLD:AAD2483	Bryozoa	Bugula neritina	4734847	BOLD:AAD2484	Bryozoa	Bugula neritina	0.52	Intra-species
4714729	BOLD:AAD2482	Bryozoa	Bugula neritina	4734847	BOLD:AAD2484	Bryozoa	Bugula neritina	0.52	Intra-species
4711268	BOLD:AAD2483	Bryozoa	Bugula neritina	4734847	BOLD:AAD2484	Bryozoa	Bugula neritina	0.52	Intra-species
4711241	BOLD:AAD2483	Bryozoa	Bugula neritina	4734847	BOLD:AAD2484	Bryozoa	Bugula neritina	0.52	Intra-species
4711245	BOLD:AAD2483	Bryozoa	Bugula neritina	4734847	BOLD:AAD2484	Bryozoa	Bugula neritina	0.52	Intra-species
4714760	BOLD:AAD2483	Bryozoa	Bugula neritina	4734847	BOLD:AAD2484	Bryozoa	Bugula neritina	0.52	Intra-species
4711261	BOLD:AAD2483	Bryozoa	Bugula neritina	4734847	BOLD:AAD2484	Bryozoa	Bugula neritina	0.52	Intra-species
4711267	BOLD:AAD2483	Bryozoa	Bugula neritina	4734847	BOLD:AAD2484	Bryozoa	Bugula neritina	0.52	Intra-species
4714763	BOLD:AAD2483	Bryozoa	Bugula neritina	4734847	BOLD:AAD2484	Bryozoa	Bugula neritina	0.52	Intra-species
4711250	BOLD:AAD2483	Bryozoa	Bugula neritina	4734847	BOLD:AAD2484	Bryozoa	Bugula neritina	0.52	Intra-species
18430288	BOLD:AAD2483	Bryozoa	Bugula neritina	4734847	BOLD:AAD2484	Bryozoa	Bugula neritina	0.52	Intra-species
11762775	BOLD:AAD2483	Bryozoa	Bugula neritina	4734847	BOLD:AAD2484	Bryozoa	Bugula neritina	0.52	Intra-species
3143595	BOLD:AAD2484	Bryozoa	Bugula neritina	4734847	BOLD:AAD2484	Bryozoa	Bugula neritina	0.404	Intra-species
18430248	BOLD:AAD2483	Bryozoa	Bugula neritina	4734847	BOLD:AAD2484	Bryozoa	Bugula neritina	0.52	Intra-species
13766778	BOLD:AAD2484	Bryozoa	Bugula neritina	4734847	BOLD:AAD2484	Bryozoa	Bugula neritina	0.404	Intra-species
4711277	BOLD:AAD2483	Bryozoa	Bugula neritina	4734847	BOLD:AAD2484	Bryozoa	Bugula neritina	0.52	Intra-species
4714737	BOLD:AAD2483	Bryozoa	Bugula neritina	4734847	BOLD:AAD2484	Bryozoa	Bugula neritina	0.52	Intra-species
12419175	BOLD:AAD2483	Bryozoa	Bugula neritina	4734847	BOLD:AAD2484	Bryozoa	Bugula neritina	0.52	Intra-species
4714736	BOLD:AAD2484	Bryozoa	Bugula neritina	4734847	BOLD:AAD2484	Bryozoa	Bugula neritina	0.404	Intra-species
4714770	BOLD:AAD2483	Bryozoa	Bugula neritina	4734847	BOLD:AAD2484	Bryozoa	Bugula neritina	0.52	Intra-species
4714726	BOLD:AAD2482	Bryozoa	Bugula neritina	4734847	BOLD:AAD2484	Bryozoa	Bugula neritina	0.52	Intra-species
4714725	BOLD:AAD2482	Bryozoa	Bugula neritina	4734847	BOLD:AAD2484	Bryozoa	Bugula neritina	0.52	Intra-species
4711294	BOLD:AAD2483	Bryozoa	Bugula neritina	4734847	BOLD:AAD2484	Bryozoa	Bugula neritina	0.52	Intra-species
4711264	BOLD:AAD2483	Bryozoa	Bugula neritina	4734847	BOLD:AAD2484	Bryozoa	Bugula neritina	0.52	Intra-species
3143592	BOLD:AAD2483	Bryozoa	Bugula neritina	4734847	BOLD:AAD2484	Bryozoa	Bugula neritina	0.52	Intra-species
4711282	BOLD:AAD2483	Bryozoa	Bugula neritina	4734847	BOLD:AAD2484	Bryozoa	Bugula neritina	0.52	Intra-species
4714735	BOLD:AAD2482	Bryozoa	Bugula neritina	4734847	BOLD:AAD2484	Bryozoa	Bugula neritina	0.52	Intra-species
4714732	BOLD:AAD2482	Bryozoa	Bugula neritina	4734847	BOLD:AAD2484	Bryozoa	Bugula neritina	0.52	Intra-species
4711274	BOLD:AAD2483	Bryozoa	Bugula neritina	4734847	BOLD:AAD2484	Bryozoa	Bugula neritina	0.52	Intra-species
4714719	BOLD:AAD2483	Bryozoa	Bugula neritina	4734847	BOLD:AAD2484	Bryozoa	Bugula neritina	0.52	Intra-species
4711248	BOLD:AAD2483	Bryozoa	Bugula neritina	4734847	BOLD:AAD2484	Bryozoa	Bugula neritina	0.52	Intra-species
4714746	BOLD:AAD2484	Bryozoa	Bugula neritina	4734847	BOLD:AAD2484	Bryozoa	Bugula neritina	0.404	Intra-species
3143590	BOLD:AAD2483	Bryozoa	Bugula neritina	4734847	BOLD:AAD2484	Bryozoa	Bugula neritina	0.52	Intra-species
4711281	BOLD:AAD2483	Bryozoa	Bugula neritina	4734847	BOLD:AAD2484	Bryozoa	Bugula neritina	0.52	Intra-species
3143586	BOLD:AAD2483	Bryozoa	Bugula neritina	4734847	BOLD:AAD2484	Bryozoa	Bugula neritina	0.52	Intra-species
4714734	BOLD:AAD2482	Bryozoa	Bugula neritina	4734847	BOLD:AAD2484	Bryozoa	Bugula neritina	0.52	Intra-species
4711247	BOLD:AAD2483	Bryozoa	Bugula neritina	4734847	BOLD:AAD2484	Bryozoa	Bugula neritina	0.52	Intra-species
11762784	BOLD:AAD2483	Bryozoa	Bugula neritina	4734847	BOLD:AAD2484	Bryozoa	Bugula neritina	0.52	Intra-species
12419176	BOLD:AAD2483	Bryozoa	Bugula neritina	4734847	BOLD:AAD2484	Bryozoa	Bugula neritina	0.52	Intra-species
4714740	BOLD:AAD2483	Bryozoa	Bugula neritina	4734847	BOLD:AAD2484	Bryozoa	Bugula neritina	0.52	Intra-species
11762779	BOLD:AAD2483	Bryozoa	Bugula neritina	4734847	BOLD:AAD2484	Bryozoa	Bugula neritina	0.52	Intra-species
11762773	BOLD:AAD2483	Bryozoa	Bugula neritina	4734847	BOLD:AAD2484	Bryozoa	Bugula neritina	0.52	Intra-species
11762778	BOLD:AAD2483	Bryozoa	Bugula neritina	4734847	BOLD:AAD2484	Bryozoa	Bugula neritina	0.52	Intra-species
4711301	BOLD:AAD2483	Bryozoa	Bugula neritina	4734847	BOLD:AAD2484	Bryozoa	Bugula neritina	0.52	Intra-species
4711260	BOLD:AAD2483	Bryozoa	Bugula neritina	4734847	BOLD:AAD2484	Bryozoa	Bugula neritina	0.52	Intra-species
4711285	BOLD:AAD2483	Bryozoa	Bugula neritina	4734847	BOLD:AAD2484	Bryozoa	Bugula neritina	0.52	Intra-species
4714753	BOLD:AAD2483	Bryozoa	Bugula neritina	4734847	BOLD:AAD2484	Bryozoa	Bugula neritina	0.52	Intra-species
4714754	BOLD:AAD2483	Bryozoa	Bugula neritina	4734847	BOLD:AAD2484	Bryozoa	Bugula neritina	0.52	Intra-species
3143589	BOLD:AAD2482	Bryozoa	Bugula neritina	4734847	BOLD:AAD2484	Bryozoa	Bugula neritina	0.52	Intra-species
4714733	BOLD:AAD2482	Bryozoa	Bugula neritina	4734847	BOLD:AAD2484	Bryozoa	Bugula neritina	0.52	Intra-species
4714724	BOLD:AAD2482	Bryozoa	Bugula neritina	4734847	BOLD:AAD2484	Bryozoa	Bugula neritina	0.52	Intra-species
3143588	BOLD:AAD2483	Bryozoa	Bugula neritina	4734847	BOLD:AAD2484	Bryozoa	Bugula neritina	0.52	Intra-species
11762790	BOLD:AAD2483	Bryozoa	Bugula neritina	4734847	BOLD:AAD2484	Bryozoa	Bugula neritina	0.52	Intra-species
4711278	BOLD:AAD2483	Bryozoa	Bugula neritina	4734847	BOLD:AAD2484	Bryozoa	Bugula neritina	0.52	Intra-species
4714723	BOLD:AAD2482	Bryozoa	Bugula neritina	4734847	BOLD:AAD2484	Bryozoa	Bugula neritina	0.52	Intra-species
4711276	BOLD:AAD2483	Bryozoa	Bugula neritina	4734847	BOLD:AAD2484	Bryozoa	Bugula neritina	0.52	Intra-species
4714721	BOLD:AAD2483	Bryozoa	Bugula neritina	4734847	BOLD:AAD2484	Bryozoa	Bugula neritina	0.52	Intra-species
4711298	BOLD:AAD2483	Bryozoa	Bugula neritina	4734847	BOLD:AAD2484	Bryozoa	Bugula neritina	0.52	Intra-species
4714748	BOLD:AAD2483	Bryozoa	Bugula neritina	4734847	BOLD:AAD2484	Bryozoa	Bugula neritina	0.52	Intra-species
4711255	BOLD:AAD2483	Bryozoa	Bugula neritina	4734847	BOLD:AAD2484	Bryozoa	Bugula neritina	0.52	Intra-species
4714761	BOLD:AAD2483	Bryozoa	Bugula neritina	4734847	BOLD:AAD2484	Bryozoa	Bugula neritina	0.52	Intra-species
4714768	BOLD:AAD2483	Bryozoa	Bugula neritina	4734847	BOLD:AAD2484	Bryozoa	Bugula neritina	0.52	Intra-species
4711243	BOLD:AAD2484	Bryozoa	Bugula neritina	4734847	BOLD:AAD2484	Bryozoa	Bugula neritina	0.404	Intra-species
4714747	BOLD:AAD2483	Bryozoa	Bugula neritina	4734847	BOLD:AAD2484	Bryozoa	Bugula neritina	0.52	Intra-species
4714756	BOLD:AAD2483	Bryozoa	Bugula neritina	4734847	BOLD:AAD2484	Bryozoa	Bugula neritina	0.52	Intra-species
11762781	BOLD:AAD2483	Bryozoa	Bugula neritina	4734847	BOLD:AAD2484	Bryozoa	Bugula neritina	0.52	Intra-species
4714776	BOLD:AAD2483	Bryozoa	Bugula neritina	4734847	BOLD:AAD2484	Bryozoa	Bugula neritina	0.52	Intra-species
4714718	BOLD:AAD2484	Bryozoa	Bugula neritina	4734847	BOLD:AAD2484	Bryozoa	Bugula neritina	0.404	Intra-species
4714743	BOLD:AAD2483	Bryozoa	Bugula neritina	4734847	BOLD:AAD2484	Bryozoa	Bugula neritina	0.52	Intra-species
11762791	BOLD:AAD2483	Bryozoa	Bugula neritina	4734847	BOLD:AAD2484	Bryozoa	Bugula neritina	0.52	Intra-species
10379946	BOLD:AAD2483	Bryozoa	Bugula neritina	4734847	BOLD:AAD2484	Bryozoa	Bugula neritina	0.52	Intra-species
4711279	BOLD:AAD2483	Bryozoa	Bugula neritina	4734847	BOLD:AAD2484	Bryozoa	Bugula neritina	0.52	Intra-species
4714757	BOLD:AAD2483	Bryozoa	Bugula neritina	4734847	BOLD:AAD2484	Bryozoa	Bugula neritina	0.52	Intra-species
3143585	BOLD:AAD2483	Bryozoa	Bugula neritina	4734847	BOLD:AAD2484	Bryozoa	Bugula neritina	0.52	Intra-species
4714730	BOLD:AAD2482	Bryozoa	Bugula neritina	4734847	BOLD:AAD2484	Bryozoa	Bugula neritina	0.52	Intra-species
4714766	BOLD:AAD2483	Bryozoa	Bugula neritina	4734847	BOLD:AAD2484	Bryozoa	Bugula neritina	0.52	Intra-species
4711300	BOLD:AAD2483	Bryozoa	Bugula neritina	4734847	BOLD:AAD2484	Bryozoa	Bugula neritina	0.52	Intra-species
4711299	BOLD:AAD2483	Bryozoa	Bugula neritina	4734847	BOLD:AAD2484	Bryozoa	Bugula neritina	0.52	Intra-species
11762776	BOLD:AAD2484	Bryozoa	Bugula neritina	4734847	BOLD:AAD2484	Bryozoa	Bugula neritina	0.404	Intra-species
4714779	BOLD:AAD2483	Bryozoa	Bugula neritina	4734847	BOLD:AAD2484	Bryozoa	Bugula neritina	0.52	Intra-species
4711256	BOLD:AAD2483	Bryozoa	Bugula neritina	4734847	BOLD:AAD2484	Bryozoa	Bugula neritina	0.52	Intra-species
18430289	BOLD:AAD2483	Bryozoa	Bugula neritina	4734847	BOLD:AAD2484	Bryozoa	Bugula neritina	0.52	Intra-species
4714777	BOLD:AAD2483	Bryozoa	Bugula neritina	4734847	BOLD:AAD2484	Bryozoa	Bugula neritina	0.52	Intra-species
4714767	BOLD:AAD2483	Bryozoa	Bugula neritina	4734847	BOLD:AAD2484	Bryozoa	Bugula neritina	0.52	Intra-species
14759143	BOLD:AAD2483	Bryozoa	Bugula neritina	4734847	BOLD:AAD2484	Bryozoa	Bugula neritina	0.52	Intra-species
4714739	BOLD:AAD2483	Bryozoa	Bugula neritina	4734847	BOLD:AAD2484	Bryozoa	Bugula neritina	0.52	Intra-species
4711253	BOLD:AAD2483	Bryozoa	Bugula neritina	4734847	BOLD:AAD2484	Bryozoa	Bugula neritina	0.52	Intra-species
4711273	BOLD:AAD2483	Bryozoa	Bugula neritina	4734847	BOLD:AAD2484	Bryozoa	Bugula neritina	0.52	Intra-species
4711265	BOLD:AAD2483	Bryozoa	Bugula neritina	4734847	BOLD:AAD2484	Bryozoa	Bugula neritina	0.52	Intra-species
11762774	BOLD:AAD2483	Bryozoa	Bugula neritina	4734847	BOLD:AAD2484	Bryozoa	Bugula neritina	0.52	Intra-species
11762786	BOLD:AAD2483	Bryozoa	Bugula neritina	4734847	BOLD:AAD2484	Bryozoa	Bugula neritina	0.52	Intra-species
4714752	BOLD:AAD2483	Bryozoa	Bugula neritina	4734847	BOLD:AAD2484	Bryozoa	Bugula neritina	0.52	Intra-species
4714749	BOLD:AAD2483	Bryozoa	Bugula neritina	4734847	BOLD:AAD2484	Bryozoa	Bugula neritina	0.52	Intra-species
11762777	BOLD:AAD2483	Bryozoa	Bugula neritina	4734847	BOLD:AAD2484	Bryozoa	Bugula neritina	0.52	Intra-species
4711280	BOLD:AAD2483	Bryozoa	Bugula neritina	4734847	BOLD:AAD2484	Bryozoa	Bugula neritina	0.52	Intra-species
11762782	BOLD:AAD2483	Bryozoa	Bugula neritina	4734847	BOLD:AAD2484	Bryozoa	Bugula neritina	0.52	Intra-species
4714771	BOLD:AAD2483	Bryozoa	Bugula neritina	4734847	BOLD:AAD2484	Bryozoa	Bugula neritina	0.52	Intra-species
4711304	BOLD:AAD2483	Bryozoa	Bugula neritina	4734847	BOLD:AAD2484	Bryozoa	Bugula neritina	0.52	Intra-species
3143580	BOLD:AAD2482	Bryozoa	Bugula neritina	4734847	BOLD:AAD2484	Bryozoa	Bugula neritina	0.52	Intra-species
4711258	BOLD:AAD2483	Bryozoa	Bugula neritina	4734847	BOLD:AAD2484	Bryozoa	Bugula neritina	0.52	Intra-species
4714744	BOLD:AAD2484	Bryozoa	Bugula neritina	4734847	BOLD:AAD2484	Bryozoa	Bugula neritina	0.404	Intra-species
4711302	BOLD:AAD2483	Bryozoa	Bugula neritina	4734847	BOLD:AAD2484	Bryozoa	Bugula neritina	0.52	Intra-species
4711270	BOLD:AAD2483	Bryozoa	Bugula neritina	4734847	BOLD:AAD2484	Bryozoa	Bugula neritina	0.52	Intra-species
4711242	BOLD:AAD2483	Bryozoa	Bugula neritina	4734847	BOLD:AAD2484	Bryozoa	Bugula neritina	0.52	Intra-species
11762798	BOLD:AAD2483	Bryozoa	Bugula neritina	4734847	BOLD:AAD2484	Bryozoa	Bugula neritina	0.52	Intra-species
4711252	BOLD:AAD2483	Bryozoa	Bugula neritina	4734847	BOLD:AAD2484	Bryozoa	Bugula neritina	0.52	Intra-species
4711296	BOLD:AAD2483	Bryozoa	Bugula neritina	4734847	BOLD:AAD2484	Bryozoa	Bugula neritina	0.52	Intra-species
11762796	BOLD:AAD2483	Bryozoa	Bugula neritina	4734847	BOLD:AAD2484	Bryozoa	Bugula neritina	0.52	Intra-species
4711283	BOLD:AAD2483	Bryozoa	Bugula neritina	4734847	BOLD:AAD2484	Bryozoa	Bugula neritina	0.52	Intra-species
4711263	BOLD:AAD2483	Bryozoa	Bugula neritina	4734847	BOLD:AAD2484	Bryozoa	Bugula neritina	0.52	Intra-species
4711290	BOLD:AAD2483	Bryozoa	Bugula neritina	4734847	BOLD:AAD2484	Bryozoa	Bugula neritina	0.52	Intra-species
4714742	BOLD:AAD2483	Bryozoa	Bugula neritina	4734847	BOLD:AAD2484	Bryozoa	Bugula neritina	0.52	Intra-species
4711269	BOLD:AAD2483	Bryozoa	Bugula neritina	4734847	BOLD:AAD2484	Bryozoa	Bugula neritina	0.52	Intra-species
11762555	BOLD:AAD2484	Bryozoa	Bugula neritina	4734847	BOLD:AAD2484	Bryozoa	Bugula neritina	0.404	Intra-species
18430290	BOLD:AAD2483	Bryozoa	Bugula neritina	4734847	BOLD:AAD2484	Bryozoa	Bugula neritina	0.52	Intra-species
3143591	BOLD:AAD2483	Bryozoa	Bugula neritina	4734847	BOLD:AAD2484	Bryozoa	Bugula neritina	0.52	Intra-species
4714769	BOLD:AAD2483	Bryozoa	Bugula neritina	4734847	BOLD:AAD2484	Bryozoa	Bugula neritina	0.52	Intra-species
3143594	BOLD:AAD2482	Bryozoa	Bugula neritina	4734847	BOLD:AAD2484	Bryozoa	Bugula neritina	0.52	Intra-species
4711295	BOLD:AAD2483	Bryozoa	Bugula neritina	4734847	BOLD:AAD2484	Bryozoa	Bugula neritina	0.52	Intra-species
4711286	BOLD:AAD2484	Bryozoa	Bugula neritina	4734847	BOLD:AAD2484	Bryozoa	Bugula neritina	0.404	Intra-species
4711297	BOLD:AAD2483	Bryozoa	Bugula neritina	4734847	BOLD:AAD2484	Bryozoa	Bugula neritina	0.52	Intra-species
4714774	BOLD:AAD2483	Bryozoa	Bugula neritina	4734847	BOLD:AAD2484	Bryozoa	Bugula neritina	0.52	Intra-species
4714764	BOLD:AAD2483	Bryozoa	Bugula neritina	4734847	BOLD:AAD2484	Bryozoa	Bugula neritina	0.52	Intra-species
4711266	BOLD:AAD2483	Bryozoa	Bugula neritina	4734847	BOLD:AAD2484	Bryozoa	Bugula neritina	0.52	Intra-species
4711262	BOLD:AAD2483	Bryozoa	Bugula neritina	4734847	BOLD:AAD2484	Bryozoa	Bugula neritina	0.52	Intra-species
4714722	BOLD:AAD2483	Bryozoa	Bugula neritina	4734847	BOLD:AAD2484	Bryozoa	Bugula neritina	0.52	Intra-species
3143579	BOLD:AAD2483	Bryozoa	Bugula neritina	4734847	BOLD:AAD2484	Bryozoa	Bugula neritina	0.52	Intra-species
4714751	BOLD:AAD2483	Bryozoa	Bugula neritina	4734847	BOLD:AAD2484	Bryozoa	Bugula neritina	0.52	Intra-species
4711289	BOLD:AAD2483	Bryozoa	Bugula neritina	4734847	BOLD:AAD2484	Bryozoa	Bugula neritina	0.52	Intra-species
4711292	BOLD:AAD2483	Bryozoa	Bugula neritina	4734847	BOLD:AAD2484	Bryozoa	Bugula neritina	0.52	Intra-species
14128463	BOLD:AAD2483	Bryozoa	Bugula neritina	4734847	BOLD:AAD2484	Bryozoa	Bugula neritina	0.52	Intra-species
4711287	BOLD:AAD2483	Bryozoa	Bugula neritina	4734847	BOLD:AAD2484	Bryozoa	Bugula neritina	0.52	Intra-species
4714720	BOLD:AAD2483	Bryozoa	Bugula neritina	4734847	BOLD:AAD2484	Bryozoa	Bugula neritina	0.52	Intra-species
11762800	BOLD:AAD2483	Bryozoa	Bugula neritina	4734847	BOLD:AAD2484	Bryozoa	Bugula neritina	0.52	Intra-species
3143583	BOLD:AAD2482	Bryozoa	Bugula neritina	4734847	BOLD:AAD2484	Bryozoa	Bugula neritina	0.52	Intra-species
3143582	BOLD:AAD2483	Bryozoa	Bugula neritina	4734847	BOLD:AAD2484	Bryozoa	Bugula neritina	0.52	Intra-species
4714727	BOLD:AAD2482	Bryozoa	Bugula neritina	4734847	BOLD:AAD2484	Bryozoa	Bugula neritina	0.52	Intra-species
11762788	BOLD:AAD2483	Bryozoa	Bugula neritina	4734847	BOLD:AAD2484	Bryozoa	Bugula neritina	0.52	Intra-species
4711272	BOLD:AAD2483	Bryozoa	Bugula neritina	4734847	BOLD:AAD2484	Bryozoa	Bugula neritina	0.52	Intra-species
4714775	BOLD:AAD2484	Bryozoa	Bugula neritina	4734847	BOLD:AAD2484	Bryozoa	Bugula neritina	0.404	Intra-species
11762793	BOLD:AAD2483	Bryozoa	Bugula neritina	4734847	BOLD:AAD2484	Bryozoa	Bugula neritina	0.52	Intra-species
14759144	BOLD:AAD2484	Bryozoa	Bugula neritina	4734847	BOLD:AAD2484	Bryozoa	Bugula neritina	0.404	Intra-species
4734847	BOLD:AAD2484	Bryozoa	Bugula neritina	5426763	BOLD:AAD2483	Bryozoa	Bugula neritina	0.52	Intra-species
4734847	BOLD:AAD2484	Bryozoa	Bugula neritina	5426764	BOLD:AAD2483	Bryozoa	Bugula neritina	0.52	Intra-species
4734847	BOLD:AAD2484	Bryozoa	Bugula neritina	8189745	BOLD:AAD2483	Bryozoa	Bugula neritina	0.52	Intra-species
